# Supplementary material for: An efficient palladium–benzimidazolyl phosphine complex for the Suzuki–Miyaura coupling of aryl mesylates: facile ligand synthesis and metal complex characterization
Source: Royal Society of Chemistry journal article supplement (doi:10.1039/c2cc15972d), 2012-01-01
Supplement: c2cc15972d.pdf [file c2cc15972d.pdf]

## Supporting Information

### An efficient palladium-benzimidazolyl phosphine complex for the Suzuki-Miyaura coupling of aryl mesylates: facile ligand synthesis and metal complex characterization

Kin Ho Chung, Chau Ming So\*, Shun Man Wong, Chi Him Luk, Chak Po Lau and Fuk Yee Kwong\*

*State Key Laboratory of Chirosciences and Department of Applied Biology and Chemical Technology,  
The Hong Kong Polytechnic University, Hung Hom, Hong Kong.  
E-mail: [bccmso@inet.polyu.edu.hk](mailto:bccmso@inet.polyu.edu.hk), [bcfyk@inet.polyu.edu.hk](mailto:bcfyk@inet.polyu.edu.hk)*

#### Table of Contents

---

|                                                                                       |      |
|---------------------------------------------------------------------------------------|------|
| 1. General considerations.....                                                        | S2   |
| 2. Preparation of benzimidazolyl phosphine ligands.....                               | S3   |
| 3. General procedures/data for initial ligand and reaction condition screenings.....  | S8   |
| 4. General procedures for palladium-catalyzed Suzuki coupling of aryl mesylates.....  | S10  |
| 5. Characterization data for coupling products.....                                   | S11  |
| 6. X-ray crystal data of complex <b>Pd-L2</b> .....                                   | S19  |
| 7. <sup>1</sup> H, <sup>13</sup> C, <sup>31</sup> P NMR, MS, HRMS and IR spectra..... | S38  |
| 8. References.....                                                                    | S125 |

---

## 1. General considerations.

Unless otherwise noted, all reagents were purchased from commercial suppliers and used without purification. All Suzuki-Miyaura reactions were performed in Rotaflor® (England) resealable screw cap Schlenk flask (approx. 20 mL volume) in the presence of Teflon coated magnetic stirrer bar (4 mm × 10 mm). Toluene and tetrahydrofuran (THF) were distilled from sodium and sodium benzophenone ketyl under nitrogen, respectively.<sup>1</sup> *N,N*-Dimethylformamide (DMF) was distilled under calcium hydride under reduced pressure. Toluene and dioxane were distilled from sodium under nitrogen. *t*-Butanol was refluxing with sodium and distilled from Calcium hydrides under nitrogen. Chlorodiphenylphosphine was distilled under vacuum prior to use. New bottle of *n*-butyllithium was used (*Note*: since the concentration of *n*-BuLi from old bottle may vary, we performed titration prior to use). K<sub>2</sub>CO<sub>3</sub> and K<sub>3</sub>PO<sub>4</sub> and K<sub>3</sub>PO<sub>4</sub> · H<sub>2</sub>O were purchased from Fluka. Thin layer chromatography was performed on Merck precoated silica gel 60 F<sub>254</sub> plates. Silica gel (Merck, 70-230 and 230-400 mesh) was used for column chromatography. Melting points were recorded on an uncorrected Büchi Melting Point B-545 instrument. <sup>1</sup>H NMR spectra were recorded on a Bruker (400 MHz) spectrometer. Spectra were referenced internally to the residual proton resonance in CDCl<sub>3</sub> (δ 7.26 ppm), or with tetramethylsilane (TMS, δ 0.00 ppm) as the internal standard. Chemical shifts (δ) were reported as part per million (ppm) in δ scale downfield from TMS. <sup>13</sup>C NMR spectra were referenced to CDCl<sub>3</sub> (δ 77.0 ppm, the middle peak). <sup>31</sup>P NMR spectra were referenced to 85% H<sub>3</sub>PO<sub>4</sub> externally. Coupling constants (*J*) were reported in Hertz (Hz). Mass spectra (EI-MS and ES-MS) were recorded on a HP 5989B Mass Spectrometer. High-resolution mass spectra (HRMS) were obtained on a Bruker APEX 47e FT-ICR mass spectrometer (ESIMS). GC-MS analysis was conducted on a HP 5973 GCD system using a HP5MS column (30 m × 0.25 mm). The

products described in GC yield were accorded to the authentic samples/dodecane calibration standard from HP 6890 GC-FID system. Compounds described in the literature were characterized by comparison of their  $^1\text{H}$ , and/or  $^{13}\text{C}$  NMR spectra to the previously reported data. The procedures in this section are representative, and thus the yields may differ from those reported in tables.

## 2. Preparation of benzimidazolyl phosphine ligands L1-L3

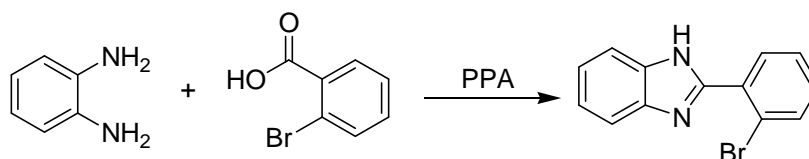

2-(2-bromophenyl)-1H-benzimidazole was synthesized according to the literature method.<sup>2</sup> 2-bromobenzoic acid (100 mmol) and 1,2-phenylenediamine (100 mmol) were taken in polyphosphoric acid (~120 g) and heated to 150 °C for 6 h. The reaction mixture was poured over crushed ice and kept in a refrigerator overnight. The resulting violet solid precipitate was filtered and added to 0.5 M  $\text{Na}_2\text{CO}_3$  solution (500 mL), stirred for 30 min and filtered. The precipitate was dissolved in methanol (300 mL), and filtered through celite. The solution was evaporated to yield a white solid. Hexane was used to further wash the product. The product was then dried under vacuum to afford 2-(2-bromophenyl)-1H-benzimidazole (20 g, 70%) as a white solid.  $^1\text{H}$  NMR (400 MHz,  $\text{CDCl}_3$ )  $\delta$  7.28-7.35 (m, 3H), 7.43-7.47 (m, 1H), 7.53-7.56 (m, 1H), 7.70 (d,  $J=8.0\text{Hz}$ , 1H), 7.85-7.87 (m, 1H), 8.25 (d,  $J=7.6\text{Hz}$ , 1H), 10.52 (s, 1H);  $^{13}\text{C}$  NMR (100 MHz, MeOD)  $\delta$  114.6, 121.7, 122.5, 127.2, 131.1, 131.7, 131.8, 133.1, 138.0, 150.7; MS (EI):  $m/z$  (relative intensity) 272.0 ( $\text{M}^+$ , 100), 193.0 (53), 90.0 (28).

### 2-(2-bromophenyl)-1-methyl-1H-benzimidazole

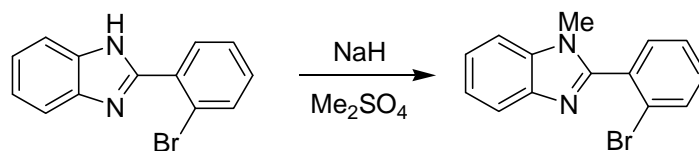

General procedure for methylation of 2-(2-bromophenyl)-1H-benzimidazole: 2-(2-bromophenyl)-1H-benzimidazole (10.9 g, 40 mmol) was dissolved in 500 ml THF in dropping funnel and added dropwisely to the 1 L THF solution contained 1.2 equiv NaH (60% in mineral oil, 1.92 g, 48 mmol) at room temperature. NaH was washed with hexane (10 ml × 3) under N<sub>2</sub>. The mixture stirred for 1 h at room temperature. Dimethylsulfate (4.16ml, 44 mmol) was then added to the mixture dropwisely. The mixture was refluxed for 30 min and stirred at room temperature for 3 h. Solvent was removed by vacuum. EA and water was added to the mixture and the organic phase was separated. The combined organic phase was washed with brine several times and concentrated. The concentrated mixture was applied to 3 × 3cm silica pad and eluted with EA. The organic solvent was dried over Na<sub>2</sub>SO<sub>4</sub> and evaporated in vacuum. The white solid of 2-(2-bromophenyl)-1-methyl-1H-benzimidazole<sup>3</sup> (8.6 g, 75%) was obtained. <sup>1</sup>HNMR (400 MHz, CDCl<sub>3</sub>) δ 3.66 (s, 3H), 7.34-7.49 (m, 5H), 7.55 (dd, *J*=7.4Hz, 1.6Hz, 1H), 7.72 (dd, *J*=8.0 Hz, 1.2Hz, 1H), 7.85-7.89 (m, 1H); <sup>13</sup>C NMR (100 MHz, CDCl<sub>3</sub>) δ 30.7, 109.6, 120.0, 122.3, 122.8, 123.7, 127.4, 131.3, 132.0, 132.3, 132.7, 135.4, 142.7, 152.4; MS (EI): *m/z* (relative intensity) 286.0 (M<sup>+</sup>, 100), 207.1 (93), 103.1 (22), 77.0 (43).

### 1-methyl-2-(2-(diphenylphosphino)phenyl)-1H-benzimidazole (**L1**)

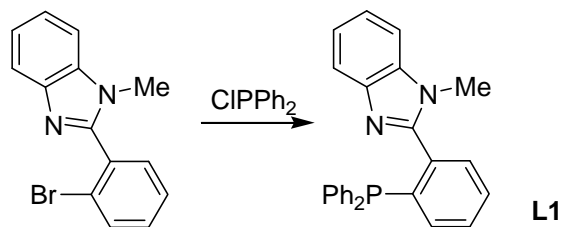

*General procedure for ligand synthesis:* 2-(2-bromophenyl)-1-methyl-benzimidazole (0.86 g, 3.0 mmol) was dissolved in freshly distilled THF (20 mL) at room temperature under a nitrogen atmosphere. The solution was cooled to -78 °C in dry ice/acetone bath. Titrated *n*-BuLi (3.0 mmol) was added dropwisely by syringe. After the reaction mixture was stirred for 30 min at -78 °C, chlorodiphenylphosphine (0.55 mL, 3.0 mmol) was added. The reaction was allowed to warm to room temperature and stirred for 5 h. Solvent was removed under reduced pressure. DCM and water was added to the mixture and the organic phase was separated. The combined organic phase was washed with brine several times and concentrated. The concentrated mixture was applied to 2 × 10 cm silica pad and eluted with 200ml EA:Hexane (1:9). This fraction was discarded and further eluted with EA: Hexane (4:6). The collected solvent was removed under vacuum and the solid product was further purified by washing with small amount of cold diethyl ether. The product was then dried under vacuum. White solid of 2-(2-(dicyclohexylphosphino)phenyl)-1-methyl-benzimidazole (**L1**) (0.95g, 80%) were obtained. Melting point. 174.2-176.2°C; <sup>31</sup>P NMR (161MHz, CD<sub>2</sub>Cl<sub>2</sub>) δ -11.7; <sup>1</sup>H NMR (400 MHz, CD<sub>2</sub>Cl<sub>2</sub>) δ 3.46 (s, 3H), 7.25-7.38 (m, 14H), 7.49-7.55 (m, 3H), 7.72-7.74 (m, 1H); <sup>13</sup>C NMR (100 MHz, CD<sub>2</sub>Cl<sub>2</sub>) δ 30.5, 109.3, 119.5, 121.7, 122.2, 128.1, 128.2, 128.5, 129.5, 130.4, 130.5, 133.5, 133.7, 133.8, 135.4, 136.0, 136.3, 136.6, 136.7, 139.5, 139.7, 142.7, 153.1 (unresolved complex C-P splittings were observed); IR (cm<sup>-1</sup>): 3051.12, 1613.13, 1478.90, 1462.03, 1424.04,

1377.53, 1327.71, 1282.58, 1244.50, 1148.55, 1125.98, 1093.06, 1027.09, 1005.94, 773.97, 745.88, 695.76, 521.56, 493.47, 469.17; MS (EI):  $m/z$  (relative intensity) 392.1 ( $M^+$ , 2), 315.1 (100), 223.0 (22), 207.0 (26); HRMS: calcd. for  $C_{26}H_{21}N_2PH^+$ : 393.1521, found 393.1524.

### 1-methyl-2-(2-(dicyclohexylphosphino)phenyl)-1H-benzoimidazole (**L2**)

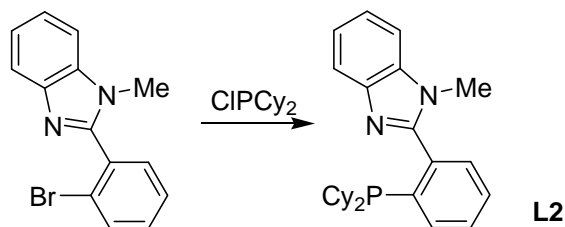

General procedures for the synthesis of ligand **L1** were followed. 2-(2-bromophenyl)-1-methylbenzimidazole (2.86 g, 10.0 mmol), *n*-BuLi (10.0 mmol), chlorodicyclohexylphosphine (2.20 mL, 10.0 mmol), and 40 mL THF were used to afford 1-methyl-2-(2-(dicyclohexylphosphino)phenyl)-1H-benzimidazole (**L2**) (2.85 g, 70%) as a white solid. Small amount of cool hexane instead of diethyl ether was used for washing the products. Melting point. 155.7-158.1 °C; <sup>31</sup>P NMR (161MHz, CD<sub>2</sub>Cl<sub>2</sub>) δ -8.07; <sup>1</sup>H NMR (400 MHz, CD<sub>2</sub>Cl<sub>2</sub>) δ 1.10-1.31(m, 10H), 1.67-1.78 (m, 10H), 1.91-1.94 (m, 2H), 3.56 (s, 3H), 7.30-7.37 (m, 2H), 7.43-7.61 (m, 4H), 7.71-7.79 (m, 2H); <sup>13</sup>C NMR (100 MHz, CD<sub>2</sub>Cl<sub>2</sub>) δ 26.3, 27.1, 27.1, 27.2, 29.2, 29.3, 30.0, 30.2, 30.6, 30.7, 33.6, 33.7, 109.4, 119.3, 121.5, 122.0, 128.5, 128.8, 130.5, 1306, 132.6, 132.7, 135.3, 137.0, 137.2, 138.8, 139.1, 142.9, 154.6, 154.6(unresolved complex C-P splittings were observed); IR (cm<sup>-1</sup>): 3049.23, 2922.74, 2846.49, 1444.05, 1420.25, 1380.93, 1323.98, 1279.02, 1236.37, 1179.81, 1150.92, 1121.29, 1041.62, 1001.29, 885.48, 849.19, 773.73, 746.94, 526.06, 457.22; MS (EI):  $m/z$  (relative intensity) 404.2 ( $M^+$ , 0), 321.1

(100), 238.0 (39), 223.0 (28), 55.1 (7); HRMS: calcd. for  $C_{26}H_{33}N_2PH^+$  : 405.2460, found 405.2445.

### 1-methyl-2-(2-(diisopropylhexylphosphino)phenyl)-1H-benzoimidazole (**L3**)

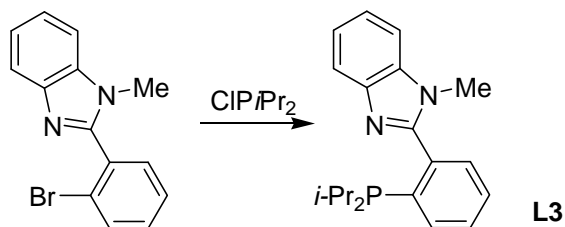

General procedures for the synthesis of ligand **L1** were followed. 2-(2-bromophenyl)-1-methylbenzoimidazole (0.86 g, 3.0 mmol), *n*-BuLi (3.0 mmol), chlorodiisopropylphosphine (0.47 mL, 3.0 mmol) were used to afford 1-methyl-2-(2-(diisopropylphosphino)phenyl)-1H-benzoimidazole (**L2**) (0.802 g, 83%) as a white solid. Small amount of cool hexane instead of diethyl ether was used for washing the products. Melting point. 147.7-149.7 °C;  $^{31}P$  NMR (161MHz,  $CD_2Cl_2$ )  $\delta$  0.45;  $^1H$  NMR (400 MHz,  $CD_2Cl_2$ )  $\delta$  1.02-1.09 (m, 12H), 2.14-2.18 (m, 2H), 3.59 (s, 3H), 7.31-7.38 (m, 2H), 7.44- 7.46 (m, 1H), 7.50-7.63 (m, 3H), 7.71-7.73 (m, 1H), 7.78-7.80 (m, 1H);  $^{13}C$  NMR (100 MHz,  $CD_2Cl_2$ )  $\delta$  19.1, 19.2, 19.5, 19.6, 23.6, 23.8, 30.5, 30.6, 109.3, 119.3, 121.5, 122.1, 128.6, 128.9, 130.5, 130.6, 132.2, 132.3, 135.2, 137.4, 137.6, 138.5, 138.8, 142.9, 154.4, 154.5 (unresolved complex C-P splittings were observed); IR ( $cm^{-1}$ ): 2959.77, 2941.70, 2859.58, 1441.13, 1421.73, 1382.81, 1325.73, 1279.50, 1239.22, 1150.84, 1119.29, 1032.32, 1002.00, 881.61, 775.91, 749.74, 653.87, 609.59, 596.19, 515.71; MS (EI):  $m/z$  (relative intensity) 324.2 ( $M^+$ , 0), 281.1 (100), 238.0 (56), 223.0 (38), 207.0 (48); HRMS: calcd. for  $C_{20}H_{25}N_2PH^+$  : 325.1834, found 325.1822.





### 3. General procedures/data for initial ligand and reaction conditions screening

*General procedure for screening:* Pd(OAc)<sub>2</sub> (1.15 mg, 0.05 mmol), Ligand **L**, 4-*tert*-butylphenyl mesylate (1.0 mmol), *p*-tolylboronic acid (2 mmol) and base (3 mmol) were loaded into a Schlenk tube equipped with a Teflon-coated magnetic stir bar. The tube was evacuated and flushed with nitrogen (3 cycles). Solvent (3.0 mL) was added with continuous stirring at room temperature for 5 minutes. The tube was then placed into a preheated oil bath (120 °C) and stirred for 24 h. After completion of reaction, the reaction tube was allowed to cool to room temperature. Ethyl acetate (~10 mL), dodecane (227 μL, internal standard) and water were added. The organic layer was subjected to GC analysis. The GC yield obtained was previously calibrated by authentic sample/dodecane calibration curve.

**S. Table 1** Optimization of reaction conditions

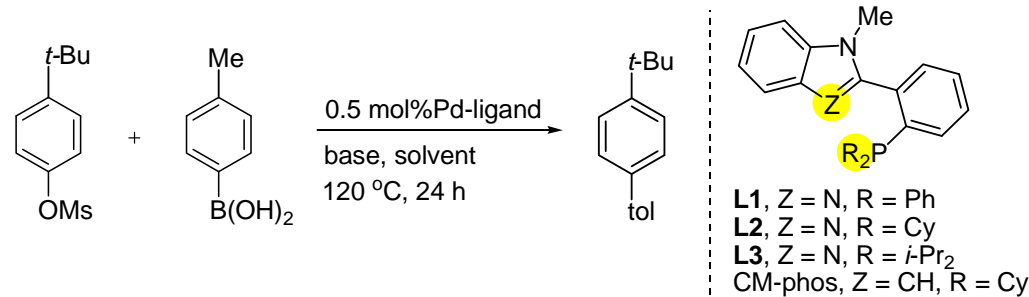

**L1**, Z = N, R = Ph  
**L2**, Z = N, R = Cy  
**L3**, Z = N, R = *t*-Pr<sub>2</sub>  
 CM-phos, Z = CH, R = Cy

| entry | ligand    | M:L | solvent        | base                           | %yield <sup>b</sup> |
|-------|-----------|-----|----------------|--------------------------------|---------------------|
| 1     | <b>L1</b> | 1:2 | <i>t</i> -BuOH | K <sub>3</sub> PO <sub>4</sub> | 2                   |
| 2     | <b>L2</b> | 1:2 | <i>t</i> -BuOH | K <sub>3</sub> PO <sub>4</sub> | 80                  |
| 3     | <b>L3</b> | 1:2 | <i>t</i> -BuOH | K <sub>3</sub> PO <sub>4</sub> | 60                  |
| 4     | CM-phos   | 1:2 | <i>t</i> -BuOH | K <sub>3</sub> PO <sub>4</sub> | 20                  |
| 5     | <b>L2</b> | 1:1 | <i>t</i> -BuOH | K <sub>3</sub> PO <sub>4</sub> | 26                  |

|                 |           |     |                |                                                  |    |
|-----------------|-----------|-----|----------------|--------------------------------------------------|----|
| 6               | <b>L2</b> | 1:3 | <i>t</i> -BuOH | K <sub>3</sub> PO <sub>4</sub>                   | 74 |
| 7               | <b>L2</b> | 1:4 | <i>t</i> -BuOH | K <sub>3</sub> PO <sub>4</sub>                   | 70 |
| 8 <sup>c</sup>  | <b>L2</b> | 1:2 | <i>t</i> -BuOH | K <sub>3</sub> PO <sub>4</sub>                   | 64 |
| 9 <sup>d</sup>  | <b>L2</b> | 1:2 | <i>t</i> -BuOH | K <sub>3</sub> PO <sub>4</sub>                   | 58 |
| 10 <sup>e</sup> | <b>L2</b> | 1:2 | <i>t</i> -BuOH | K <sub>3</sub> PO <sub>4</sub>                   | 51 |
| 11              | <b>L2</b> | 1:2 | toluene        | K <sub>3</sub> PO <sub>4</sub>                   | 53 |
| 12              | <b>L2</b> | 1:2 | dioxane        | K <sub>3</sub> PO <sub>4</sub>                   | 25 |
| 13              | <b>L2</b> | 1:2 | DMF            | K <sub>3</sub> PO <sub>4</sub>                   | 2  |
| 14              | <b>L2</b> | 1:2 | <i>t</i> -BuOH | Cs <sub>2</sub> CO <sub>3</sub>                  | 20 |
| 15              | <b>L2</b> | 1:2 | <i>t</i> -BuOH | CsF                                              | 33 |
| 16              | <b>L2</b> | 1:2 | <i>t</i> -BuOH | K <sub>2</sub> CO <sub>3</sub>                   | 63 |
| 17              | <b>L2</b> | 1:2 | <i>t</i> -BuOH | Na <sub>2</sub> CO <sub>3</sub>                  | 43 |
| 18              | <b>L2</b> | 1:2 | <i>t</i> -BuOH | K <sub>3</sub> PO <sub>4</sub> •H <sub>2</sub> O | 44 |

<sup>a</sup>Reaction conditions: 0.5 mol% of Pd(OAc)<sub>2</sub>, 4-*tert*-butylphenyl mesylate (1.0 mmol), *p*-tolylboronic acid (2.0 mmol), base (3.0 mmol), solvent (3 mL), at 120 °C under N<sub>2</sub> for 24 h.

<sup>b</sup>Calibrated GC yields were reported using dodecane as the internal standard. <sup>c</sup>Pd<sub>2</sub>(dba)<sub>3</sub>. <sup>d</sup>PdCl<sub>2</sub>.

<sup>e</sup>Pd(TFA)<sub>2</sub>.

#### 4. General procedures for palladium-catalyzed Suzuki coupling of aryl mesylates

*General procedure for Suzuki coupling of aryl mesylates:* Pd(OAc)<sub>2</sub> (1.15 mg, 0.05 mmol), Ligand **L2** (Pd:L = 1:2), aryl mesylate (1.0 mmol), arylboronic acid (2 mmol) and base (3 mmol) were loaded into a Schlenk tube equipped with a Teflon-coated magnetic stir bar. The tube was evacuated and flushed with nitrogen (3 cycles). The solvent *tert*-butanol (3-5 mL) was added with continuous stirring at room temperature for 5 minutes. The tube was then placed into a preheated oil bath (120 °C) and stirred for the time period as indicated in Tables. After completion of reaction as judged by GC analysis, the reaction tube was allowed to cool to room temperature and quenched with water and diluted with EtOAc. The organic layer was separated and the aqueous layer was washed with EtOAc. The filtrate was concentrated under reduced pressure. The crude products were purified by flash column chromatography on silica gel (230-400 mesh) to afford the desired product.

## 5. Characterization data for coupling products

### 4'-(*tert*-butyl)-3-methyl-1,1'-biphenyl (1a,b)<sup>4</sup>

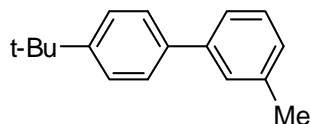

Hexane,  $R_f=0.55$ ;  $^1\text{H NMR}$  (400 MHz,  $\text{CDCl}_3$ )  $\delta$  1.53 (s, 9H), 2.57 (s, 3H), 7.30 (d,  $J=7.2$  Hz, 1H), 7.45-7.49 (m, 1H), 7.55-7.63 (m, 4H), 7.69-7.71 (m, 2H);  $^{13}\text{C NMR}$  (100 MHz,  $\text{CDCl}_3$ )  $\delta$  21.3, 31.2, 34.3, 123.9, 125.4, 126.6, 127.5, 127.6, 128.4, 137.9, 138.2, 140.9, 149.8; MS (EI):  $m/z$  (relative intensity) 224.1 ( $\text{M}^+$ , 33), 209.1 (100), 181.1 (15), 165.1 (12).

### 2-methoxy-1,1'-biphenyl (1c)<sup>5</sup>

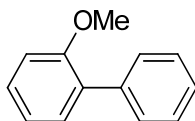

EA:Hexane = 1:9,  $R_f=0.35$ ;  $^1\text{H NMR}$  (400 MHz,  $\text{CDCl}_3$ )  $\delta$  3.97 (s, 3H), 7.17-7.19 (m, 1H), 7.24-7.28 (m, 1H), 7.51-7.55 (m, 3H), 7.62-7.64 (m, 2H), 7.78 (m, 2H);  $^{13}\text{C NMR}$  (100 MHz,  $\text{CDCl}_3$ )  $\delta$  55.6, 111.4, 121.0, 127.1, 128.1, 128.8, 129.7, 130.9, 131.0, 138.8, 156.7; MS (EI):  $m/z$  (relative intensity) 184.1 ( $\text{M}^+$ , 100), 169.1 (53), 141.1 (36), 115.1 (36).

### 5-*o*-tolylbenzo[*d*][1,3]dioxole (1d)<sup>6</sup>

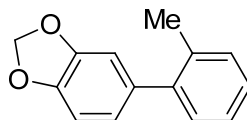

EA:Hexane = 1:4,  $R_f=0.25$ ;  $^1\text{H NMR}$  (400 MHz,  $\text{CDCl}_3$ )  $\delta$  2.45 (s, 3H), 6.10 (s, 2H), 6.94-6.95 (m, 1H), 6.99-7.01 (m, 2H), 7.38-7.40 (m, 4H);  $^{13}\text{C NMR}$  (100 MHz,  $\text{CDCl}_3$ )  $\delta$  20.4, 100.9,

107.9, 109.7, 122.4, 125.6, 127.0, 129.7, 130.2, 135.3, 135.8, 141.5, 146.4, 147.2; MS (EI):  $m/z$  (relative intensity) 212.1 ( $M^+$ , 100), 181.1 (22), 153.1 (42), 115.1 (14).

**2-(2-methoxyphenyl)naphthalene (1e)<sup>7</sup>**

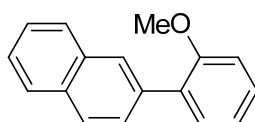

Hexane,  $R_f=0.55$ ;  $^1\text{H NMR}$  (400 MHz,  $\text{CDCl}_3$ )  $\delta$  4.04 (s, 3H), 7.26 (d,  $J=8.4$  Hz, 1H), 7.40 (t,  $J=7.2$  Hz, 1H), 7.63-7.67 (m, 1H), 7.78-7.80 (m, 3H), 8.09 (d,  $J=8.4$  Hz, 1H), 8.17-8.20 (m, 3H), 8.35 (s, 1H);  $^{13}\text{C NMR}$  (100 MHz,  $\text{CDCl}_3$ )  $\delta$  55.3, 111.2, 120.8, 125.6, 125.8, 127.1, 127.5, 128.0, 128.6, 130.5, 131.0, 132.3, 133.3, 136.2, 156.5; MS (EI):  $m/z$  (relative intensity) 234.1 ( $M^+$ , 100), 219.1 (40), 202.1 (10), 191.1 (35).

**2-methoxy-3',5'-dimethyl-1,1'-biphenyl (1f)<sup>8</sup>**

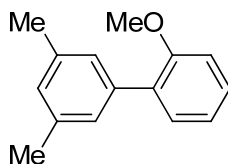

EA:Hexane = 1:9,  $R_f=0.35$ ;  $^1\text{H NMR}$  (400 MHz,  $\text{CDCl}_3$ )  $\delta$  2.60 (s, 6H), 4.00 (s, 3H), 7.16-7.26 (m, 3H), 7.40 (s, 2H), 7.50-7.55 (m, 2H);  $^{13}\text{C NMR}$  (100 MHz,  $\text{CDCl}_3$ )  $\delta$  21.3, 55.4, 111.0, 120.6, 127.3, 128.3, 128.6, 130.8, 130.9, 137.2, 138.4, 156.4; MS (EI):  $m/z$  (relative intensity) 212 ( $M^+$ , 100), 197.1 (61), 182.1 (46), 165.1 (16).

**4-methoxy-1,1'-biphenyl (1g)<sup>9</sup>**

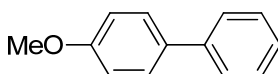

DCM,  $R_f=0.2$ ;  $^1\text{H}$  NMR (400 MHz,  $\text{CDCl}_3$ )  $\delta$  3.94 (s, 3H), 7.12 (d,  $J=6.8$  Hz, 2H), 7.43-7.47 (m, 1H), 7.54-7.57 (t,  $J=6.8$  Hz, 2H), 7.67-7.72 (m, 4H);  $^{13}\text{C}$  NMR (100 MHz,  $\text{CDCl}_3$ )  $\delta$  55.1, 114.1, 126.5, 126.6, 128.0, 128.6, 133.6, 140.7, 159.1; MS (EI):  $m/z$  (relative intensity) 184.1 ( $\text{M}^+$ , 100), 169.1 (50), 141.1 (46), 115.1 (34).

**1-([1,1'-biphenyl]-4-yl)ethanone (1h)<sup>10</sup>**

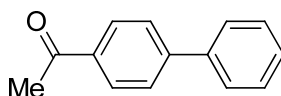

Hexane,  $R_f=0.5$ ;  $^1\text{H}$  NMR (400 MHz,  $\text{CDCl}_3$ )  $\delta$  2.62 (s, 3H), 7.41-7.49 (m, 3H), 7.62-7.68 (m, 4H), 8.03 (d,  $J=8.4$  Hz, 2H);  $^{13}\text{C}$  NMR (100 MHz,  $\text{CDCl}_3$ )  $\delta$  26.3, 126.9, 127.0, 128.0, 128.6, 128.7, 135.6, 139.5, 145.4, 197.3; MS (EI):  $m/z$  (relative intensity) 196.1 ( $\text{M}^+$ , 47), 181.1 (100), 152.1 (54), 76.1 (8).

**1-(2-methoxy-[1,1'-biphenyl]-4-yl)ethanone (1i)<sup>11</sup>**

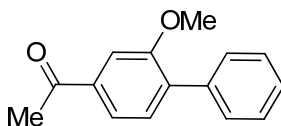

EA:Hexane = 1:9,  $R_f=0.3$ ;  $^1\text{H}$  NMR (400 MHz,  $\text{CDCl}_3$ )  $\delta$  2.66 (s, 3H), 3.89 (s, 3H), 7.41-7.49 (m, 4H), 7.59-7.65 (m, 4H);  $^{13}\text{C}$  NMR (100 MHz,  $\text{CDCl}_3$ )  $\delta$  26.4, 55.4, 109.8, 121.5, 127.4, 127.9, 129.2, 130.6, 135.4, 137.1, 137.2, 156.5, 197.3; MS (EI):  $m/z$  (relative intensity) 226.1 ( $\text{M}^+$ , 67), 211.1 (100), 183.1 (10), 168.1 (27).

**[1,1'-biphenyl]-3-carbonitrile (1j)<sup>12</sup>**

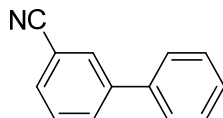

EA:Hexane = 1:9,  $R_f=0.15$ ;  $^1\text{H NMR}$  (400 MHz,  $\text{CDCl}_3$ )  $\delta$  7.44-7.51 (m, 3H), 7.54-7.57 (m, 3H), 7.61-7.63 (m, 1H), 7.79-7.82 (m, 2H);  $^{13}\text{C NMR}$  (100 MHz,  $\text{CDCl}_3$ )  $\delta$  112.6, 118.5, 126.7, 128.1, 128.8, 129.3, 130.3, 130.4, 131.1, 138.4, 142.0; MS (EI):  $m/z$  (relative intensity) 179.1 ( $\text{M}^+$ , 100), 151.0 (13), 76.0 (8), 63.1 (5); HRMS: calcd. for  $\text{C}_{24}\text{H}_{19}\text{NO}$ : 347.2244, found 347.2253.

**[1,1'-biphenyl]-4-yl(phenyl)methanone (1k)<sup>13</sup>**

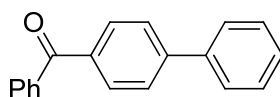

Hexane,  $R_f=0.55$ ;  $^1\text{H NMR}$  (400 MHz,  $\text{CDCl}_3$ )  $\delta$  7.43-7.46 (m, 1H), 7.53 (q,  $J=7.2$  Hz, 6H), 7.61-7.65 (m, 1H), 7.69-7.75 (m, 4H), 7.89-7.96 (m, 4H);  $^{13}\text{C NMR}$  (100 MHz,  $\text{CDCl}_3$ )  $\delta$  126.7, 127.1, 128.0, 128.1, 128.8, 129.8, 130.5, 132.2, 136.0, 137.5, 139.7, 144.9, 196.0; MS (EI):  $m/z$  (relative intensity) 258.1 ( $\text{M}^+$ , 76), 181.1 (100), 152.1 (46), 105.1 (20).

**3'-methyl-[1,1'-biphenyl]-4-carbaldehyde (1l)<sup>14</sup>**

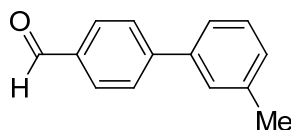

EA:Hexane = 1:9,  $R_f=0.4$ ;  $^1\text{H NMR}$  (400 MHz,  $\text{CDCl}_3$ )  $\delta$  2.48 (s, 3H), 7.26-7.28 (m, 1H), 7.38-7.48 (m, 3H), 7.75-7.77 (m, 2H), 7.95-7.97 (m, 2H), 10.06 (s, 1H);  $^{13}\text{C NMR}$  (100 Hz,  $\text{CDCl}_3$ )  $\delta$  21.3, 124.3, 127.4, 127.9, 128.7, 129.1, 130.0, 134.9, 138.4, 139.4, 147.1, 191.7; MS (EI):  $m/z$  (relative intensity) 196.1 ( $\text{M}^+$ , 100), 165.1 (36), 152.1 (47), 115.1 (7).

**5-phenylbenzo[d][1,3]dioxole (1m)<sup>15</sup>**

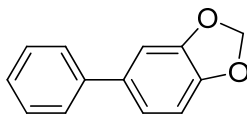

EA:Hexane = 1:4,  $R_f=0.4$ ;  $^1\text{H NMR}$  (400 MHz,  $\text{CDCl}_3$ )  $\delta$  6.06 (s, 2H), 6.99 (t,  $J=6.8$  Hz, 1H), 7.15-7.21 (m, 2H), 7.39-7.45 (m, 1H), 7.49-7.54 (m, 2H), 7.61-7.65 (m, 2H);  $^{13}\text{C NMR}$  (100 MHz,  $\text{CDCl}_3$ )  $\delta$  101.0, 107.6, 108.5, 120.5, 126.8, 128.7, 135.5, 140.9, 147.0, 148.1; MS (EI):  $m/z$  (relative intensity) 198.1 ( $\text{M}^+$ , 100), 139.1 (48), 98.8 (10), 63.1 (5).

**Ethyl [1,1'-biphenyl]-4-carboxylate (1n)<sup>13</sup>**

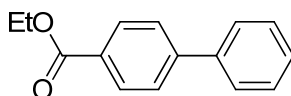

Hexane,  $R_f=0.55$ ;  $^1\text{H NMR}$  (400 MHz,  $\text{CDCl}_3$ )  $\delta$  1.46 (t,  $J=6.8$  Hz, 3H), 4.45 (q,  $J=7.2$  Hz, 2H), 7.42-7.50 (m, 3H), 7.63-7.69 (m, 4H), 8.18 (d,  $J=8.0$  Hz, 2H);  $^{13}\text{C NMR}$  (100 MHz,  $\text{CDCl}_3$ )  $\delta$  14.1, 60.7, 126.7, 127.0, 127.8, 128.6, 129.0, 129.8, 139.7, 145.2, 166.1; MS (EI):  $m/z$  (relative intensity) 210 ( $\text{M}^+$ , 65), 195 (100), 180 (30), 152 (25).

**Ethyl 4-(naphthalen-1-yl)benzoate (1o)<sup>16</sup>**

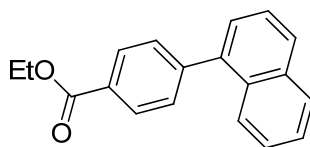

DCM:Hexane = 1:20,  $R_f=0.35$ ;  $^1\text{H NMR}$  (400 MHz,  $\text{CDCl}_3$ )  $\delta$  1.52 (t,  $J=6.8$  Hz, 3H), 4.54 (q,  $J=6.8$  Hz, 2H), 7.47-7.50 (m, 2H), 7.56-7.58 (m, 2H), 7.64 (d,  $J=6.8$  Hz, 2H), 7.93-7.98 (m, 3H); 8.30 (d,  $J=7.2$  Hz, 2H)  $^{13}\text{C NMR}$  (100 MHz,  $\text{CDCl}_3$ )  $\delta$  14.2, 60.7, 125.1, 125.4, 125.7, 126.1,



126.7, 128.0, 128.2, 129.2, 129.3, 129.8, 131.0, 133.6, 138.9, 145.2, 166.2; MS (EI):  $m/z$  (relative intensity) 276.1 ( $M^+$ , 100), 248.1 (13), 231.1 (51), 202.1 (70).

**5-(naphthalen-2-yl)benzo[*d*][1,3]dioxole (1p)<sup>17</sup>**

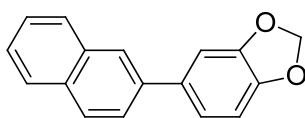

EA:Hexane = 3:7,  $R_f=0.5$ ;  $^1\text{H}$  NMR (400 MHz,  $\text{CDCl}_3$ )  $\delta$  6.09 (s, 2H), 7.04 (d,  $J=8.0$  Hz, 1H), 7.29-7.32 (m, 1H), 7.35 (s, 1H), 7.59-7.62 (m, 2H), 7.79 (d,  $J=8.8$  Hz, 1H), 7.97-7.99 (m, 3H), 8.08 (s, 1H);  $^{13}\text{C}$  NMR (100 MHz,  $\text{CDCl}_3$ )  $\delta$  101.1, 107.7, 108.5, 120.8, 125.1, 125.3, 125.6, 126.2, 127.5, 128.0, 128.3, 132.3, 133.6, 135.3, 138.1, 147.1, 148.1 MS (EI):  $m/z$  (relative intensity) 248.1 ( $M^+$ , 100), 189.1 (46), 123.7 (12), 94.5 (7).

**2-methyl-5-*o*-tolylbenzo[*d*]thiazole (2a)<sup>18</sup>**

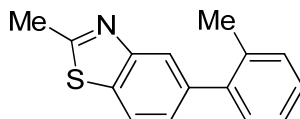

EA:Hexane = 1:20,  $R_f=0.4$ ;  $^1\text{H}$  NMR (400 MHz,  $\text{CDCl}_3$ )  $\delta$  2.36 (s, 3H), 2.84 (s, 3H), 7.31-7.35 (m, 5H), 7.82 (d,  $J=8.0$  Hz, 1H), 8.03 (s, 1H), 7.93-7.98 (m, 4H);  $^{13}\text{C}$  NMR (100 MHz,  $\text{CDCl}_3$ )  $\delta$  19.7, 20.2, 120.5, 122.5, 125.8, 125.5, 127.1, 129.6, 130.1, 133.9, 135.0, 139.7, 141.0, 153.2, 167.0; MS (EI):  $m/z$  (relative intensity) 239.1 ( $M^+$ , 100), 197.0 (21), 165.1 (50), 1552.1 (12).

### 3-phenylfuran (2b)<sup>19</sup>

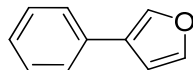

EA:Hexane = 1:4,  $R_f=0.7$ ;  $^1\text{H NMR}$  (400 MHz,  $\text{CDCl}_3$ )  $\delta$  6.80 (s, 1H), 7.36-7.38 (m, 1H), 7.50-7.49 (m, 2H), 7.56-7.60 (m, 3H), 7.82-7.83 (m, 1H);  $^{13}\text{C NMR}$  (100 MHz,  $\text{CDCl}_3$ )  $\delta$  108.8, 125.8, 126.4, 126.9, 128.7, 132.4, 138.4, 143.6; MS (EI):  $m/z$  (relative intensity) 144.1 ( $\text{M}^+$ , 96), 115.1 (100), 89.1 (15), 63.1 (13).

### 3-(naphthalen-2-yl)furan (2c)

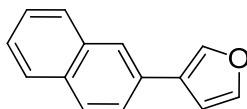

EA:Hexane = 1:4,  $R_f=0.3$ ;  $^1\text{H NMR}$  (400 MHz,  $\text{CDCl}_3$ )  $\delta$  6.94 (s, 1H), 7.57-7.64 (m, 3H), 7.72 (d,  $J=8.4$  Hz, 1H), 7.93-7.96 (m, 4H), 8.04 (s, 1H);  $^{13}\text{C NMR}$  (100 MHz,  $\text{CDCl}_3$ )  $\delta$  108.8, 123.9, 124.4, 125.6, 126.3, 126.4, 127.6, 127.8, 128.4, 129.7, 132.5, 133.7, 138.8, 143.7; MS (EI):  $m/z$  (relative intensity) 194.1 ( $\text{M}^+$ , 100), 165.1 (76), 139.1 (10), 115.1 (6).  $\text{C}_{26}\text{H}_{21}\text{N}_2\text{PH}^+$ : 194.0732, found 194.0738

### 5-(2-methoxyphenyl)-2-methylbenzo[d]thiazole (2d)<sup>20</sup>

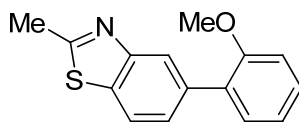

EA:Hexane = 1:20,  $R_f=0.4$ ;  $^1\text{H NMR}$  (400 MHz,  $\text{CDCl}_3$ )  $\delta$  2.85 (s, 3H), 3.82 (s, 3H), 7.02 (d,  $J=8.0$  Hz, 1H), 7.09 (t,  $J=7.6$  Hz, 1H), 7.35-7.39 (m, 1H), 7.43-7.45 (m, 1H), 7.57-7.59 (m, 1H), 7.84 (d,  $J=8.0$  Hz, 1H), 8.24 (s, 1H);  $^{13}\text{C NMR}$  (100 MHz,  $\text{CDCl}_3$ )  $\delta$  19.8, 55.1, 111.0, 120.4,

120.6, 123.0, 126.2, 128.5, 129.8, 130.7, 133.9, 136.3, 153.2, 156.2, 166.7; MS (EI):  $m/z$  (relative intensity) 255.1 ( $M^+$ , 100), 240.0 (26), 199.0 (31), 171.0 (12).

**2-(naphthalen-1-yl)pyridine (2e)**<sup>21</sup>

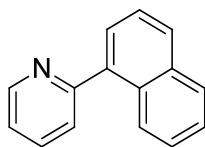

EA:Hexane = 1:20,  $R_f=0.4$ ;  $^1H$  NMR (400 MHz,  $CDCl_3$ )  $\delta$  7.29-7.31 (m, 1H), 7.52-7.61 (m, 4H), 7.65-7.67 (m, 1H), 7.75-7.79 (m, 1H), 7.95(d,  $J=8.0$  Hz, 2H), 8.19 (d,  $J=6.8$  Hz, 1H), 8.84-8.85 (m, 1H);  $^{13}C$  NMR (100 MHz,  $CDCl_3$ )  $\delta$  121.7, 124.8, 125.0, 125.4, 125.6, 126.2, 127.2, 128.1, 128.6, 130.9, 133.7, 136.1, 138.3, 149.2, 59.0; MS (EI):  $m/z$  (relative intensity) 205.1 ( $M^+$ , 38), 176.1 (10), 102.1 (8), 88.1 (4).

**4-methyl-2-(naphthalen-1-yl)pyridine (2f)**<sup>22</sup>

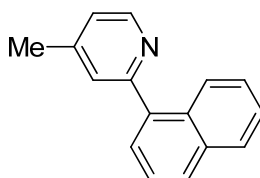

EA:Hexane = 1:20,  $R_f=0.4$ ;  $^1H$  NMR (400 MHz,  $CDCl_3$ )  $\delta$  2.39 (s, 3H), 7.12 (s, 1H), 7.41 (s, 1H), 7.51-7.65 (m, 4H), 7.93 (d,  $J=6.8$  Hz, 2H), 8.17-8.20 (m, 1H), 8.69 (d,  $J=4.8$  Hz, 2H);  $^{13}C$  NMR (100 MHz,  $CDCl_3$ )  $\delta$  20.8, 122.7, 125.0, 125.4, 125.5, 125.6, 126.1, 127.0, 128.0, 128.4, 131.0, 133.6, 138.4, 147.1, 148.9, 159.8; MS (EI):  $m/z$  (relative intensity) 219.1 ( $M^+$ , 41), 204.1 (11), 189.1 (5), 108.7 (7).

## 6. X-ray crystal data of complex Pd-L2

Table 1. Crystal data and structure refinement for BCSOCM43 (31 Mar 2011).

|                                   |                                                                                                      |                  |
|-----------------------------------|------------------------------------------------------------------------------------------------------|------------------|
| Identification code               | socm43                                                                                               |                  |
| Empirical formula                 | PdCl <sub>2</sub> (C <sub>26</sub> H <sub>33</sub> N <sub>2</sub> P)·CH <sub>2</sub> Cl <sub>2</sub> |                  |
| Formula weight                    | 666.74                                                                                               |                  |
| Temperature                       | 296(2) K                                                                                             |                  |
| Wavelength                        | 0.71073 Å                                                                                            |                  |
| Crystal system                    | Triclinic                                                                                            |                  |
| Space group                       | P-1                                                                                                  |                  |
| Unit cell dimensions              | a = 9.2097(6) Å                                                                                      | α = 99.428(6)°.  |
|                                   | b = 10.1097(6) Å                                                                                     | β = 97.595(6)°.  |
|                                   | c = 18.0481(16) Å                                                                                    | γ = 113.505(4)°. |
| Volume                            | 1483.49(19) Å <sup>3</sup>                                                                           |                  |
| Z                                 | 2                                                                                                    |                  |
| Density (calculated)              | 1.493 Mg/m <sup>3</sup>                                                                              |                  |
| Absorption coefficient            | 1.059 mm <sup>-1</sup>                                                                               |                  |
| F(000)                            | 680                                                                                                  |                  |
| Crystal size                      | 0.50 x 0.40 x 0.18 mm <sup>3</sup>                                                                   |                  |
| Theta range for data collection   | 2.29 to 27.87°.                                                                                      |                  |
| Index ranges                      | -12 ≤ h ≤ 12, -13 ≤ k ≤ 13, -23 ≤ l ≤ 23                                                             |                  |
| Reflections collected             | 26578                                                                                                |                  |
| Independent reflections           | 6987 [R(int) = 0.4427]                                                                               |                  |
| Completeness to theta = 27.87°    | 98.8 %                                                                                               |                  |
| Absorption correction             | Semi-empirical from equivalents                                                                      |                  |
| Max. and min. transmission        | 0.8323 and 0.6196                                                                                    |                  |
| Refinement method                 | Full-matrix least-squares on F <sup>2</sup>                                                          |                  |
| Data / restraints / parameters    | 6987 / 4 / 335                                                                                       |                  |
| Goodness-of-fit on F <sup>2</sup> | 1.001                                                                                                |                  |
| Final R indices [I > 2σ(I)]       | R1 = 0.0716, wR2 = 0.1649                                                                            |                  |
| R indices (all data)              | R1 = 0.2766, wR2 = 0.2023                                                                            |                  |
| Largest diff. peak and hole       | 1.156 and -0.928 e.Å <sup>-3</sup>                                                                   |                  |

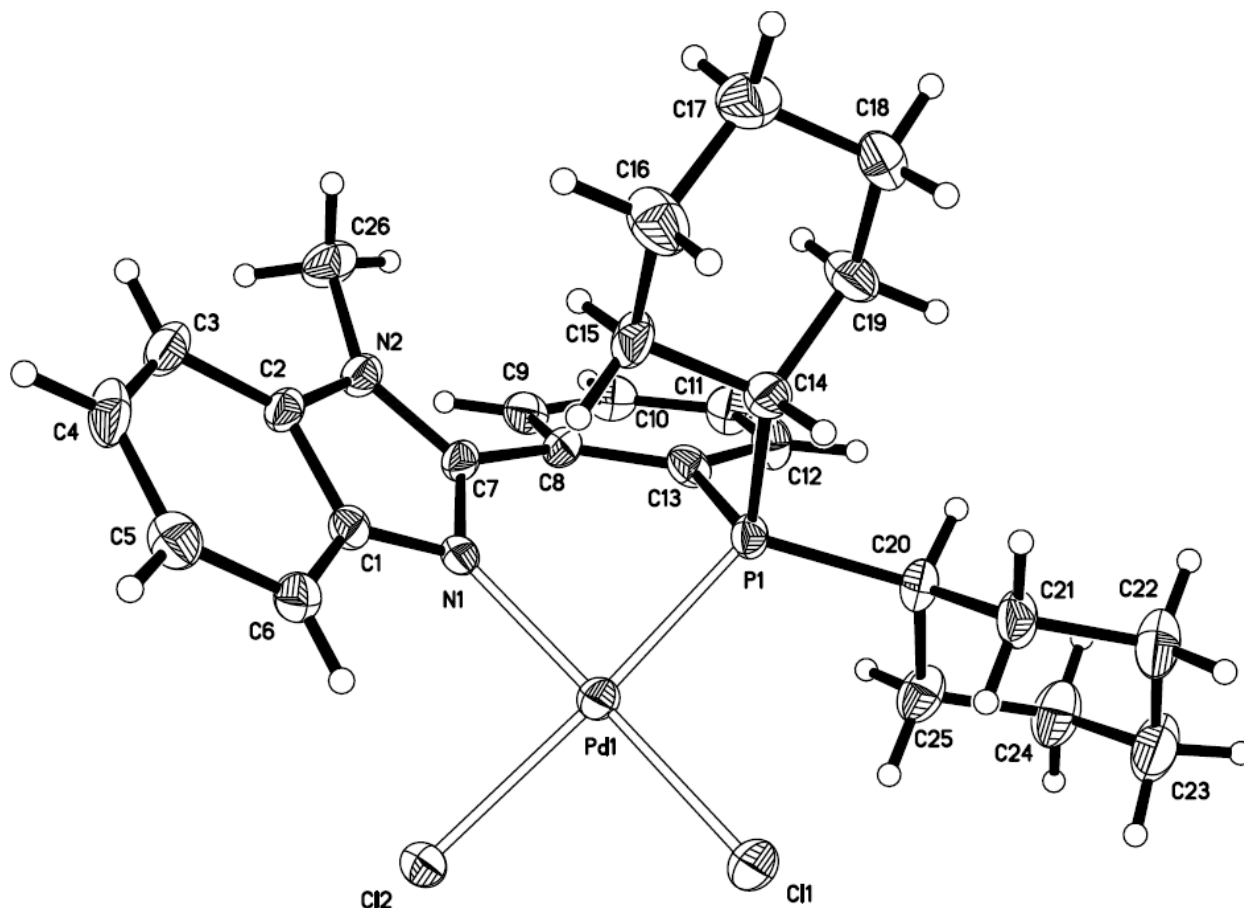

ORTEP representation of complex Pd-L2 (30% probability ellipsoids). Hydrogen atoms have been omitted for clarity. Selected bond distances (Å) and angles (deg): Pd(1)-N(1), 2.011(2); Pd(1)-P(1), 2.2493(8); Pd(1)-Cl(1), 2.2969(9); Pd(1)-Cl(2), 2.3744(8); P(1)-C(20), 1.837(3); P(1)-C(14), 1.846(4); P(1)-C(13), 1.854(3); N(1)-C(1), 1.393(3); N(1)-C(7), 1.336(4); N(1)-Pd(1)-P(1), 86.05(7); N(1)-Pd(1)-Cl(1), 170.26(7); P(1)-Pd(1)-Cl(1), 96.35(3); N(1)-Pd(1)-Cl(2), 88.90(7).

Table 2. Atomic coordinates ( $\times 10^4$ ) and equivalent isotropic displacement parameters ( $\text{\AA}^2 \times 10^3$ ) for socm43.  $U(\text{eq})$  is defined as one third of the trace of the orthogonalized  $U^{ij}$  tensor.

|       | x        | y       | z       | $U(\text{eq})$ |
|-------|----------|---------|---------|----------------|
| Pd(1) | 3051(1)  | 4581(1) | 1733(1) | 32(1)          |
| Cl(1) | 5470(1)  | 4711(1) | 2347(1) | 55(1)          |
| Cl(2) | 2934(1)  | 2789(1) | 669(1)  | 39(1)          |
| P(1)  | 3106(1)  | 6536(1) | 2558(1) | 31(1)          |
| N(1)  | 758(2)   | 4175(2) | 1276(1) | 31(1)          |
| N(2)  | -1514(2) | 4408(2) | 939(1)  | 35(1)          |
| C(1)  | -536(2)  | 2786(2) | 1162(1) | 32(1)          |
| C(2)  | -1993(3) | 2912(2) | 944(1)  | 33(1)          |
| C(3)  | -3512(3) | 1723(2) | 809(2)  | 46(1)          |
| C(4)  | -3518(3) | 392(2)  | 891(2)  | 51(1)          |
| C(5)  | -2051(3) | 257(2)  | 1096(2) | 46(1)          |
| C(6)  | -566(3)  | 1429(2) | 1241(1) | 38(1)          |
| C(7)  | 115(2)   | 5110(2) | 1144(1) | 31(1)          |
| C(8)  | 1072(2)  | 6735(2) | 1293(1) | 32(1)          |
| C(9)  | 635(2)   | 7481(2) | 775(1)  | 41(1)          |
| C(10) | 1477(3)  | 9019(2) | 910(1)  | 45(1)          |
| C(11) | 2675(3)  | 9794(2) | 1552(2) | 47(1)          |
| C(12) | 3105(3)  | 9039(2) | 2067(1) | 45(1)          |
| C(13) | 2334(3)  | 7501(2) | 1932(1) | 35(1)          |
| C(14) | 1820(3)  | 6082(2) | 3267(1) | 38(1)          |
| C(15) | 157(3)   | 4788(2) | 2968(2) | 45(1)          |
| C(16) | -727(4)  | 4410(3) | 3613(2) | 62(1)          |
| C(17) | -876(3)  | 5760(3) | 4053(2) | 60(1)          |
| C(18) | 762(3)   | 7058(3) | 4347(2) | 58(1)          |
| C(19) | 1656(3)  | 7439(2) | 3709(2) | 52(1)          |
| C(20) | 5076(3)  | 7983(2) | 3123(1) | 40(1)          |
| C(21) | 5793(3)  | 7607(2) | 3833(1) | 46(1)          |
| C(22) | 7332(4)  | 8959(3) | 4290(2) | 65(1)          |
| C(23) | 8574(4)  | 9528(3) | 3818(2) | 73(1)          |
| C(24) | 7872(4)  | 9866(3) | 3108(2) | 64(1)          |
| C(25) | 6343(3)  | 8514(2) | 2629(1) | 49(1)          |

|        |          |          |         |        |
|--------|----------|----------|---------|--------|
| C(26)  | -2697(2) | 5018(2)  | 741(2)  | 51(1)  |
| C(27)  | 3677(5)  | 12408(5) | 3633(3) | 104(3) |
| Cl(3)  | 3009(2)  | 13463(2) | 4233(1) | 155(1) |
| C(27') | 4530(7)  | 13278(8) | 3910(6) | 102(4) |
| Cl(3') | 2405(4)  | 12363(4) | 3585(3) | 208(2) |
| Cl(4)  | 5091(1)  | 11933(1) | 4110(1) | 114(1) |

---

Table 3. Bond lengths [Å] and angles [°] for socm43.

---

|              |            |
|--------------|------------|
| Pd(1)-N(1)   | 2.0113(17) |
| Pd(1)-P(1)   | 2.2493(6)  |
| Pd(1)-Cl(1)  | 2.2969(7)  |
| Pd(1)-Cl(2)  | 2.3744(6)  |
| P(1)-C(20)   | 1.8371(19) |
| P(1)-C(14)   | 1.846(3)   |
| P(1)-C(13)   | 1.854(2)   |
| N(1)-C(7)    | 1.336(3)   |
| N(1)-C(1)    | 1.392(2)   |
| N(2)-C(7)    | 1.345(3)   |
| N(2)-C(2)    | 1.397(3)   |
| N(2)-C(26)   | 1.483(3)   |
| C(1)-C(6)    | 1.393(3)   |
| C(1)-C(2)    | 1.408(3)   |
| C(2)-C(3)    | 1.391(3)   |
| C(3)-C(4)    | 1.376(4)   |
| C(3)-H(3A)   | 0.9300     |
| C(4)-C(5)    | 1.418(4)   |
| C(4)-H(4A)   | 0.9300     |
| C(5)-C(6)    | 1.361(3)   |
| C(5)-H(5A)   | 0.9300     |
| C(6)-H(6A)   | 0.9300     |
| C(7)-C(8)    | 1.479(2)   |
| C(8)-C(13)   | 1.385(3)   |
| C(8)-C(9)    | 1.406(3)   |
| C(9)-C(10)   | 1.393(2)   |
| C(9)-H(9A)   | 0.9300     |
| C(10)-C(11)  | 1.360(3)   |
| C(10)-H(10A) | 0.9300     |
| C(11)-C(12)  | 1.407(4)   |
| C(11)-H(11A) | 0.9300     |
| C(12)-C(13)  | 1.390(2)   |
| C(12)-H(12A) | 0.9300     |
| C(14)-C(15)  | 1.517(3)   |



|              |          |
|--------------|----------|
| C(14)-C(19)  | 1.544(3) |
| C(14)-H(14A) | 0.9800   |
| C(15)-C(16)  | 1.521(4) |
| C(15)-H(15A) | 0.9700   |
| C(15)-H(15B) | 0.9700   |
| C(16)-C(17)  | 1.528(4) |
| C(16)-H(16A) | 0.9700   |
| C(16)-H(16B) | 0.9700   |
| C(17)-C(18)  | 1.503(3) |
| C(17)-H(17A) | 0.9700   |
| C(17)-H(17B) | 0.9700   |
| C(18)-C(19)  | 1.514(4) |
| C(18)-H(18A) | 0.9700   |
| C(18)-H(18B) | 0.9700   |
| C(19)-H(19A) | 0.9700   |
| C(19)-H(19B) | 0.9700   |
| C(20)-C(21)  | 1.536(4) |
| C(20)-C(25)  | 1.541(4) |
| C(20)-H(20A) | 0.9800   |
| C(21)-C(22)  | 1.528(3) |
| C(21)-H(21A) | 0.9700   |
| C(21)-H(21B) | 0.9700   |
| C(22)-C(23)  | 1.503(5) |
| C(22)-H(22A) | 0.9700   |
| C(22)-H(22B) | 0.9700   |
| C(23)-C(24)  | 1.509(5) |
| C(23)-H(23A) | 0.9700   |
| C(23)-H(23B) | 0.9700   |
| C(24)-C(25)  | 1.534(3) |
| C(24)-H(24A) | 0.9700   |
| C(24)-H(24B) | 0.9700   |
| C(25)-H(25A) | 0.9700   |
| C(25)-H(25B) | 0.9700   |
| C(26)-H(26A) | 0.9600   |
| C(26)-H(26B) | 0.9600   |
| C(26)-H(26C) | 0.9600   |

|                   |            |
|-------------------|------------|
| C(27)-Cl(4)       | 1.733(5)   |
| C(27)-Cl(3)       | 1.735(5)   |
| C(27)-H(27A)      | 0.9700     |
| C(27)-H(27B)      | 0.9700     |
| C(27')-Cl(4)      | 1.707(9)   |
| C(27')-Cl(3')     | 1.762(6)   |
| C(27')-H(27C)     | 0.9700     |
| C(27')-H(27D)     | 0.9700     |
|                   |            |
| N(1)-Pd(1)-P(1)   | 86.05(5)   |
| N(1)-Pd(1)-Cl(1)  | 170.26(5)  |
| P(1)-Pd(1)-Cl(1)  | 96.35(2)   |
| N(1)-Pd(1)-Cl(2)  | 88.90(5)   |
| P(1)-Pd(1)-Cl(2)  | 168.21(2)  |
| Cl(1)-Pd(1)-Cl(2) | 90.41(2)   |
| C(20)-P(1)-C(14)  | 104.89(10) |
| C(20)-P(1)-C(13)  | 104.10(9)  |
| C(14)-P(1)-C(13)  | 108.17(11) |
| C(20)-P(1)-Pd(1)  | 118.79(9)  |
| C(14)-P(1)-Pd(1)  | 115.72(6)  |
| C(13)-P(1)-Pd(1)  | 104.21(7)  |
| C(7)-N(1)-C(1)    | 106.59(17) |
| C(7)-N(1)-Pd(1)   | 130.31(11) |
| C(1)-N(1)-Pd(1)   | 122.26(14) |
| C(7)-N(2)-C(2)    | 108.34(18) |
| C(7)-N(2)-C(26)   | 129.19(16) |
| C(2)-N(2)-C(26)   | 122.46(16) |
| N(1)-C(1)-C(6)    | 130.9(2)   |
| N(1)-C(1)-C(2)    | 108.61(17) |
| C(6)-C(1)-C(2)    | 120.48(17) |
| C(3)-C(2)-N(2)    | 132.2(2)   |
| C(3)-C(2)-C(1)    | 122.7(2)   |
| N(2)-C(2)-C(1)    | 105.02(16) |
| C(4)-C(3)-C(2)    | 116.0(3)   |
| C(4)-C(3)-H(3A)   | 122.0      |
| C(2)-C(3)-H(3A)   | 122.0      |

|                    |            |
|--------------------|------------|
| C(3)-C(4)-C(5)     | 121.3(2)   |
| C(3)-C(4)-H(4A)    | 119.3      |
| C(5)-C(4)-H(4A)    | 119.3      |
| C(6)-C(5)-C(4)     | 122.6(2)   |
| C(6)-C(5)-H(5A)    | 118.7      |
| C(4)-C(5)-H(5A)    | 118.7      |
| C(5)-C(6)-C(1)     | 116.9(2)   |
| C(5)-C(6)-H(6A)    | 121.5      |
| C(1)-C(6)-H(6A)    | 121.5      |
| N(1)-C(7)-N(2)     | 111.43(15) |
| N(1)-C(7)-C(8)     | 123.66(17) |
| N(2)-C(7)-C(8)     | 124.6(2)   |
| C(13)-C(8)-C(9)    | 121.13(15) |
| C(13)-C(8)-C(7)    | 120.93(19) |
| C(9)-C(8)-C(7)     | 117.92(16) |
| C(10)-C(9)-C(8)    | 119.53(17) |
| C(10)-C(9)-H(9A)   | 120.2      |
| C(8)-C(9)-H(9A)    | 120.2      |
| C(11)-C(10)-C(9)   | 120.1(2)   |
| C(11)-C(10)-H(10A) | 120.0      |
| C(9)-C(10)-H(10A)  | 120.0      |
| C(10)-C(11)-C(12)  | 120.01(18) |
| C(10)-C(11)-H(11A) | 120.0      |
| C(12)-C(11)-H(11A) | 120.0      |
| C(13)-C(12)-C(11)  | 121.27(19) |
| C(13)-C(12)-H(12A) | 119.4      |
| C(11)-C(12)-H(12A) | 119.4      |
| C(8)-C(13)-C(12)   | 117.9(2)   |
| C(8)-C(13)-P(1)    | 122.20(13) |
| C(12)-C(13)-P(1)   | 119.78(16) |
| C(15)-C(14)-C(19)  | 109.7(2)   |
| C(15)-C(14)-P(1)   | 116.15(17) |
| C(19)-C(14)-P(1)   | 113.01(15) |
| C(15)-C(14)-H(14A) | 105.7      |
| C(19)-C(14)-H(14A) | 105.7      |
| P(1)-C(14)-H(14A)  | 105.7      |

|                     |            |
|---------------------|------------|
| C(14)-C(15)-C(16)   | 111.7(2)   |
| C(14)-C(15)-H(15A)  | 109.3      |
| C(16)-C(15)-H(15A)  | 109.3      |
| C(14)-C(15)-H(15B)  | 109.3      |
| C(16)-C(15)-H(15B)  | 109.3      |
| H(15A)-C(15)-H(15B) | 107.9      |
| C(15)-C(16)-C(17)   | 111.0(2)   |
| C(15)-C(16)-H(16A)  | 109.4      |
| C(17)-C(16)-H(16A)  | 109.4      |
| C(15)-C(16)-H(16B)  | 109.4      |
| C(17)-C(16)-H(16B)  | 109.4      |
| H(16A)-C(16)-H(16B) | 108.0      |
| C(18)-C(17)-C(16)   | 110.9(3)   |
| C(18)-C(17)-H(17A)  | 109.5      |
| C(16)-C(17)-H(17A)  | 109.5      |
| C(18)-C(17)-H(17B)  | 109.5      |
| C(16)-C(17)-H(17B)  | 109.5      |
| H(17A)-C(17)-H(17B) | 108.1      |
| C(17)-C(18)-C(19)   | 112.2(2)   |
| C(17)-C(18)-H(18A)  | 109.2      |
| C(19)-C(18)-H(18A)  | 109.2      |
| C(17)-C(18)-H(18B)  | 109.2      |
| C(19)-C(18)-H(18B)  | 109.2      |
| H(18A)-C(18)-H(18B) | 107.9      |
| C(18)-C(19)-C(14)   | 111.2(2)   |
| C(18)-C(19)-H(19A)  | 109.4      |
| C(14)-C(19)-H(19A)  | 109.4      |
| C(18)-C(19)-H(19B)  | 109.4      |
| C(14)-C(19)-H(19B)  | 109.4      |
| H(19A)-C(19)-H(19B) | 108.0      |
| C(21)-C(20)-C(25)   | 110.5(2)   |
| C(21)-C(20)-P(1)    | 115.09(14) |
| C(25)-C(20)-P(1)    | 113.02(16) |
| C(21)-C(20)-H(20A)  | 105.8      |
| C(25)-C(20)-H(20A)  | 105.8      |
| P(1)-C(20)-H(20A)   | 105.8      |

|                     |          |
|---------------------|----------|
| C(22)-C(21)-C(20)   | 109.4(2) |
| C(22)-C(21)-H(21A)  | 109.8    |
| C(20)-C(21)-H(21A)  | 109.8    |
| C(22)-C(21)-H(21B)  | 109.8    |
| C(20)-C(21)-H(21B)  | 109.8    |
| H(21A)-C(21)-H(21B) | 108.2    |
| C(23)-C(22)-C(21)   | 113.2(3) |
| C(23)-C(22)-H(22A)  | 108.9    |
| C(21)-C(22)-H(22A)  | 108.9    |
| C(23)-C(22)-H(22B)  | 108.9    |
| C(21)-C(22)-H(22B)  | 108.9    |
| H(22A)-C(22)-H(22B) | 107.7    |
| C(22)-C(23)-C(24)   | 111.5(3) |
| C(22)-C(23)-H(23A)  | 109.3    |
| C(24)-C(23)-H(23A)  | 109.3    |
| C(22)-C(23)-H(23B)  | 109.3    |
| C(24)-C(23)-H(23B)  | 109.3    |
| H(23A)-C(23)-H(23B) | 108.0    |
| C(23)-C(24)-C(25)   | 111.3(2) |
| C(23)-C(24)-H(24A)  | 109.4    |
| C(25)-C(24)-H(24A)  | 109.4    |
| C(23)-C(24)-H(24B)  | 109.4    |
| C(25)-C(24)-H(24B)  | 109.4    |
| H(24A)-C(24)-H(24B) | 108.0    |
| C(24)-C(25)-C(20)   | 110.4(2) |
| C(24)-C(25)-H(25A)  | 109.6    |
| C(20)-C(25)-H(25A)  | 109.6    |
| C(24)-C(25)-H(25B)  | 109.6    |
| C(20)-C(25)-H(25B)  | 109.6    |
| H(25A)-C(25)-H(25B) | 108.1    |
| N(2)-C(26)-H(26A)   | 109.5    |
| N(2)-C(26)-H(26B)   | 109.5    |
| H(26A)-C(26)-H(26B) | 109.5    |
| N(2)-C(26)-H(26C)   | 109.5    |
| H(26A)-C(26)-H(26C) | 109.5    |
| H(26B)-C(26)-H(26C) | 109.5    |

|                      |          |
|----------------------|----------|
| Cl(4)-C(27)-Cl(3)    | 114.2(3) |
| Cl(4)-C(27)-H(27A)   | 108.7    |
| Cl(3)-C(27)-H(27A)   | 108.7    |
| Cl(4)-C(27)-H(27B)   | 108.7    |
| Cl(3)-C(27)-H(27B)   | 108.7    |
| H(27A)-C(27)-H(27B)  | 107.6    |
| Cl(4)-C(27')-Cl(3')  | 105.0(4) |
| Cl(4)-C(27')-H(27C)  | 110.7    |
| Cl(3')-C(27')-H(27C) | 110.7    |
| Cl(4)-C(27')-H(27D)  | 110.7    |
| Cl(3')-C(27')-H(27D) | 110.7    |
| H(27C)-C(27')-H(27D) | 108.8    |
| C(27')-Cl(4)-C(27)   | 30.9(2)  |

---

Symmetry transformations used to generate equivalent atoms:

Table 4. Anisotropic displacement parameters ( $\text{\AA}^2 \times 10^3$ ) for socm43. The anisotropic displacement factor exponent takes the form:  $-2\pi^2 [ h^2 a^{*2} U^{11} + \dots + 2 h k a^* b^* U^{12} ]$

|       | U <sup>11</sup> | U <sup>22</sup> | U <sup>33</sup> | U <sup>23</sup> | U <sup>13</sup> | U <sup>12</sup> |
|-------|-----------------|-----------------|-----------------|-----------------|-----------------|-----------------|
| Pd(1) | 32(1)           | 37(1)           | 29(1)           | 7(1)            | 4(1)            | 18(1)           |
| Cl(1) | 51(1)           | 75(1)           | 43(1)           | 1(1)            | -7(1)           | 40(1)           |
| Cl(2) | 41(1)           | 37(1)           | 38(1)           | 4(1)            | 7(1)            | 20(1)           |
| P(1)  | 32(1)           | 34(1)           | 25(1)           | 4(1)            | 0(1)            | 13(1)           |
| N(1)  | 33(1)           | 35(1)           | 25(1)           | -1(1)           | 3(1)            | 18(1)           |
| N(2)  | 27(1)           | 42(1)           | 33(1)           | 8(1)            | 3(1)            | 14(1)           |
| C(1)  | 33(1)           | 35(1)           | 24(1)           | 4(1)            | 7(1)            | 13(1)           |
| C(2)  | 24(1)           | 45(1)           | 24(1)           | 5(1)            | 4(1)            | 10(1)           |
| C(3)  | 26(1)           | 56(1)           | 43(1)           | 7(1)            | 1(1)            | 9(1)            |
| C(4)  | 42(2)           | 41(1)           | 40(1)           | 4(1)            | 6(1)            | -8(1)           |
| C(5)  | 51(1)           | 43(1)           | 43(1)           | 8(1)            | 13(1)           | 18(1)           |
| C(6)  | 36(1)           | 35(1)           | 40(1)           | 6(1)            | 8(1)            | 13(1)           |
| C(7)  | 26(1)           | 40(1)           | 24(1)           | 5(1)            | 3(1)            | 13(1)           |
| C(8)  | 27(1)           | 36(1)           | 32(1)           | 9(1)            | 3(1)            | 14(1)           |
| C(9)  | 47(1)           | 54(1)           | 29(1)           | 10(1)           | 6(1)            | 31(1)           |
| C(10) | 55(1)           | 45(1)           | 49(1)           | 23(1)           | 15(1)           | 29(1)           |
| C(11) | 51(1)           | 39(1)           | 52(1)           | 13(1)           | 7(1)            | 21(1)           |
| C(12) | 50(1)           | 43(1)           | 35(1)           | 5(1)            | -2(1)           | 17(1)           |
| C(13) | 47(1)           | 39(1)           | 26(1)           | 8(1)            | 10(1)           | 24(1)           |
| C(14) | 38(1)           | 44(1)           | 34(1)           | 9(1)            | 9(1)            | 19(1)           |
| C(15) | 27(1)           | 42(1)           | 45(1)           | 4(1)            | 6(1)            | -5(1)           |
| C(16) | 77(2)           | 54(1)           | 47(2)           | 9(1)            | 26(2)           | 16(1)           |
| C(17) | 54(2)           | 64(1)           | 62(2)           | 14(1)           | 27(1)           | 20(1)           |
| C(18) | 58(2)           | 58(1)           | 43(2)           | -8(1)           | 8(1)            | 18(1)           |
| C(19) | 63(1)           | 53(1)           | 39(1)           | 3(1)            | 21(1)           | 25(1)           |
| C(20) | 33(1)           | 37(1)           | 37(1)           | 4(1)            | -4(1)           | 9(1)            |
| C(21) | 46(1)           | 56(1)           | 27(1)           | 5(1)            | -3(1)           | 17(1)           |
| C(22) | 55(2)           | 70(1)           | 47(2)           | 4(1)            | -10(2)          | 15(1)           |
| C(23) | 46(2)           | 94(2)           | 57(2)           | 9(1)            | -7(2)           | 16(1)           |
| C(24) | 43(2)           | 55(1)           | 69(2)           | 15(1)           | 1(2)            | -1(1)           |
| C(25) | 36(1)           | 57(1)           | 46(1)           | 22(1)           | 6(1)            | 9(1)            |

|        |        |        |        |        |        |        |
|--------|--------|--------|--------|--------|--------|--------|
| C(26)  | 40(1)  | 69(1)  | 56(1)  | 20(1)  | 5(1)   | 34(1)  |
| C(27)  | 127(4) | 162(4) | 58(5)  | 23(3)  | 28(4)  | 97(3)  |
| Cl(3)  | 227(1) | 173(1) | 195(2) | 123(1) | 129(1) | 161(1) |
| C(27') | 52(6)  | 94(5)  | 106(6) | 41(4)  | -5(5)  | -22(4) |
| Cl(3') | 121(2) | 295(3) | 267(4) | 157(2) | 72(3)  | 105(2) |
| Cl(4)  | 134(1) | 135(1) | 96(1)  | 26(1)  | 35(1)  | 79(1)  |

---



Table 5. Hydrogen coordinates ( $\times 10^4$ ) and isotropic displacement parameters ( $\text{\AA}^2 \times 10^3$ ) for socm43.

|        | x     | y     | z    | U(eq) |
|--------|-------|-------|------|-------|
| H(3A)  | -4467 | 1822  | 673  | 55    |
| H(4A)  | -4503 | -437  | 809  | 61    |
| H(5A)  | -2105 | -668  | 1133 | 56    |
| H(6A)  | 385   | 1328  | 1386 | 46    |
| H(9A)  | -209  | 6953  | 346  | 49    |
| H(10A) | 1218  | 9515  | 561  | 54    |
| H(11A) | 3211  | 10824 | 1651 | 57    |
| H(12A) | 3921  | 9580  | 2507 | 54    |
| H(14A) | 2399  | 5783  | 3653 | 46    |
| H(15A) | 275   | 3926  | 2713 | 54    |
| H(15B) | -484  | 5036  | 2592 | 54    |
| H(16A) | -140  | 4071  | 3965 | 75    |
| H(16B) | -1801 | 3609  | 3399 | 75    |
| H(17A) | -1570 | 6027  | 3716 | 72    |
| H(17B) | -1373 | 5512  | 4483 | 72    |
| H(18A) | 1408  | 6827  | 4730 | 70    |
| H(18B) | 627   | 7915  | 4595 | 70    |
| H(19A) | 2726  | 8242  | 3928 | 62    |
| H(19B) | 1072  | 7777  | 3355 | 62    |
| H(20A) | 4878  | 8843  | 3320 | 48    |
| H(21A) | 5006  | 7328  | 4154 | 55    |
| H(21B) | 6046  | 6775  | 3673 | 55    |
| H(22A) | 7043  | 9748  | 4495 | 78    |
| H(22B) | 7808  | 8698  | 4722 | 78    |
| H(23A) | 8970  | 8791  | 3666 | 88    |
| H(23B) | 9486  | 10423 | 4128 | 88    |
| H(24A) | 8676  | 10156 | 2797 | 77    |
| H(24B) | 7604  | 10692 | 3259 | 77    |
| H(25A) | 6627  | 7716  | 2436 | 59    |
| H(25B) | 5886  | 8775  | 2192 | 59    |

|        |       |       |      |     |
|--------|-------|-------|------|-----|
| H(26A) | -2125 | 6058  | 766  | 77  |
| H(26B) | -3397 | 4881  | 1099 | 77  |
| H(26C) | -3333 | 4509  | 229  | 77  |
| H(27A) | 2748  | 11505 | 3344 | 124 |
| H(27B) | 4152  | 12959 | 3267 | 124 |
| H(27C) | 5041  | 13701 | 3515 | 122 |
| H(27D) | 4833  | 14065 | 4368 | 122 |

---

Table 6. Torsion angles [°] for socm43.

---

|                        |             |
|------------------------|-------------|
| N(1)-Pd(1)-P(1)-C(20)  | -164.79(11) |
| Cl(1)-Pd(1)-P(1)-C(20) | 24.69(9)    |
| Cl(2)-Pd(1)-P(1)-C(20) | -99.92(13)  |
| N(1)-Pd(1)-P(1)-C(14)  | 69.05(10)   |
| Cl(1)-Pd(1)-P(1)-C(14) | -101.48(9)  |
| Cl(2)-Pd(1)-P(1)-C(14) | 133.91(12)  |
| N(1)-Pd(1)-P(1)-C(13)  | -49.57(9)   |
| Cl(1)-Pd(1)-P(1)-C(13) | 139.90(7)   |
| Cl(2)-Pd(1)-P(1)-C(13) | 15.29(13)   |
| P(1)-Pd(1)-N(1)-C(7)   | 39.6(2)     |
| Cl(1)-Pd(1)-N(1)-C(7)  | 144.3(2)    |
| Cl(2)-Pd(1)-N(1)-C(7)  | -129.7(2)   |
| P(1)-Pd(1)-N(1)-C(1)   | -128.44(17) |
| Cl(1)-Pd(1)-N(1)-C(1)  | -23.8(4)    |
| Cl(2)-Pd(1)-N(1)-C(1)  | 62.22(17)   |
| C(7)-N(1)-C(1)-C(6)    | -178.1(2)   |
| Pd(1)-N(1)-C(1)-C(6)   | -7.6(3)     |
| C(7)-N(1)-C(1)-C(2)    | 0.8(2)      |
| Pd(1)-N(1)-C(1)-C(2)   | 171.36(15)  |
| C(7)-N(2)-C(2)-C(3)    | 177.2(3)    |
| C(26)-N(2)-C(2)-C(3)   | -2.3(4)     |
| C(7)-N(2)-C(2)-C(1)    | -0.2(2)     |
| C(26)-N(2)-C(2)-C(1)   | -179.7(2)   |
| N(1)-C(1)-C(2)-C(3)    | -178.1(2)   |
| C(6)-C(1)-C(2)-C(3)    | 1.0(4)      |
| N(1)-C(1)-C(2)-N(2)    | -0.4(2)     |
| C(6)-C(1)-C(2)-N(2)    | 178.7(2)    |
| N(2)-C(2)-C(3)-C(4)    | -177.9(3)   |
| C(1)-C(2)-C(3)-C(4)    | -0.9(4)     |
| C(2)-C(3)-C(4)-C(5)    | -0.3(4)     |
| C(3)-C(4)-C(5)-C(6)    | 1.6(4)      |
| C(4)-C(5)-C(6)-C(1)    | -1.5(4)     |
| N(1)-C(1)-C(6)-C(5)    | 179.1(2)    |
| C(2)-C(1)-C(6)-C(5)    | 0.2(4)      |

|                         |             |
|-------------------------|-------------|
| C(1)-N(1)-C(7)-N(2)     | -1.0(3)     |
| Pd(1)-N(1)-C(7)-N(2)    | -170.47(15) |
| C(1)-N(1)-C(7)-C(8)     | 172.4(2)    |
| Pd(1)-N(1)-C(7)-C(8)    | 2.9(3)      |
| C(2)-N(2)-C(7)-N(1)     | 0.8(3)      |
| C(26)-N(2)-C(7)-N(1)    | -179.8(2)   |
| C(2)-N(2)-C(7)-C(8)     | -172.6(2)   |
| C(26)-N(2)-C(7)-C(8)    | 6.8(4)      |
| N(1)-C(7)-C(8)-C(13)    | -38.3(3)    |
| N(2)-C(7)-C(8)-C(13)    | 134.2(2)    |
| N(1)-C(7)-C(8)-C(9)     | 143.1(2)    |
| N(2)-C(7)-C(8)-C(9)     | -44.3(3)    |
| C(13)-C(8)-C(9)-C(10)   | -0.5(4)     |
| C(7)-C(8)-C(9)-C(10)    | 178.0(2)    |
| C(8)-C(9)-C(10)-C(11)   | -2.2(4)     |
| C(9)-C(10)-C(11)-C(12)  | 2.2(4)      |
| C(10)-C(11)-C(12)-C(13) | 0.5(4)      |
| C(9)-C(8)-C(13)-C(12)   | 3.1(4)      |
| C(7)-C(8)-C(13)-C(12)   | -175.4(2)   |
| C(9)-C(8)-C(13)-P(1)    | -172.31(19) |
| C(7)-C(8)-C(13)-P(1)    | 9.2(3)      |
| C(11)-C(12)-C(13)-C(8)  | -3.1(4)     |
| C(11)-C(12)-C(13)-P(1)  | 172.4(2)    |
| C(20)-P(1)-C(13)-C(8)   | 164.2(2)    |
| C(14)-P(1)-C(13)-C(8)   | -84.6(2)    |
| Pd(1)-P(1)-C(13)-C(8)   | 39.0(2)     |
| C(20)-P(1)-C(13)-C(12)  | -11.1(2)    |
| C(14)-P(1)-C(13)-C(12)  | 100.1(2)    |
| Pd(1)-P(1)-C(13)-C(12)  | -136.3(2)   |
| C(20)-P(1)-C(14)-C(15)  | -173.81(19) |
| C(13)-P(1)-C(14)-C(15)  | 75.5(2)     |
| Pd(1)-P(1)-C(14)-C(15)  | -40.9(2)    |
| C(20)-P(1)-C(14)-C(19)  | 58.06(19)   |
| C(13)-P(1)-C(14)-C(19)  | -52.58(17)  |
| Pd(1)-P(1)-C(14)-C(19)  | -169.00(14) |
| C(19)-C(14)-C(15)-C(16) | -56.2(3)    |

|                           |             |
|---------------------------|-------------|
| P(1)-C(14)-C(15)-C(16)    | 174.1(2)    |
| C(14)-C(15)-C(16)-C(17)   | 56.6(3)     |
| C(15)-C(16)-C(17)-C(18)   | -55.1(3)    |
| C(16)-C(17)-C(18)-C(19)   | 55.3(4)     |
| C(17)-C(18)-C(19)-C(14)   | -55.8(3)    |
| C(15)-C(14)-C(19)-C(18)   | 55.4(3)     |
| P(1)-C(14)-C(19)-C(18)    | -173.25(18) |
| C(14)-P(1)-C(20)-C(21)    | 51.4(2)     |
| C(13)-P(1)-C(20)-C(21)    | 164.94(19)  |
| Pd(1)-P(1)-C(20)-C(21)    | -79.8(2)    |
| C(14)-P(1)-C(20)-C(25)    | 179.61(18)  |
| C(13)-P(1)-C(20)-C(25)    | -66.8(2)    |
| Pd(1)-P(1)-C(20)-C(25)    | 48.4(2)     |
| C(25)-C(20)-C(21)-C(22)   | 56.3(3)     |
| P(1)-C(20)-C(21)-C(22)    | -174.2(2)   |
| C(20)-C(21)-C(22)-C(23)   | -55.6(4)    |
| C(21)-C(22)-C(23)-C(24)   | 55.1(4)     |
| C(22)-C(23)-C(24)-C(25)   | -54.6(4)    |
| C(23)-C(24)-C(25)-C(20)   | 56.3(4)     |
| C(21)-C(20)-C(25)-C(24)   | -57.5(3)    |
| P(1)-C(20)-C(25)-C(24)    | 171.9(2)    |
| Cl(3')-C(27')-Cl(4)-C(27) | 20.6(4)     |
| Cl(3)-C(27)-Cl(4)-C(27')  | -57.1(7)    |

---

Symmetry transformations used to generate equivalent atoms:

Table 7. Hydrogen bonds for socm43 [ $\text{\AA}$  and  $^\circ$ ].

| D-H...A                | d(D-H) | d(H...A) | d(D...A) | $\angle(\text{DHA})$ |
|------------------------|--------|----------|----------|----------------------|
| C(27)-H(27B)...Cl(1)#1 | 0.97   | 2.67     | 3.640(5) | 174.5                |

Symmetry transformations used to generate equivalent atoms:

#1  $x, y+1, z$

### 7. $^1\text{H}$ , $^{13}\text{C}$ , $^{31}\text{P}$ NMR, MS and HRMS spectra

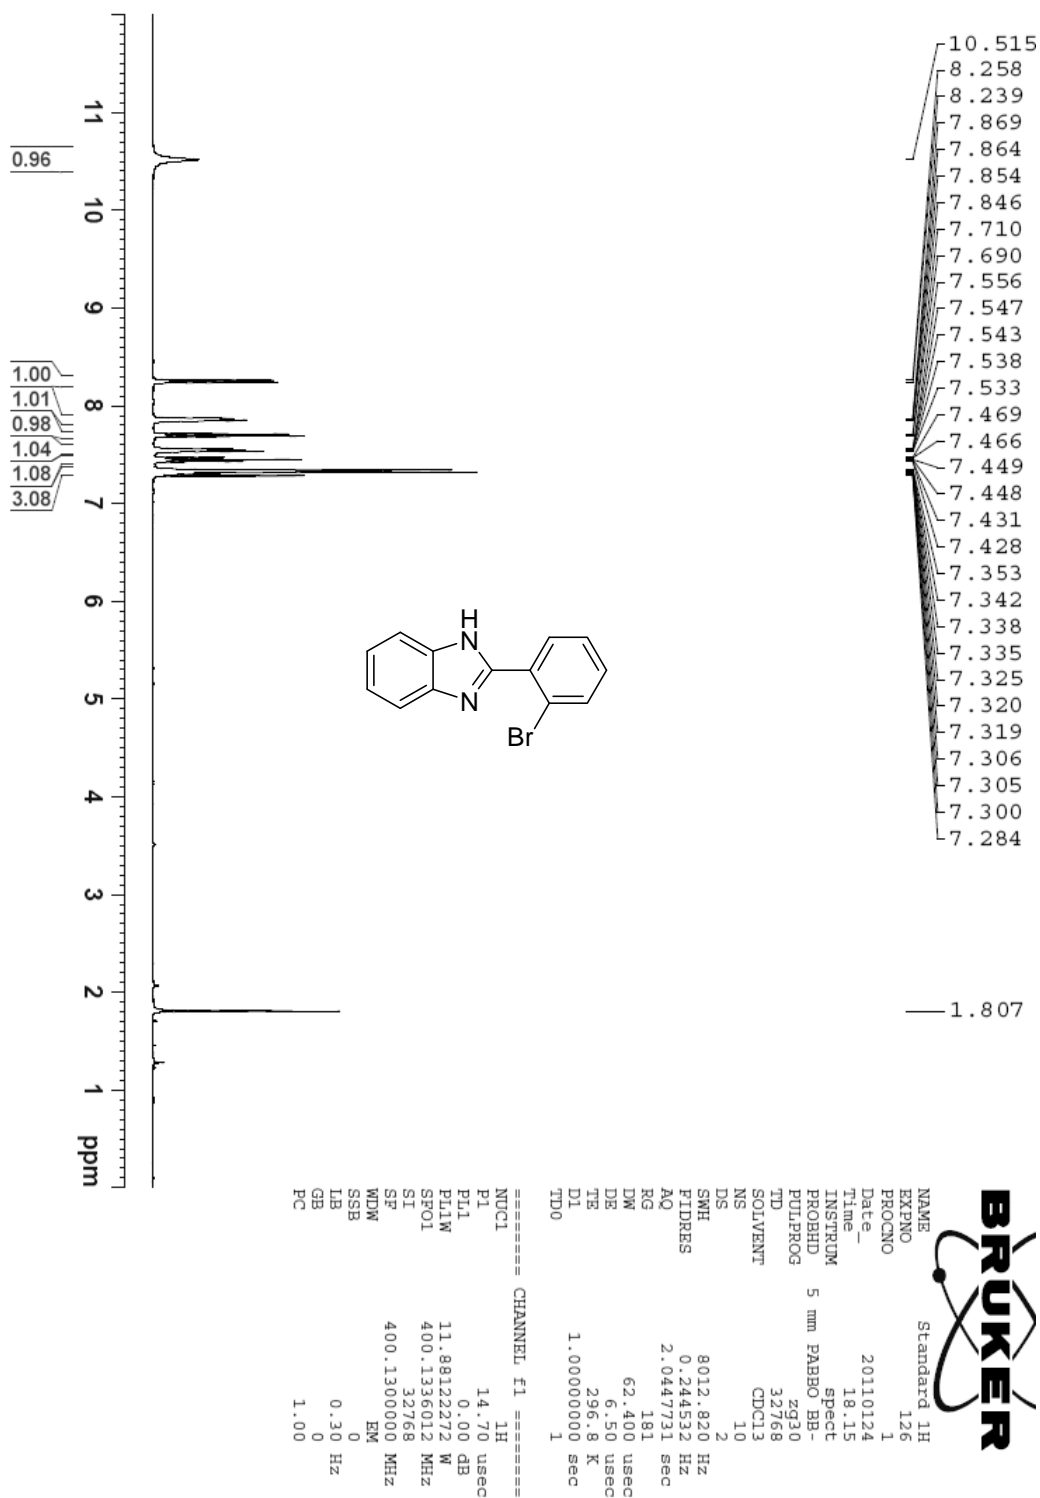

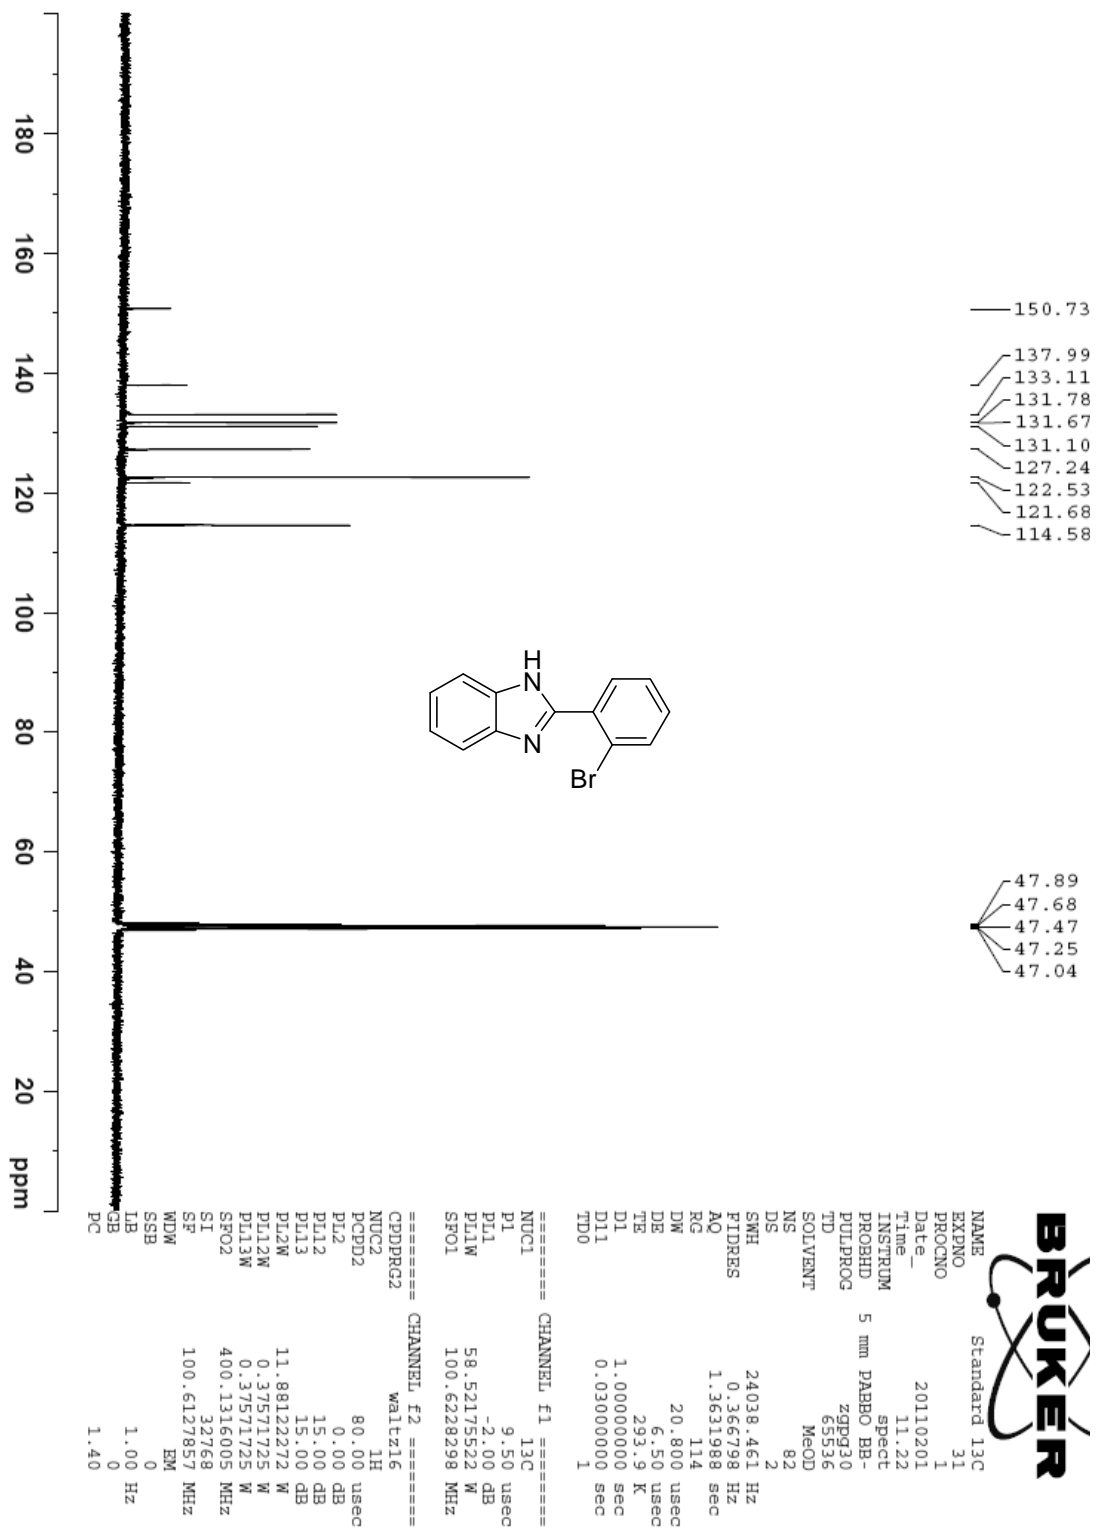



File : C:\MSDCHEM\1\DATA\HO\Snapshot\CL-CU-L1.D  
Operator : Seam  
Acquired : 26 Jan 2011 13:51 using AcqMethod METHOD2A.M  
Instrument : 5973N  
Sample Name :  
Misc Info :  
Vial Number: 2

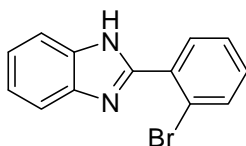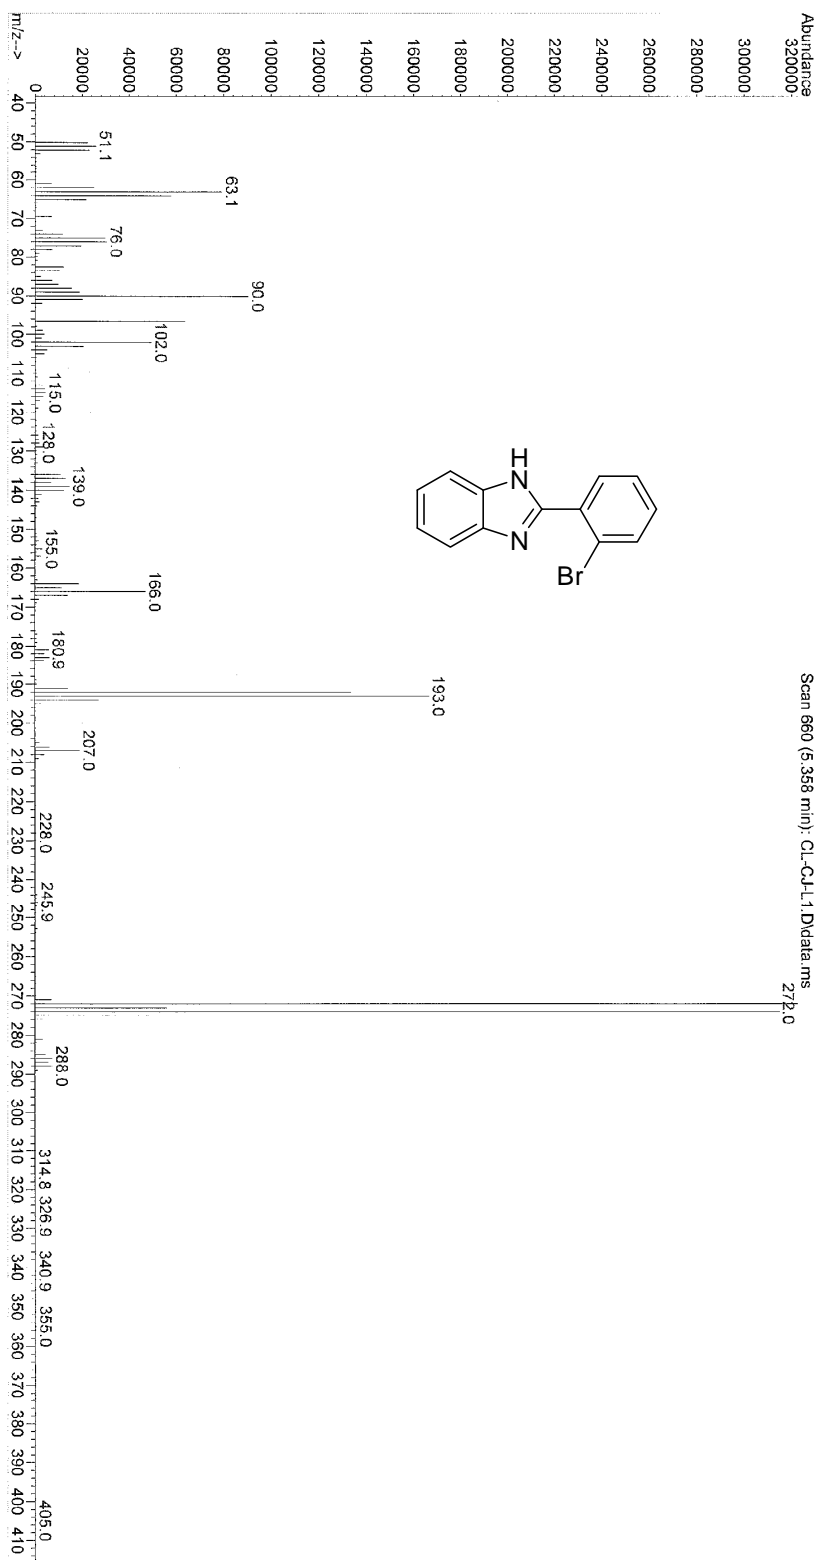

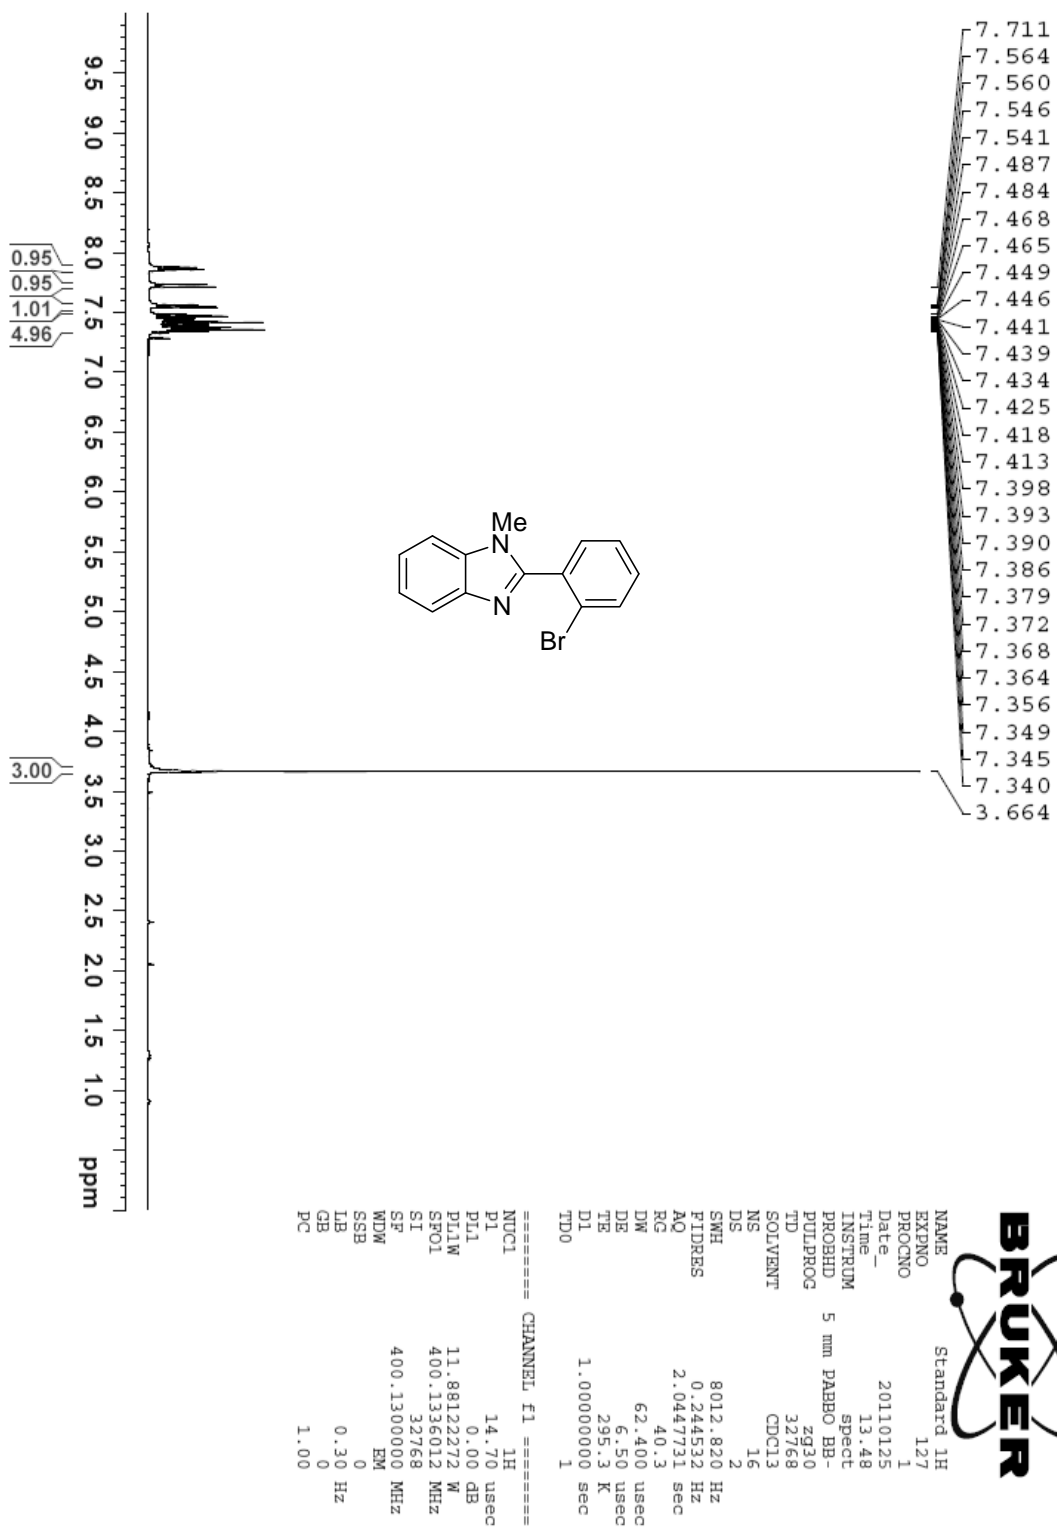

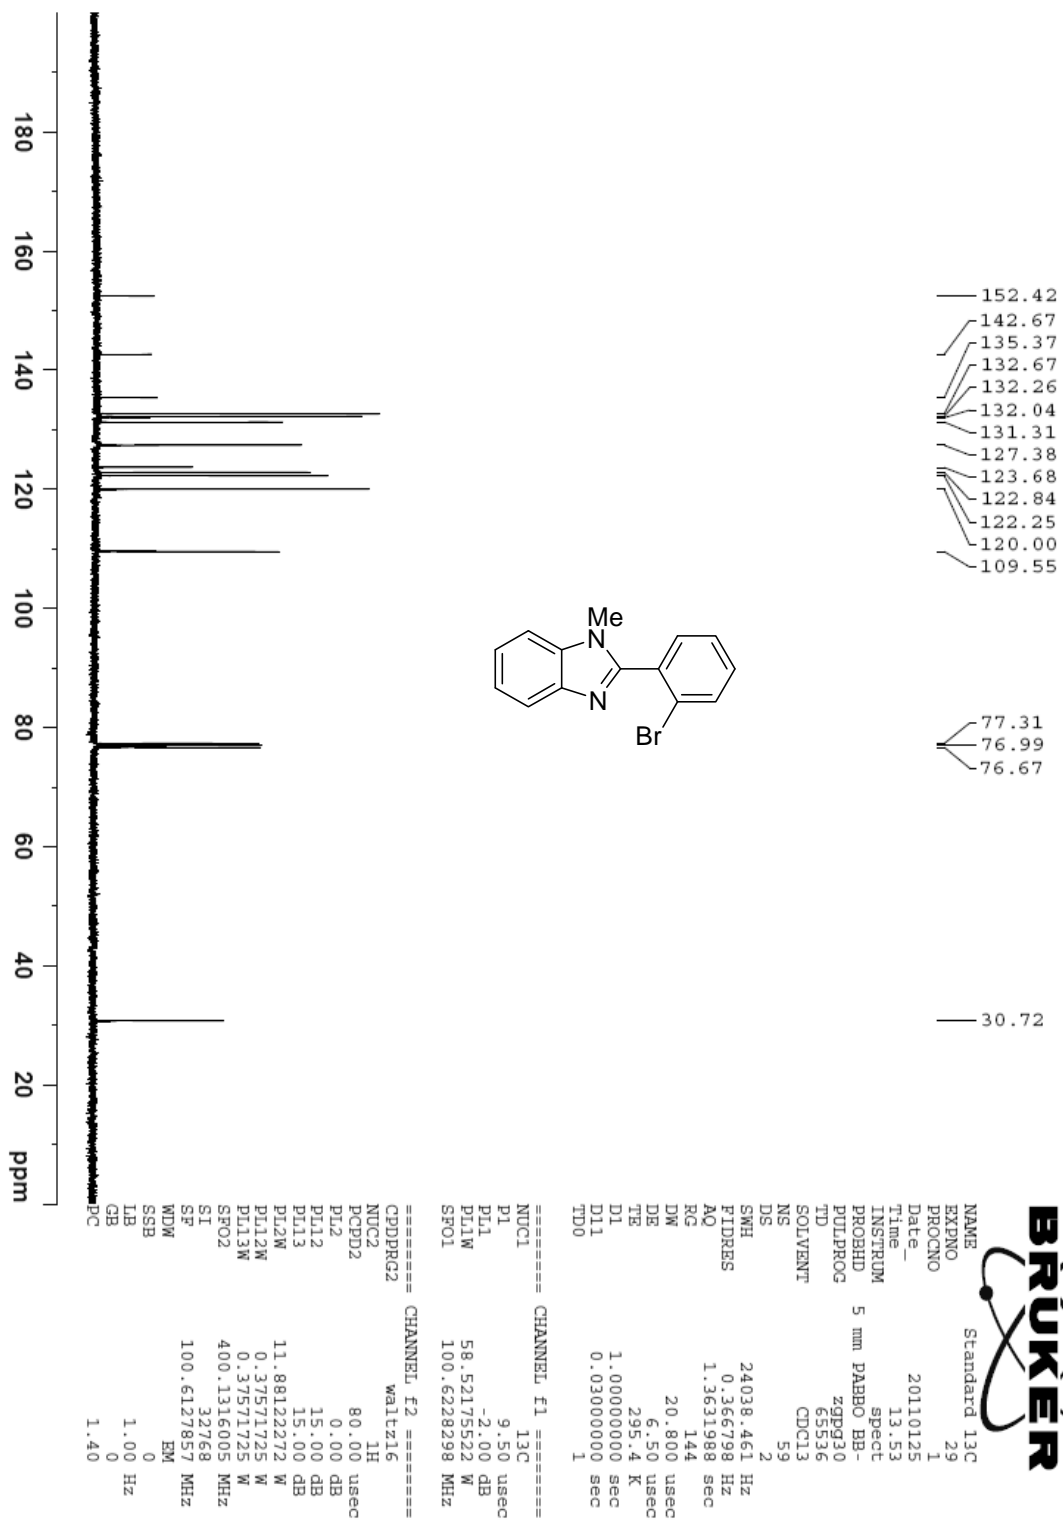

File : C:\MSDCHEM\1\DATA\HO\Snapshot\CL-CJ-L1.D  
Operator : Seam  
Acquired : 26 Jan 2011 13:51 using AcqMethod METH0D2A.M  
Instrument : 5973N  
Sample Name :  
Misc Info :  
Vial Number: 2

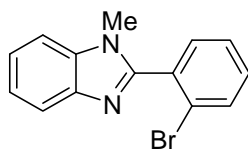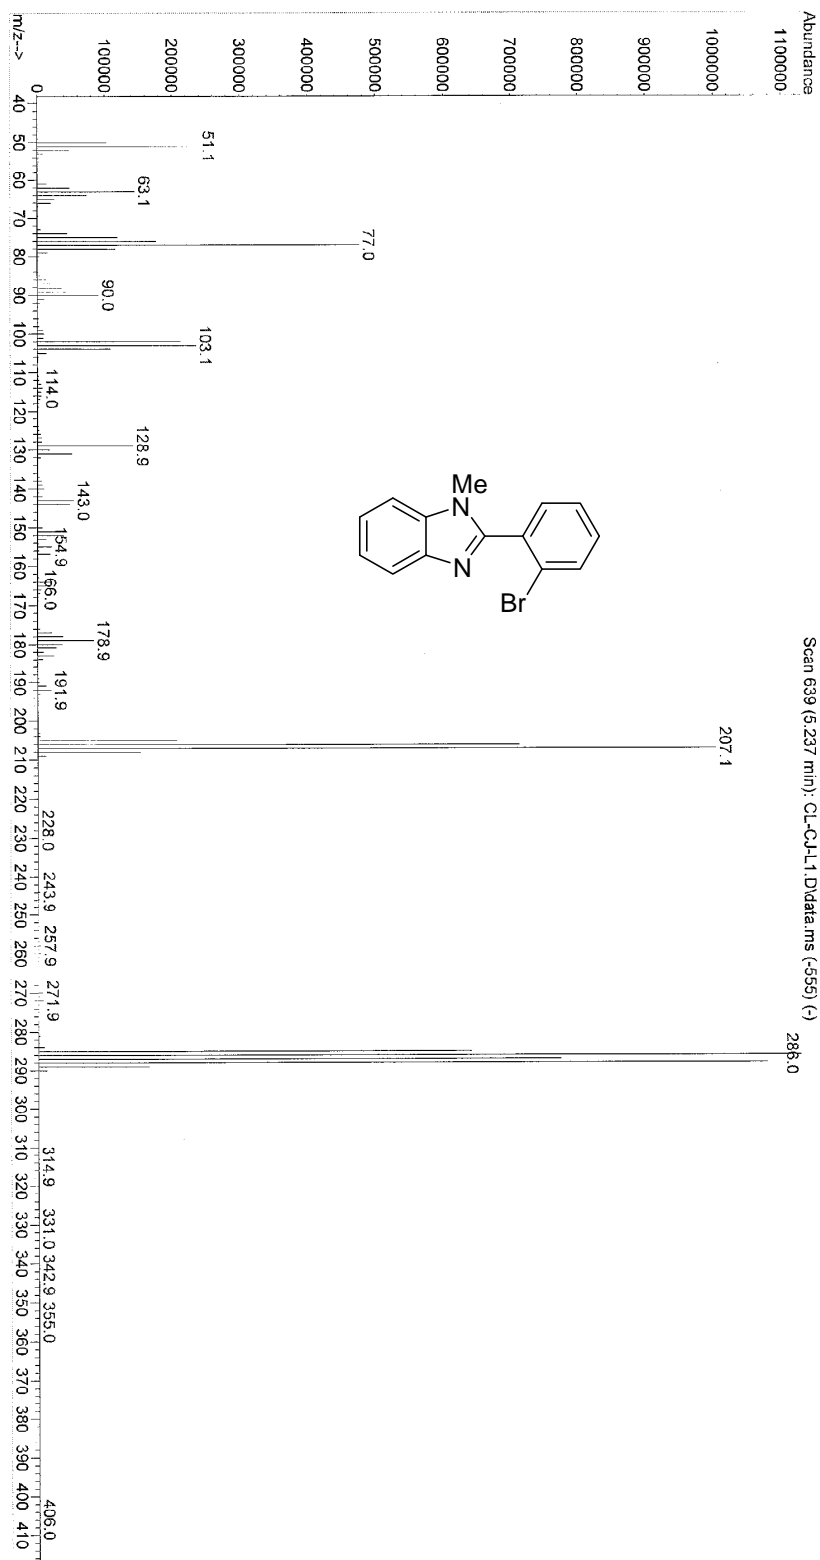

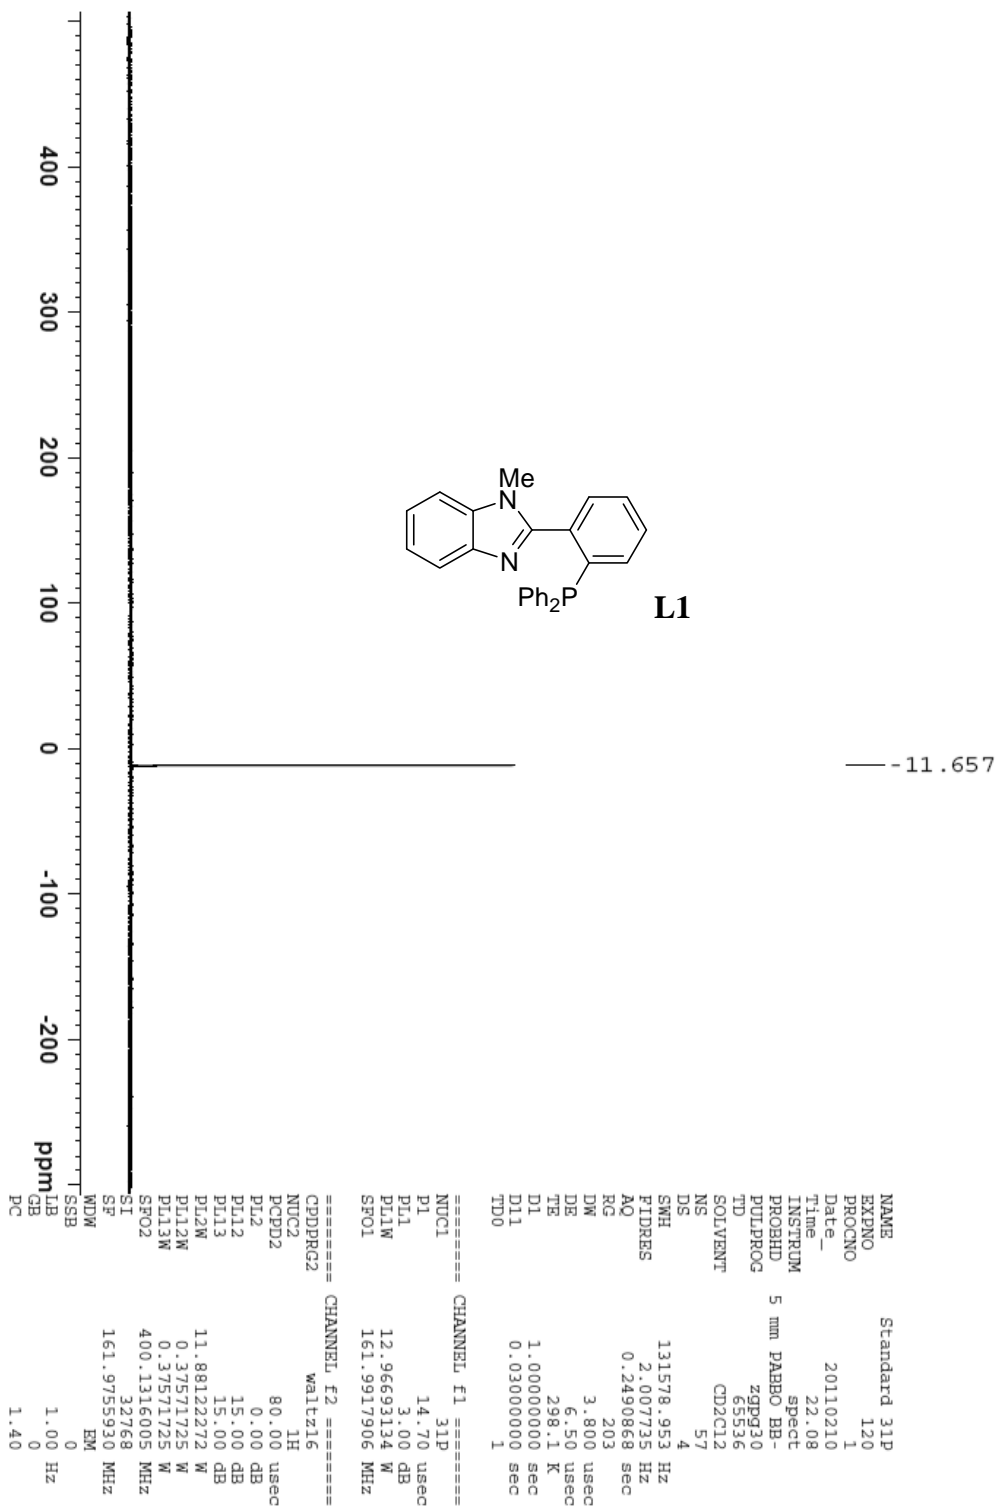

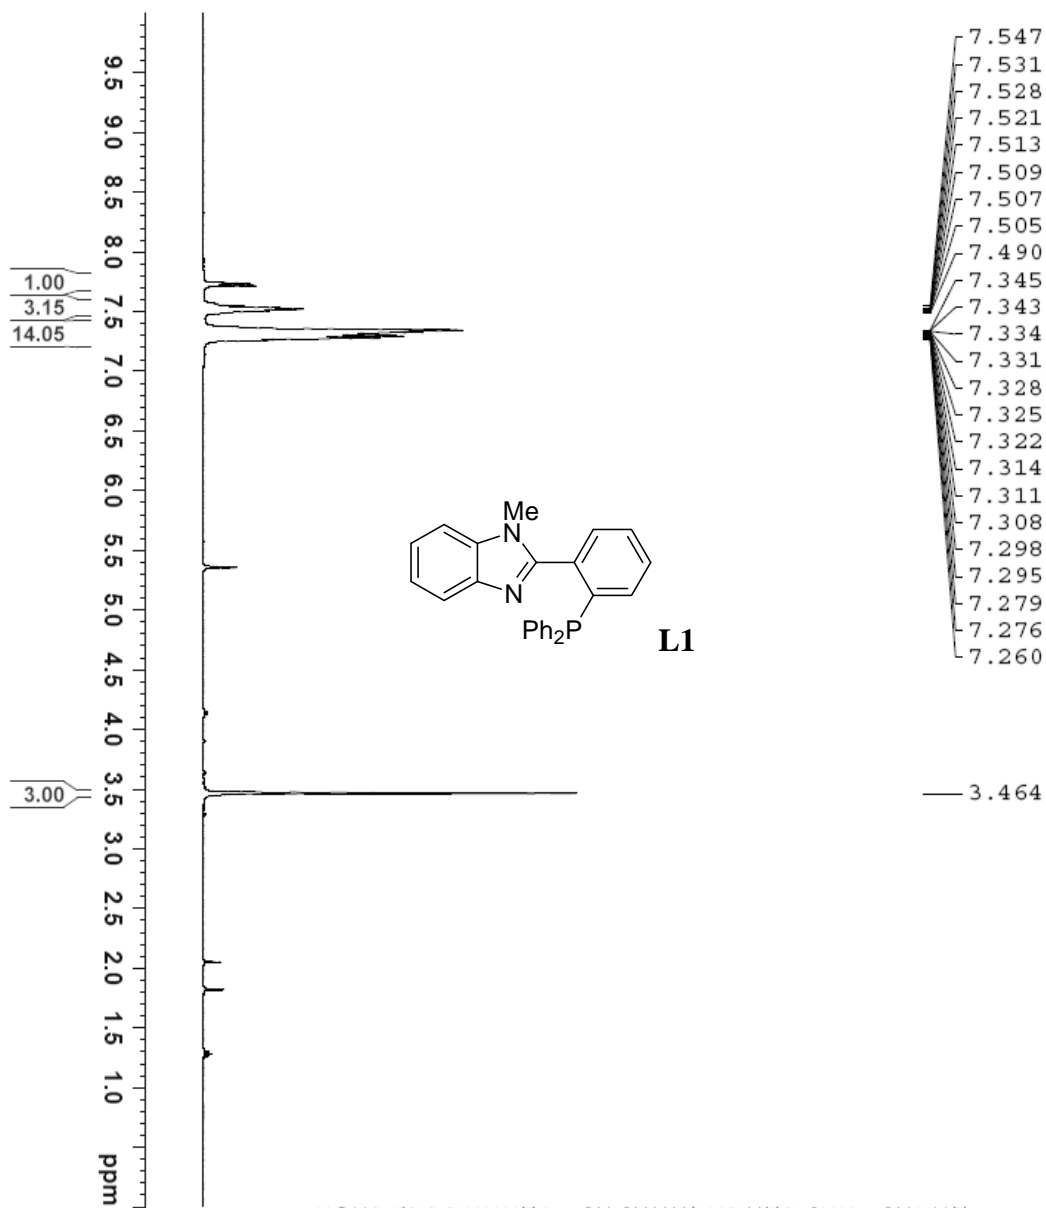

BRUKER

NAME Standard 1H  
 EXPNO 133  
 PROCNO 1  
 Date\_ 20110210  
 Time\_ 22.12  
 INSTRUM spect  
 PROBHD 5 mm PABBO BB-  
 PULPROG zg30  
 TD 32768  
 SOLVENT CD2Cl2  
 NS 12  
 DS 2  
 SWH 8012.820 Hz  
 FIDRES 0.244532 Hz  
 AQ 2.0447731 sec  
 RG 25.4  
 DW 62.400 usec  
 DE 6.50 usec  
 TE 298.4 K  
 D1 1.00000000 sec  
 TD0 1

==== CHANNEL f1 =====  
 NUCL1 1H  
 P1 14.70 usec  
 PL1 0.00 dB  
 PL1W 11.88122272 W  
 SFO1 400.1336012 MHz  
 SI 32768  
 SF 400.1300000 MHz  
 WDW EM  
 SSB 0  
 LB 0.30 Hz  
 GB 0  
 PC 1.00

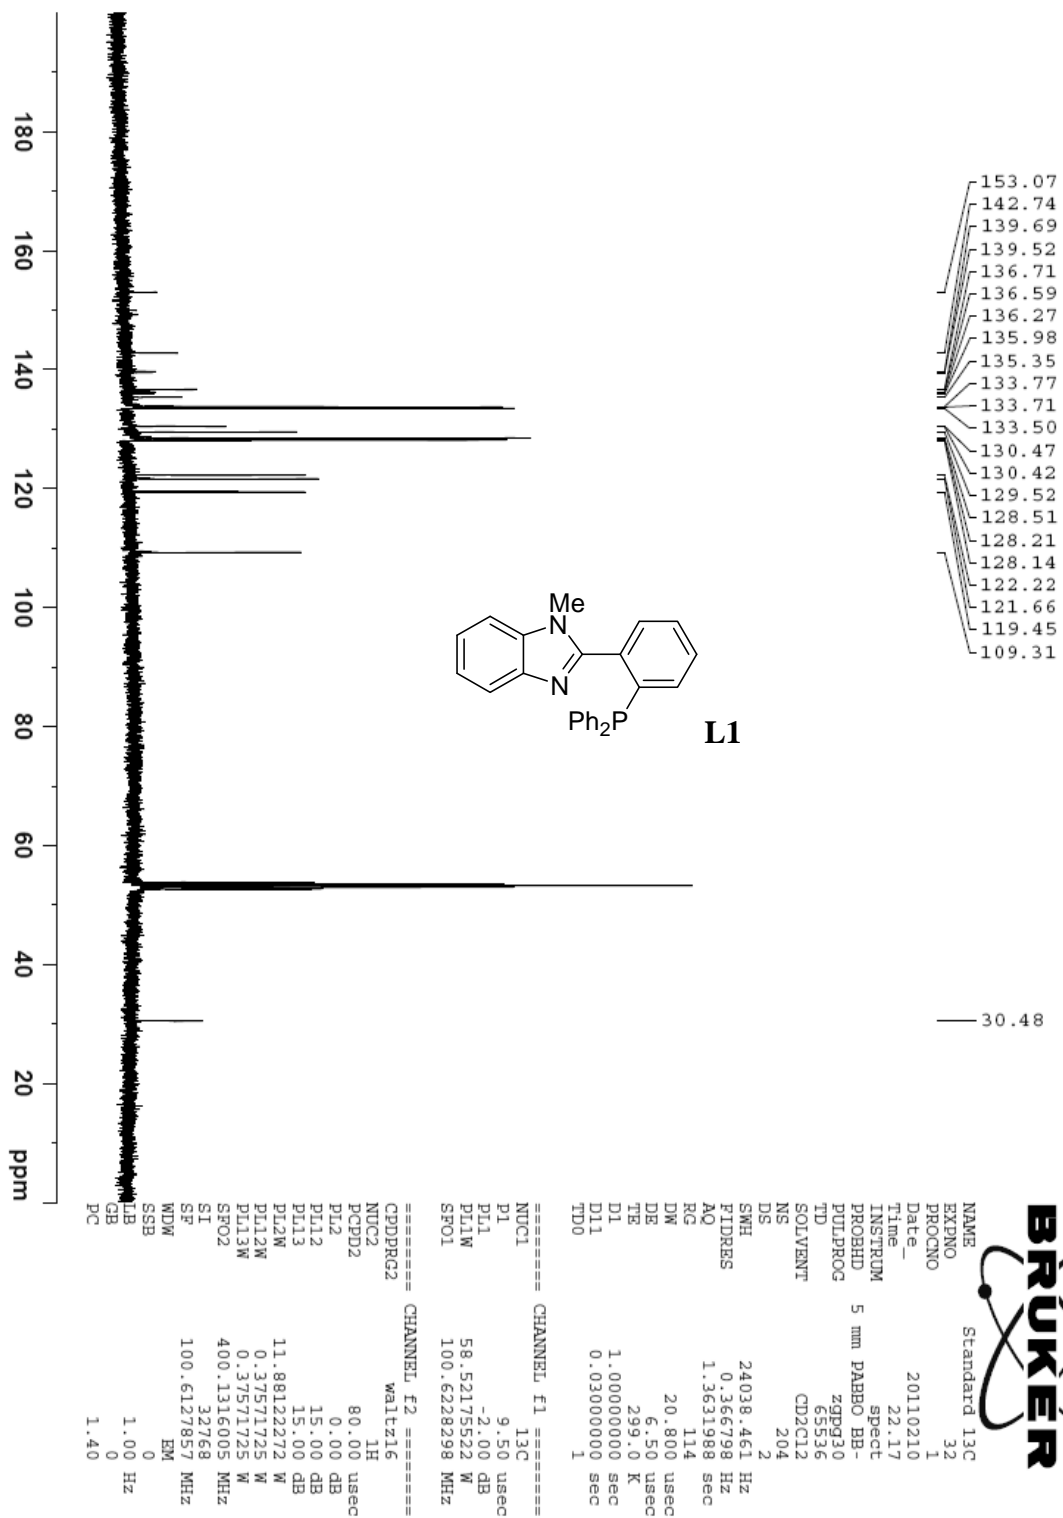

File : C:\msdchem\1\DATA\DIc\NNPPh.D  
Operator : Seam  
Acquired : 10 Feb 2011 16:27 using AcqMethod METHOD2P.M  
Instrument : 5973N  
Sample Name :  
Misc Info :  
Vial Number: 2

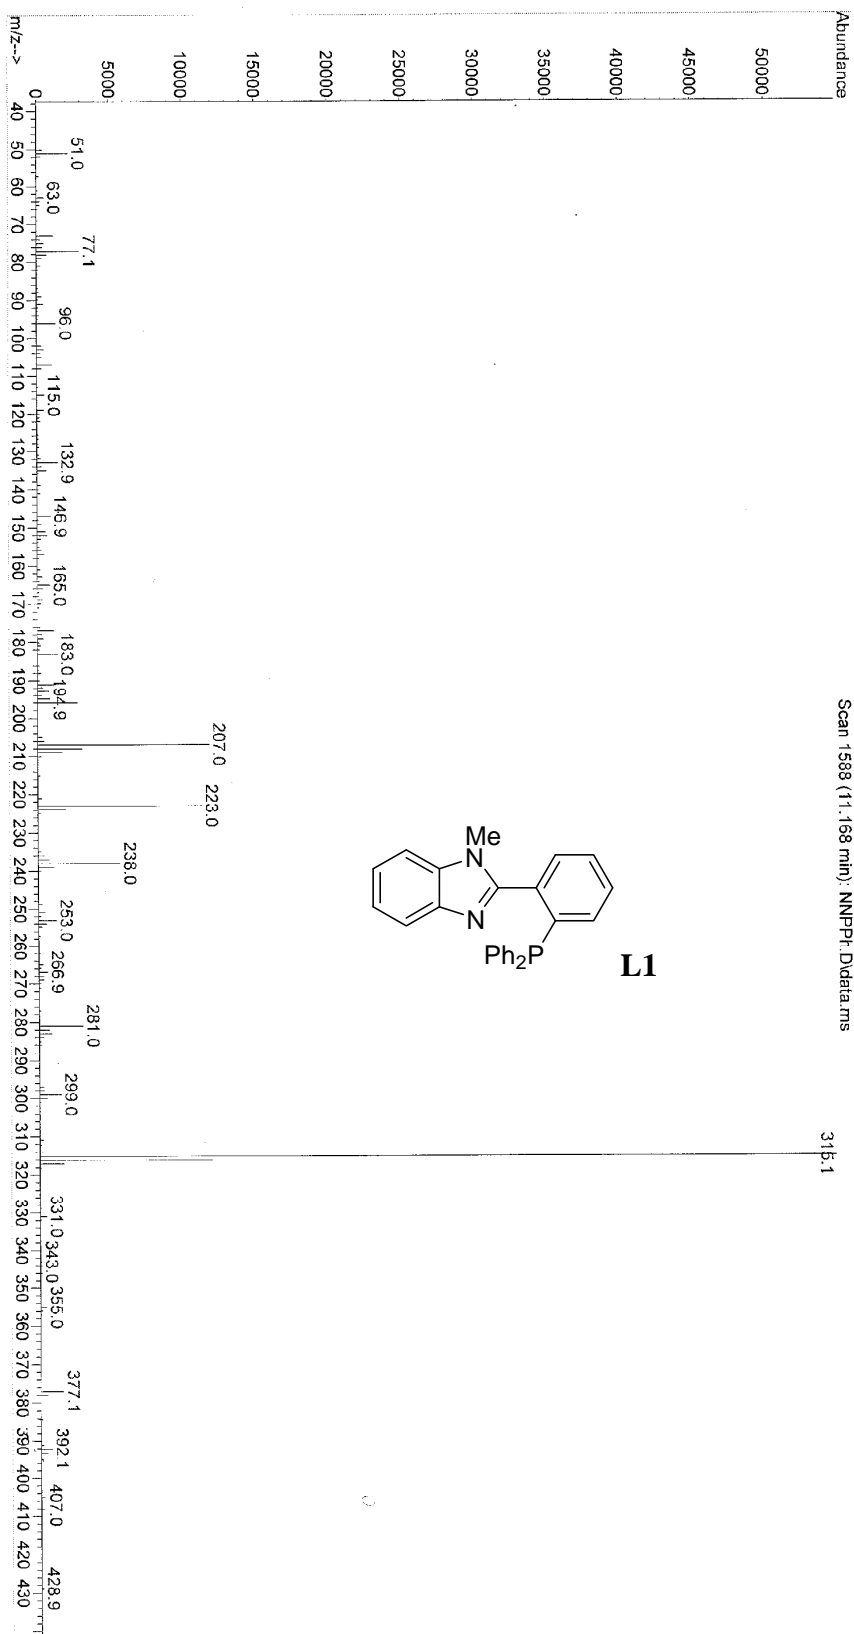



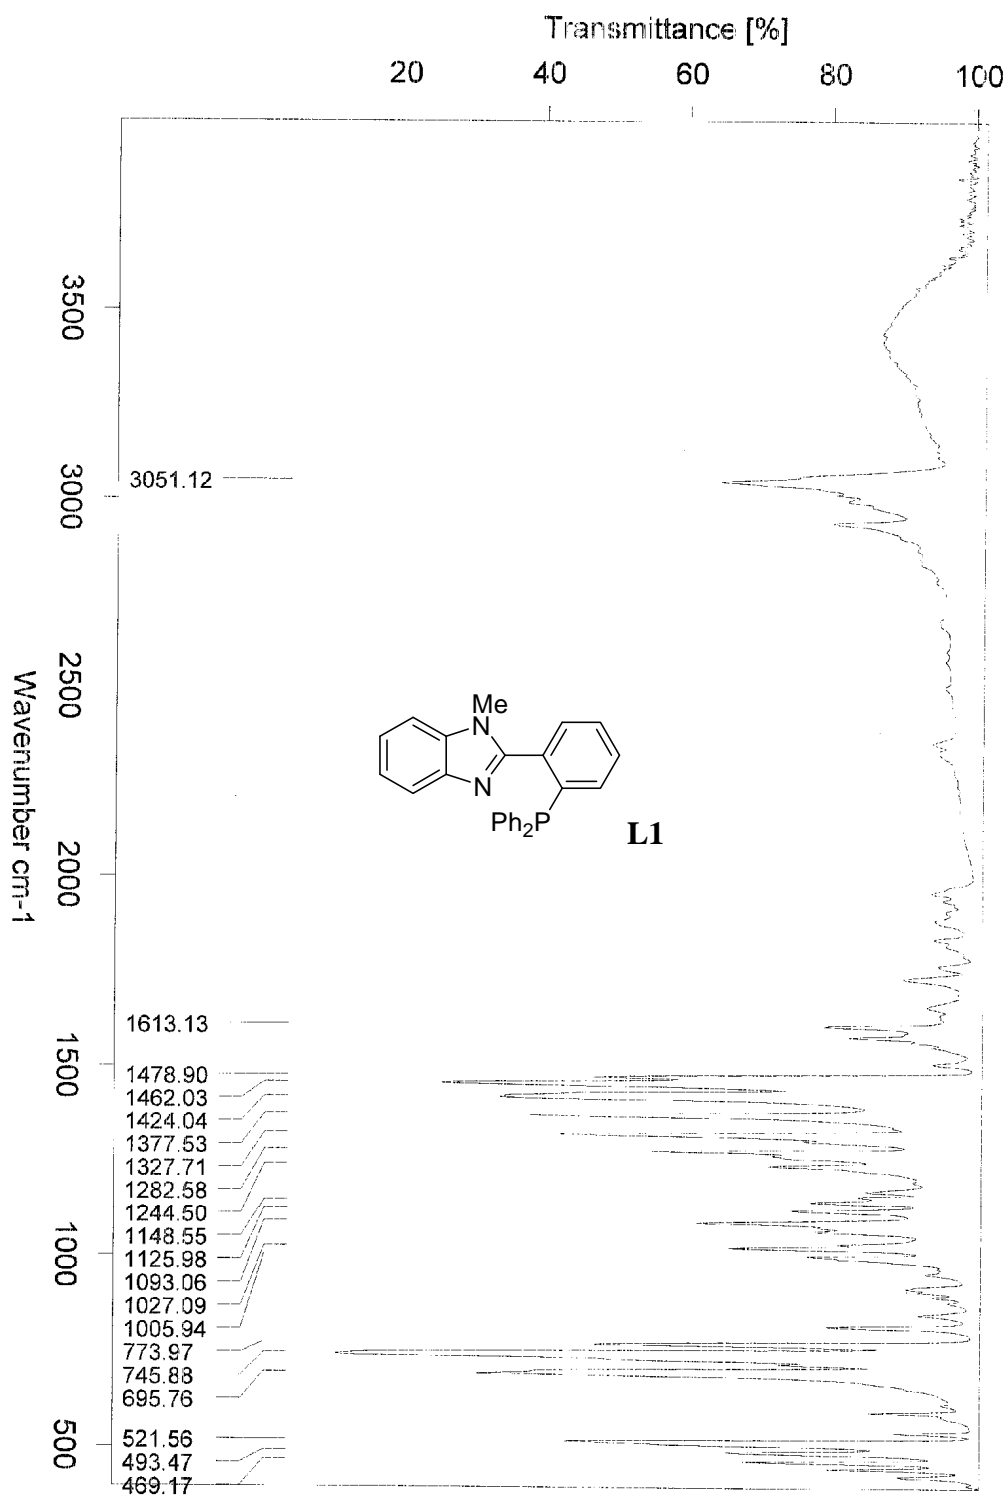

Experimental Composition Report

Page 1

Single Mass Analysis

Tolerance = 5.0 PPM / DBE: min = -1.5, max = 50.0  
Element prediction: Off

Monoisotopic Mass, Even Electron Ions

13 formula(e) evaluated with 1 results within limits (up to 50 closest results for each mass)

Elements Used:

C: 0-26 H: 0-26 N: 0-3 Na: 0-1 P: 0-1

Kin-Dept-16022011-HS S10 51 (0.967) Cn (Cen,4, 80.00, Ar); Sm (SG, 2x3.00); Sb (5,40.00); Cm (40:58)

TOF MS ES+

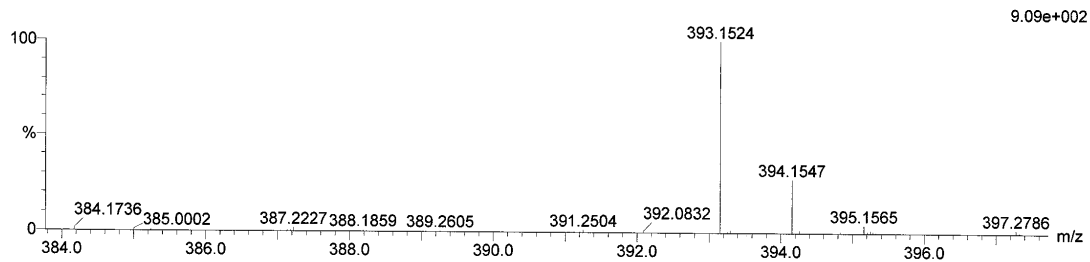

Minimum:

Maximum: 5.0 5.0 -1.5

Mass Calc. Mass mDa PPM DBE i-FIT Formula

| Mass     | Calc. Mass | mDa | PPM | DBE  | i-FIT | Formula      |
|----------|------------|-----|-----|------|-------|--------------|
| 393.1524 | 393.1521   | 0.3 | 0.8 | 17.5 | 1.0   | C26 H22 N2 P |

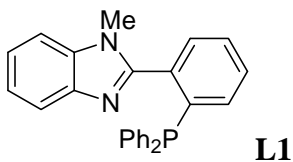

**L1**

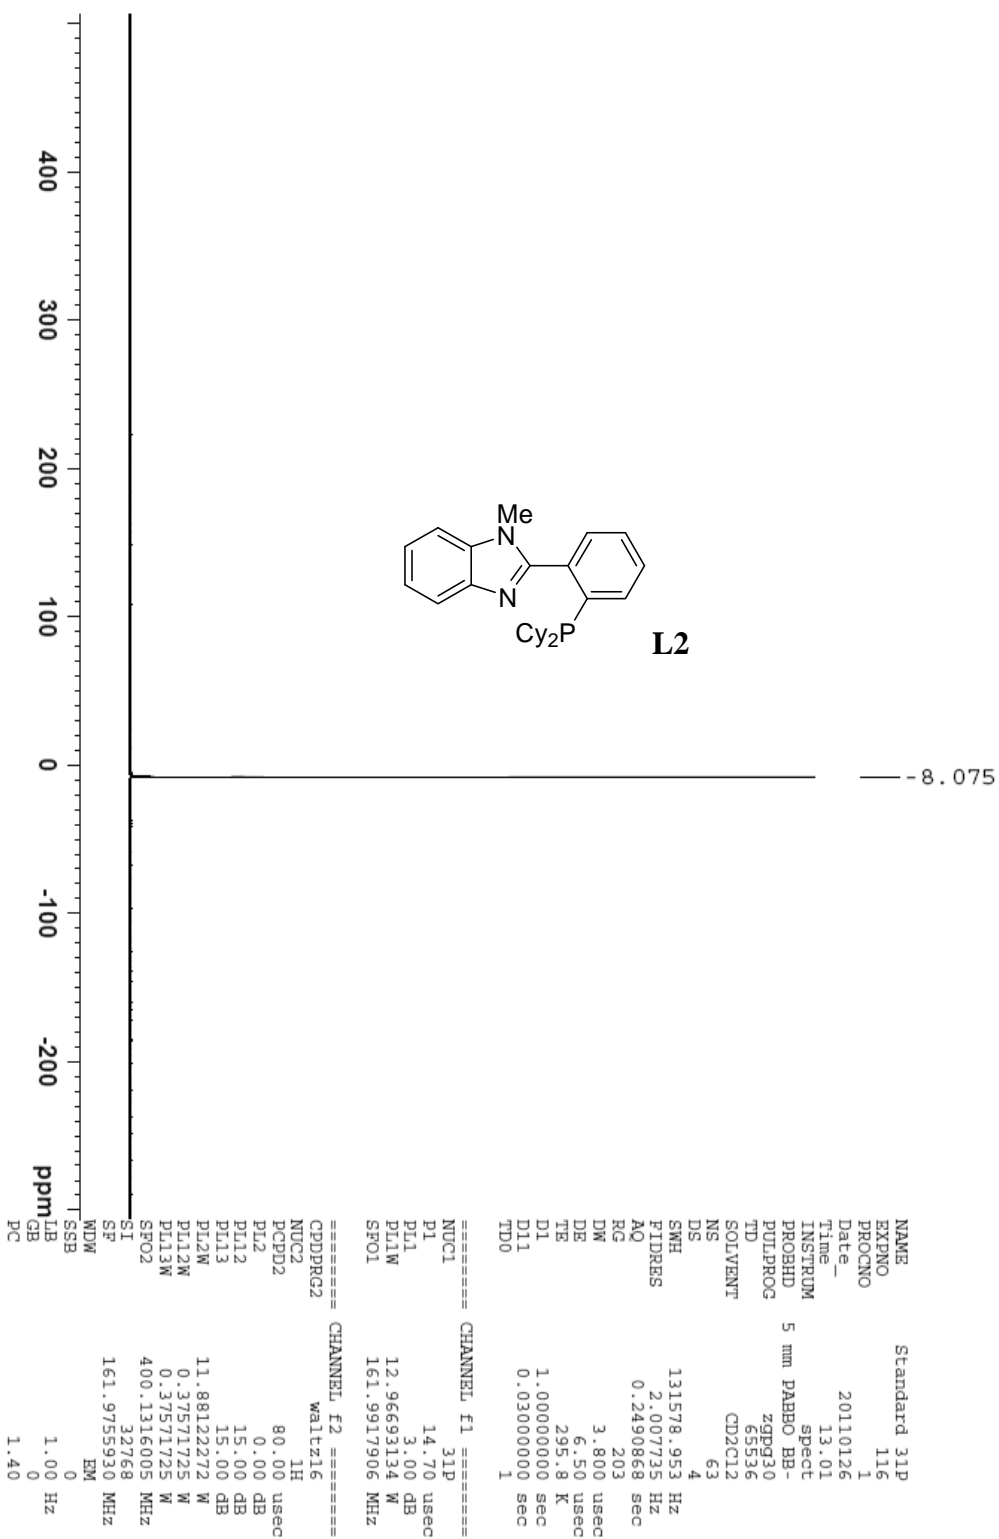

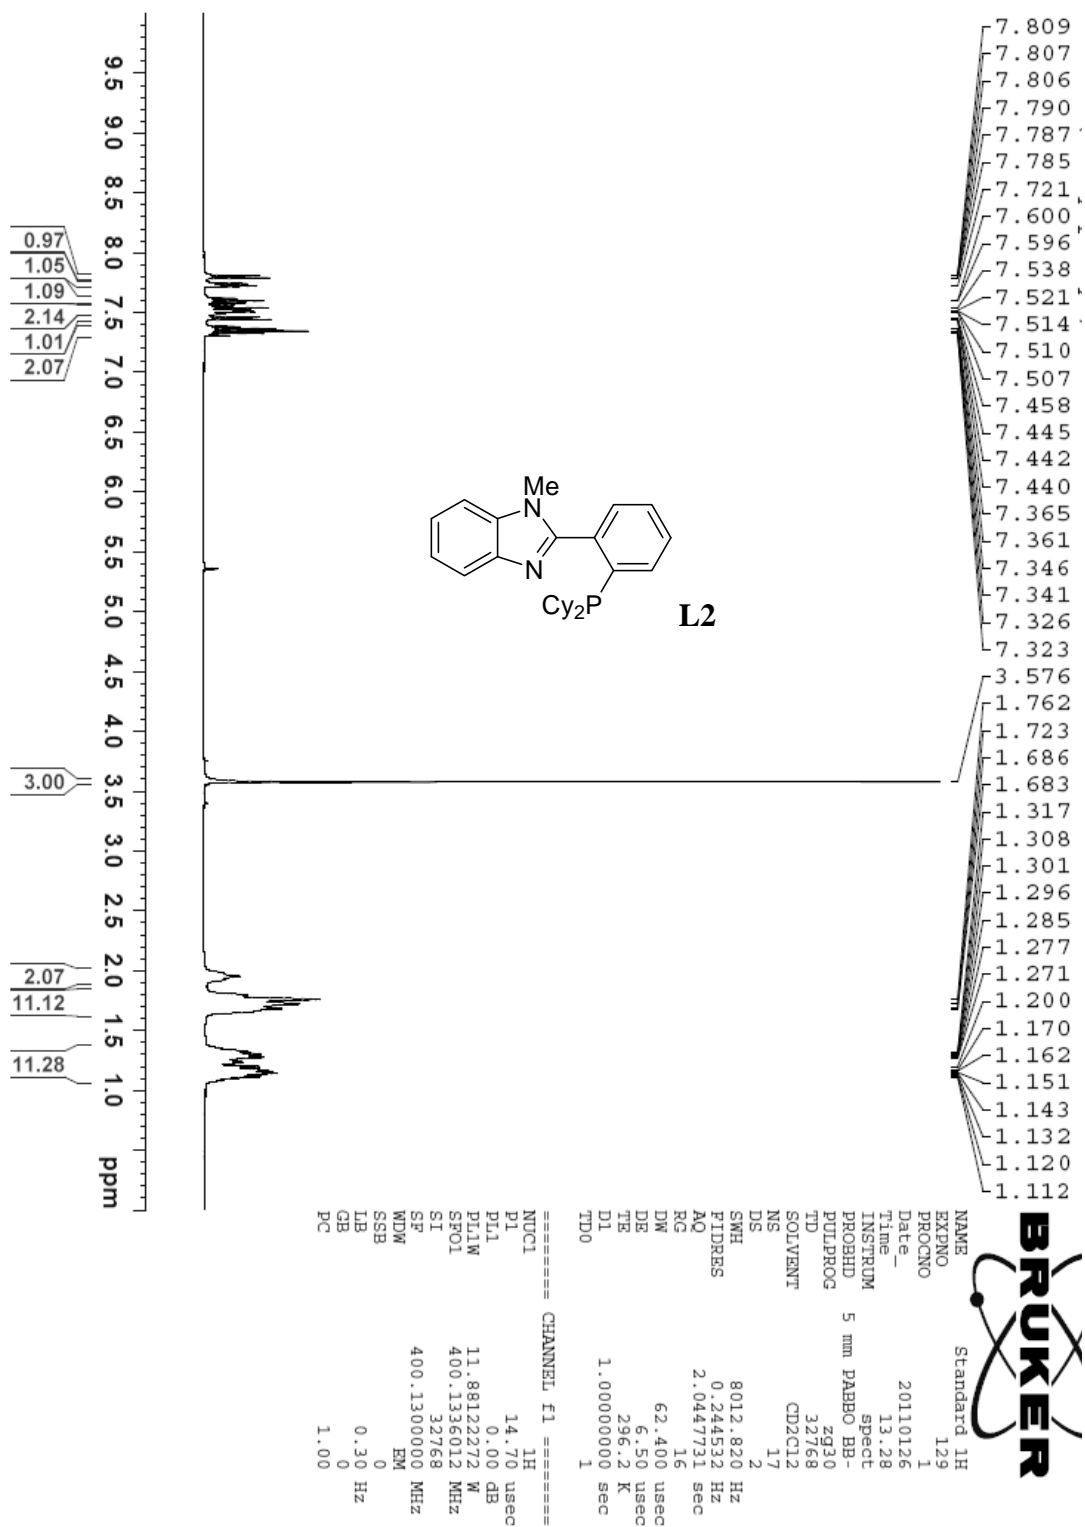

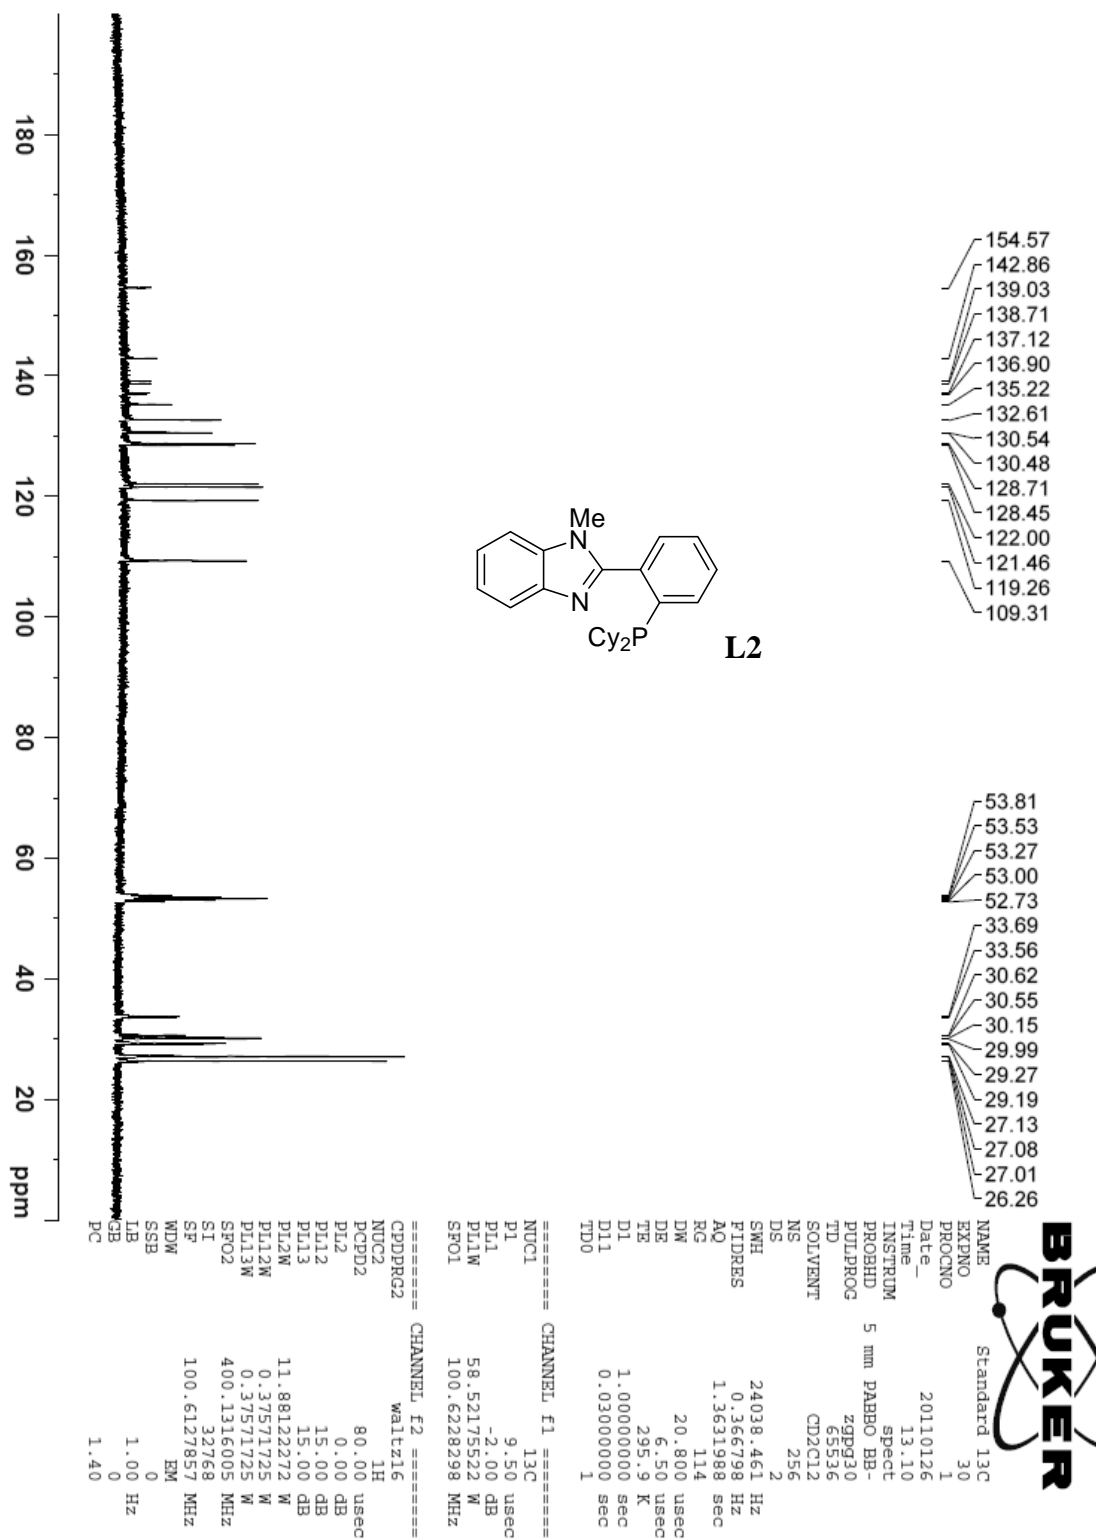

File : C:\msdchem\1\DATA\DI\NMPcy.D  
Operator : Seam  
Acquired : 10 Feb 2011 16:48 using AcqMethod METHOD2F.M  
Instrument : 5973N  
Sample Name :  
Misc Info :  
Vial Number: 3

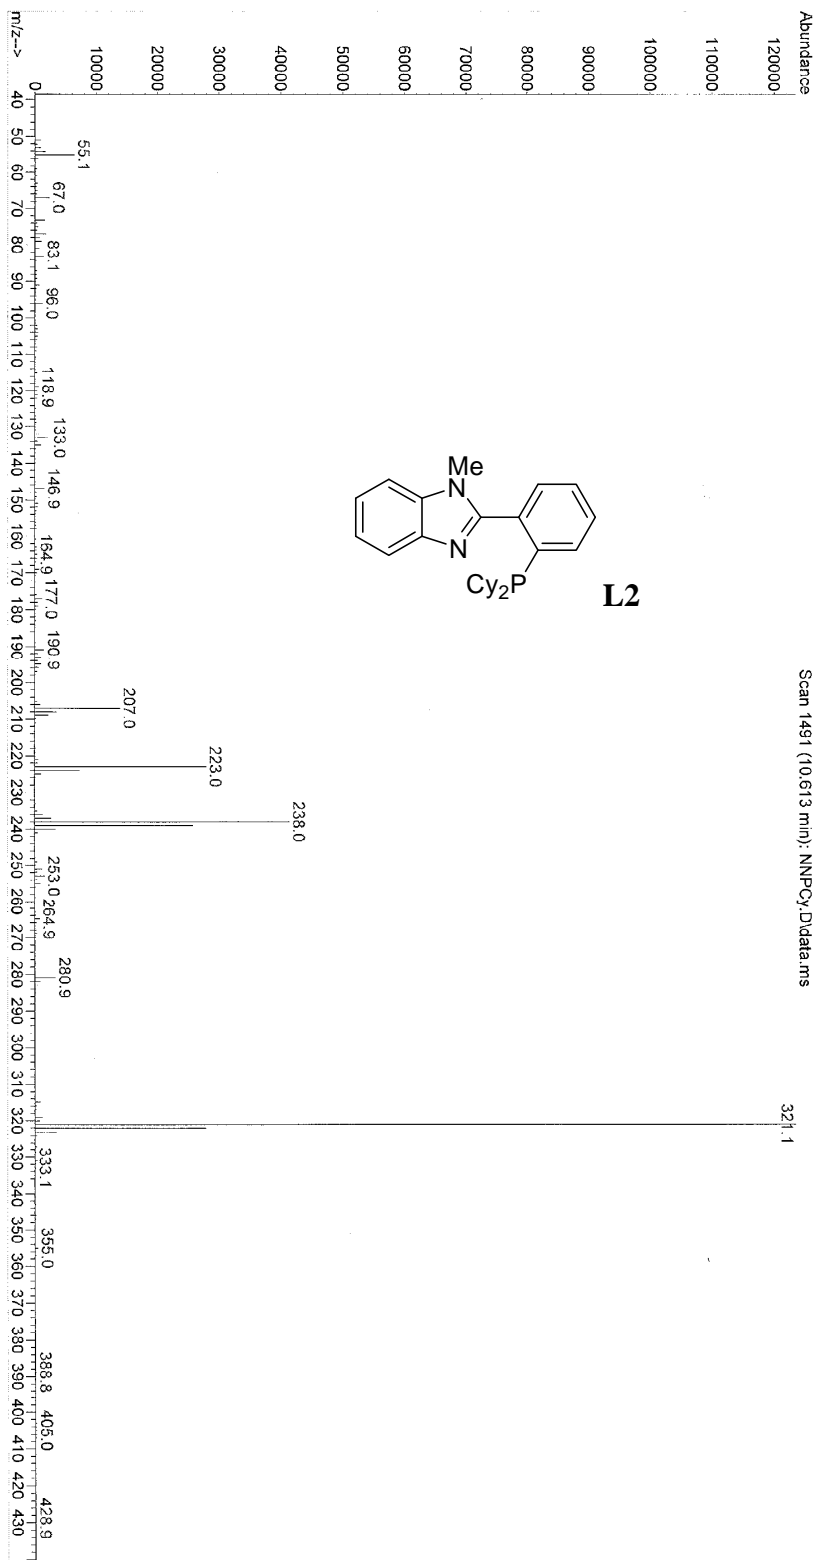

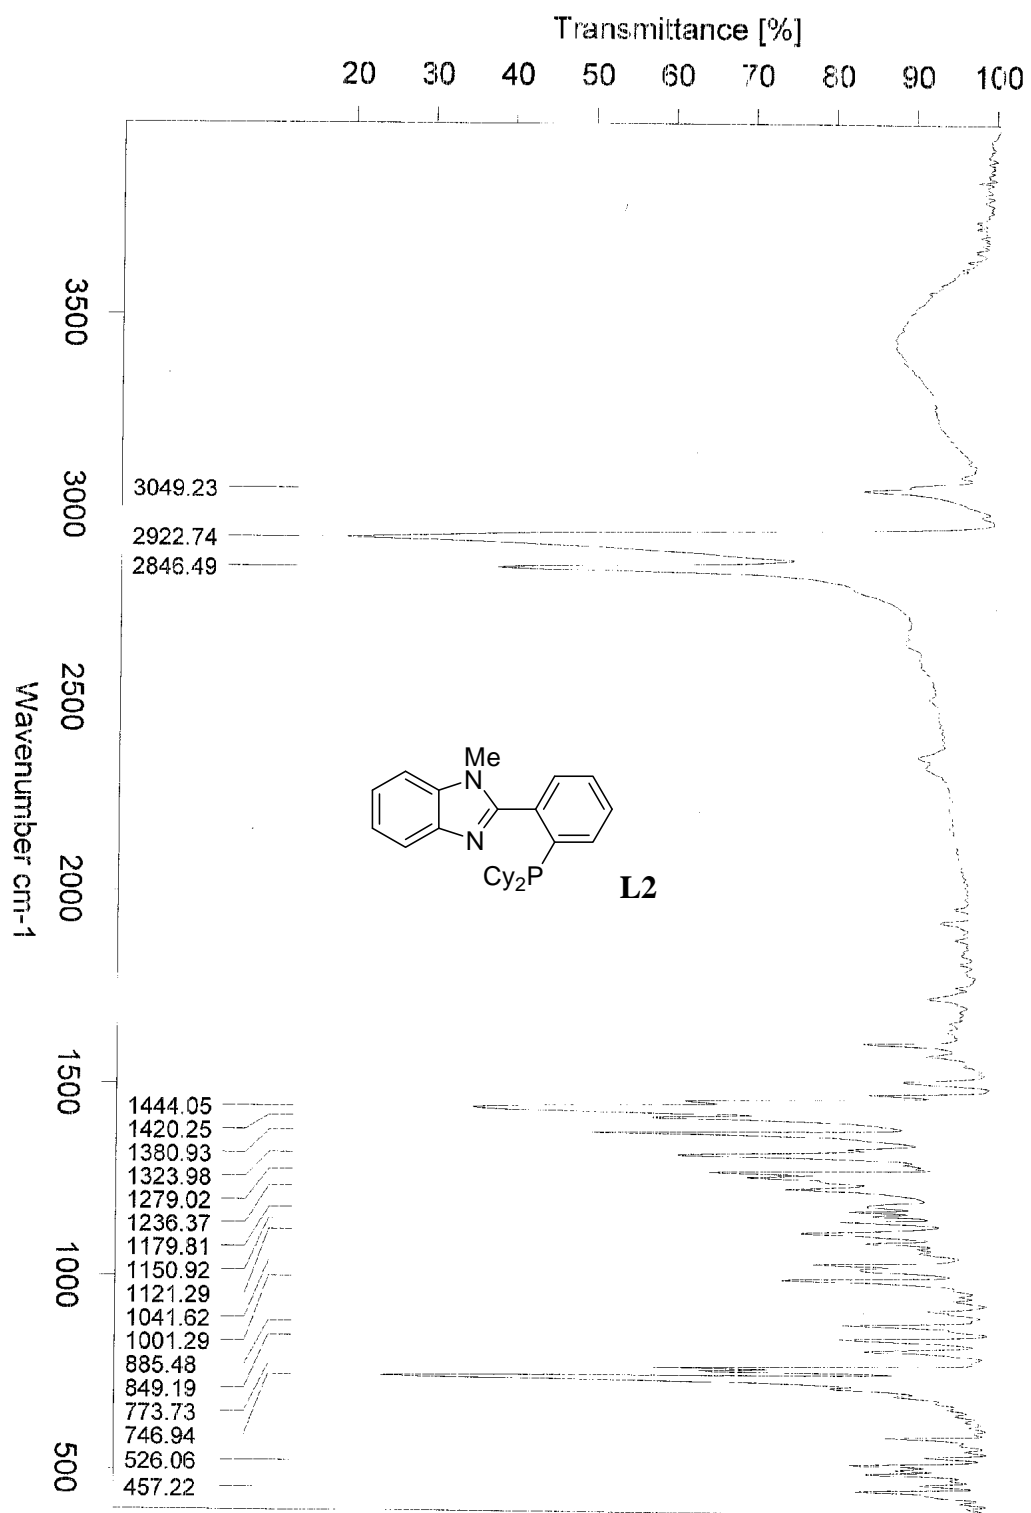

Elemental Composition Report

Page 1

Single Mass Analysis

Tolerance = 20.0 PPM / DBE: min = -100.0, max = 1000.0  
Selected filters: None

Monoisotopic Mass, Even Electron Ions

45 formula(e) evaluated with 1 results within limits (up to 50 best isotopic matches for each mass)

Elements Used:

C: 0-26 H: 0-34 N: 0-4 Na: 0-1 P: 0-2

Kin-Dept-07022011-HS S1 48 (0.898) AM (Top,5, Ht,10000.0,0.00,1.00); Sm (Md, 3.00); Cm (41:55)

TOF MS ES+

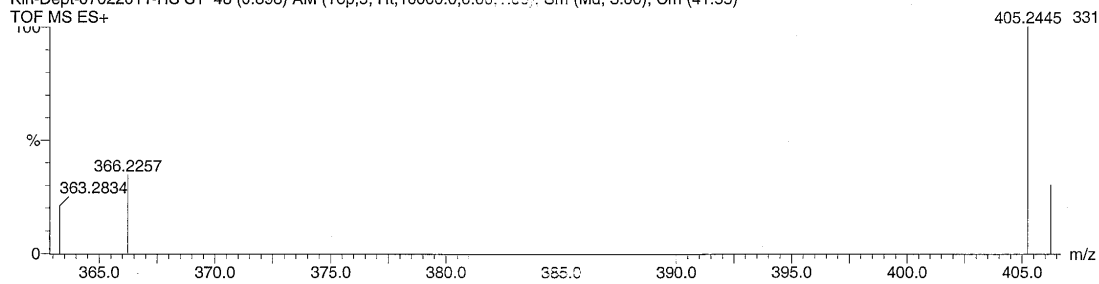

Minimum: -100.0  
Maximum: 5.0 20.0 1000.0

| Mass     | Calc. Mass | mDa  | PPM  | DBE  | i-fit     | Formula      |
|----------|------------|------|------|------|-----------|--------------|
| 405.2445 | 405.2460   | -1.5 | -3.7 | 11.5 | 2773074.0 | C26 H34 N2 P |

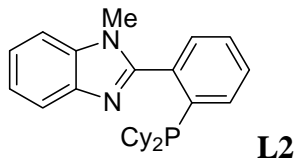



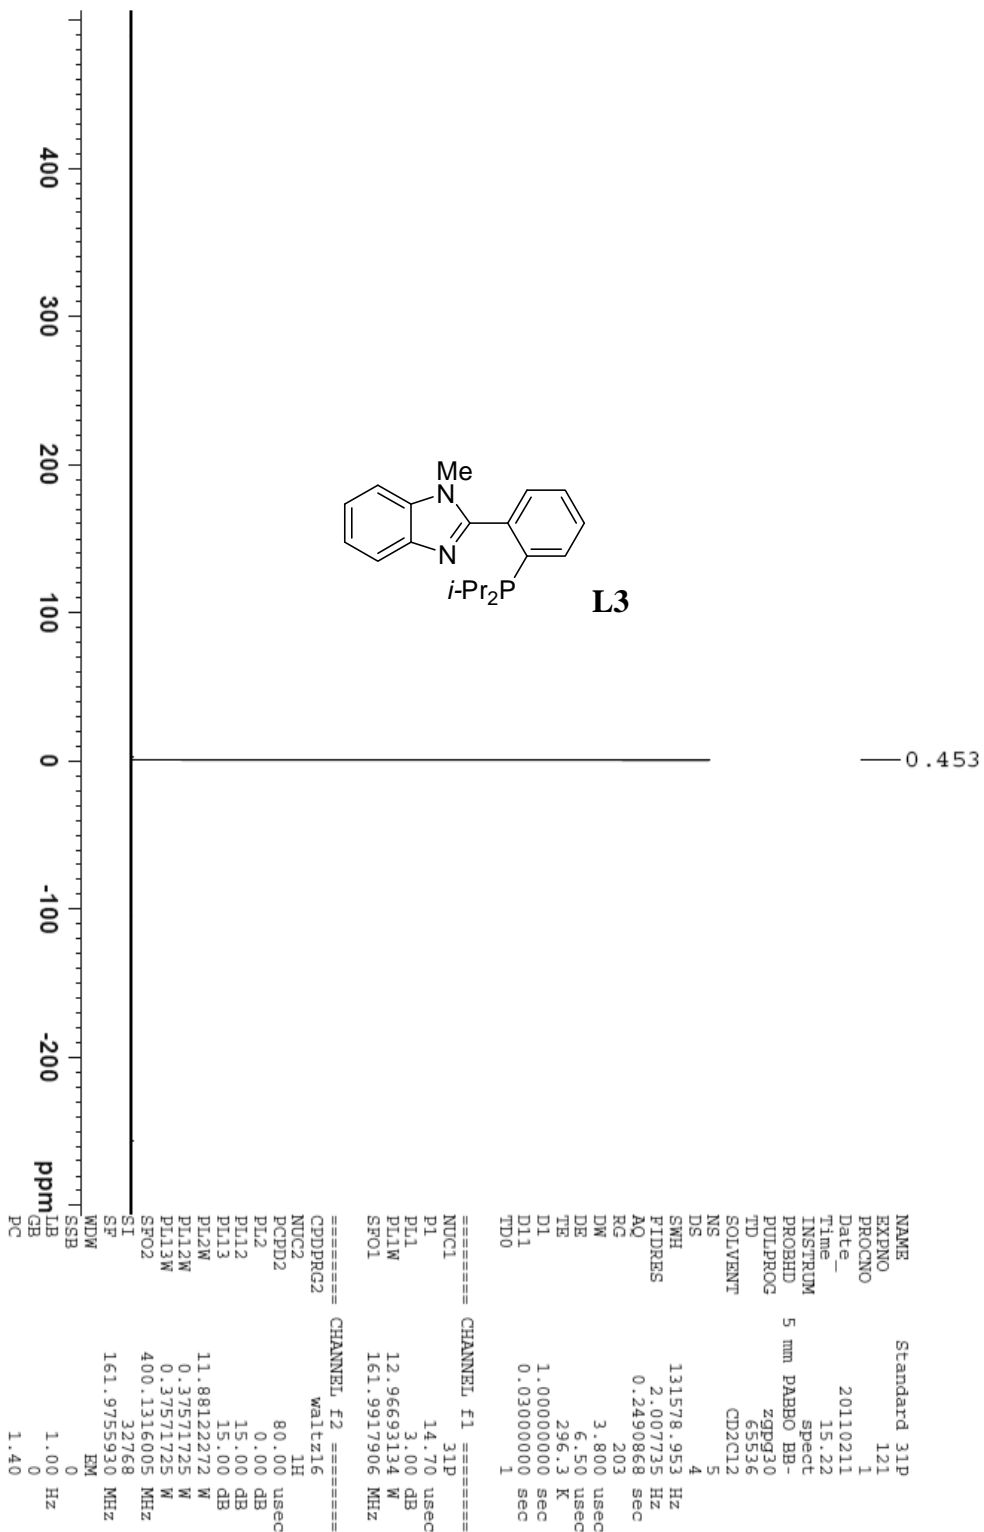

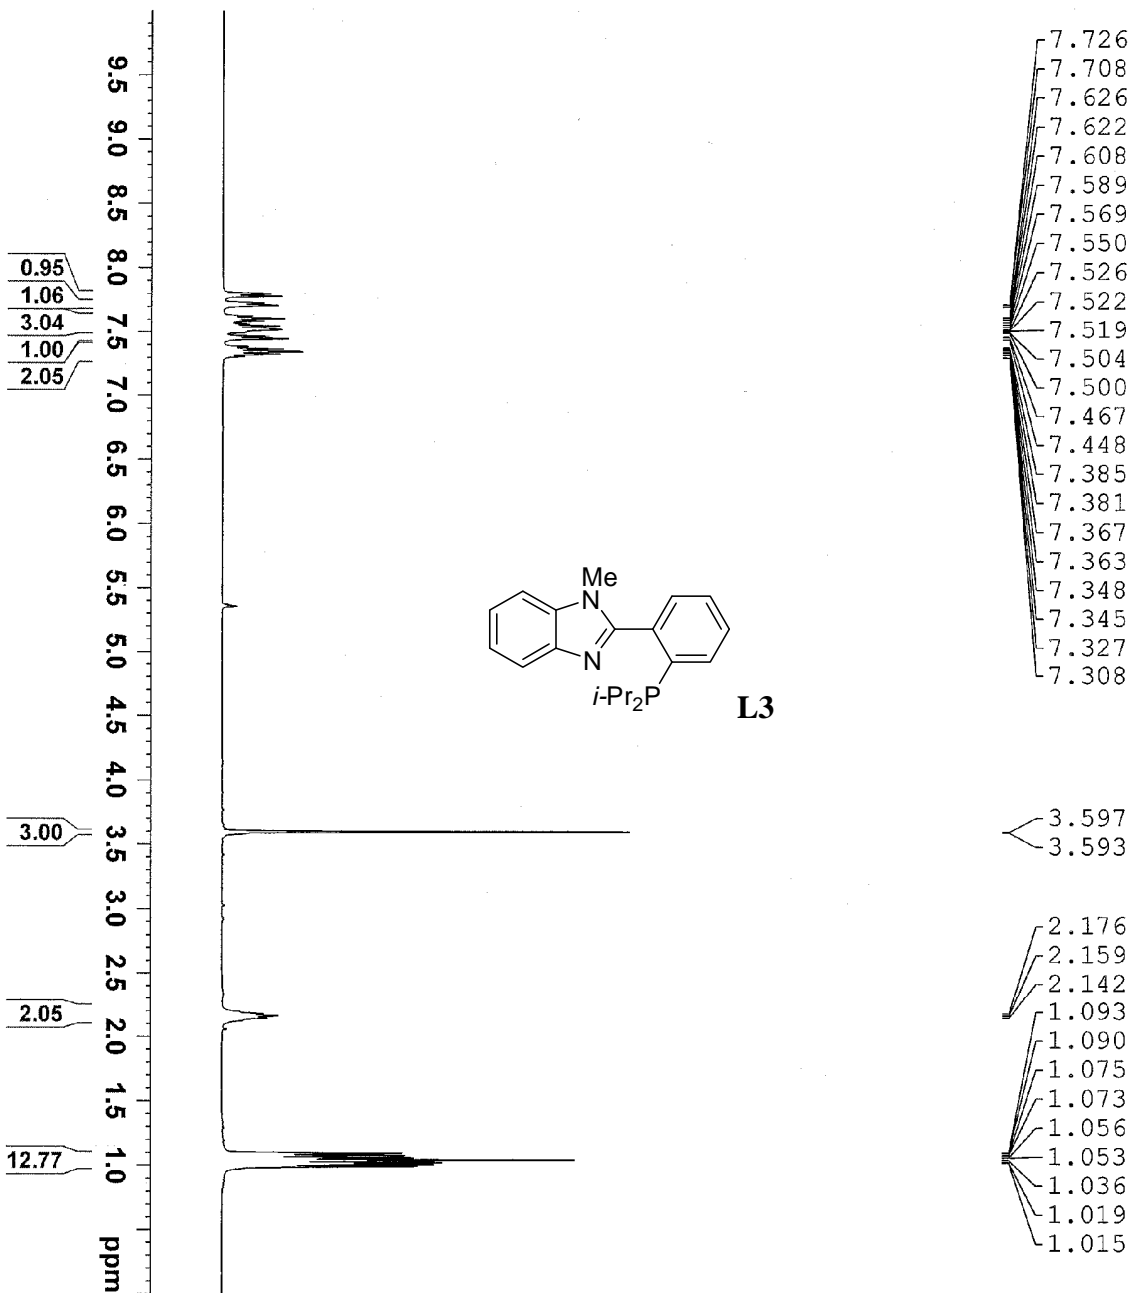

BRUKER

Standard 1H  
 134

NAME Standard 1H  
 EXPNO 1  
 PROCNO 1  
 Date\_ 20110211  
 Time 15.24  
 INSTRUM spect  
 PROBHD 5 mm PABBO BB-  
 PULPROG zg30  
 TD 32768  
 SOLVENT CD2Cl2  
 NS 16  
 DS 2  
 SWH 8012.820 Hz  
 FIDRES 0.244532 Hz  
 AQ 2.0447731 sec  
 RG 14.2  
 DW 62.400 usec  
 DE 6.50 usec  
 TE 296.4 K  
 D1 1.00000000 sec  
 TD0 1

==== CHANNEL f1 =====  
 NUC1 1H  
 P1 14.70 usec  
 PL1 0.00 dB  
 PL1W 11.88122272 W  
 SF01 400.1336012 MHz  
 SI 32768  
 SF 400.1300000 MHz  
 WDW EM  
 SSB 0  
 LB 0.00 Hz  
 GB 0  
 PC 1.00

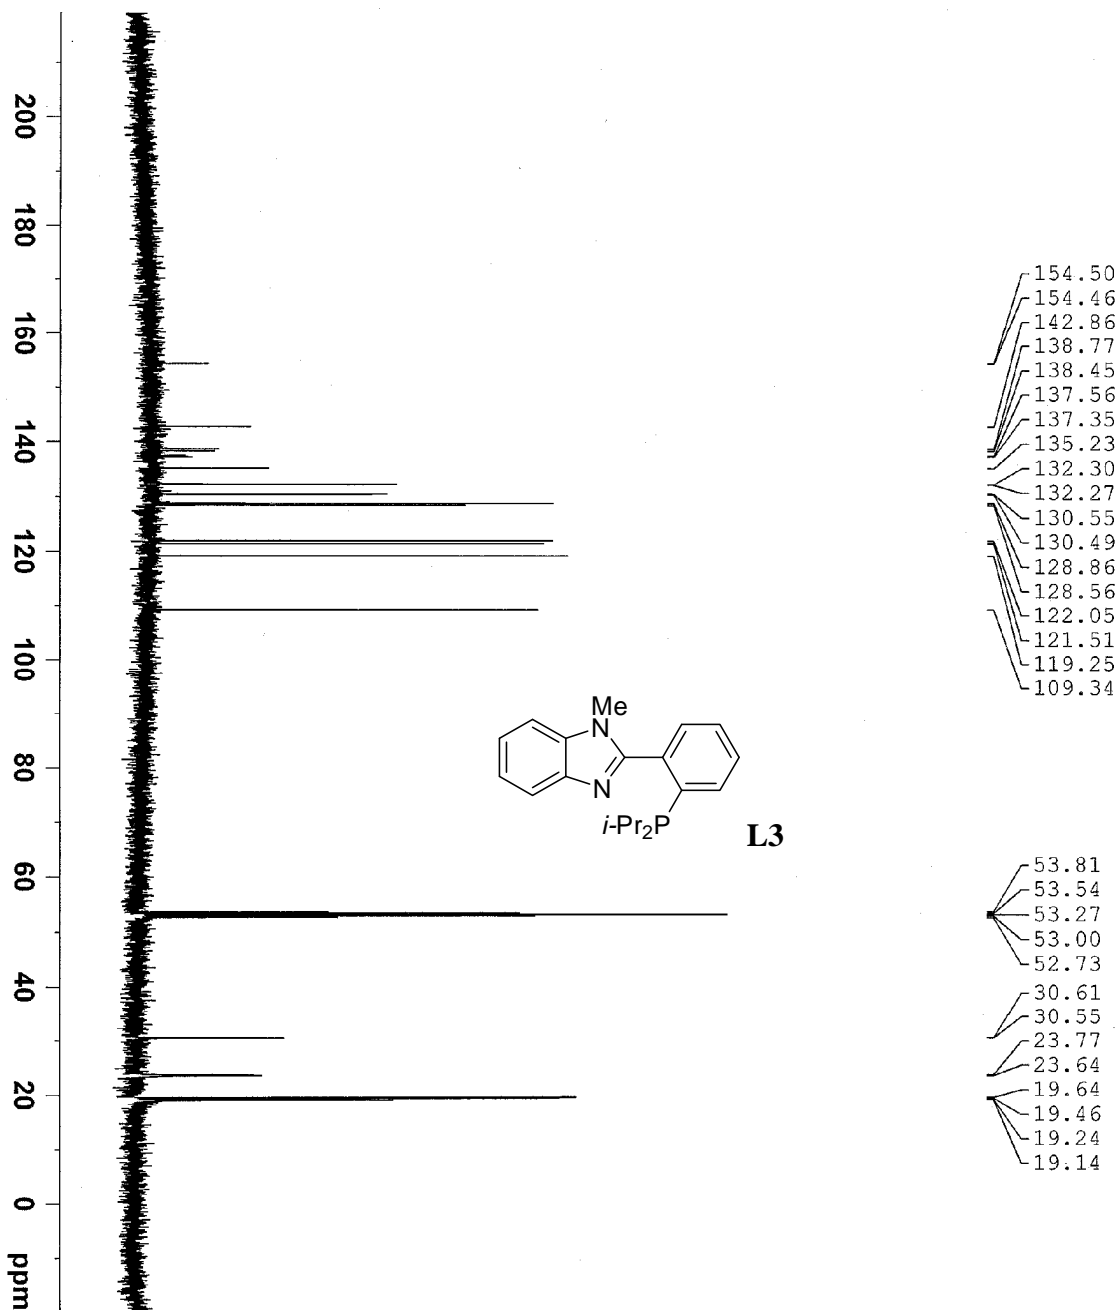

154.50  
 154.46  
 142.86  
 138.77  
 138.45  
 137.56  
 137.35  
 135.23  
 132.30  
 132.27  
 130.55  
 130.49  
 128.86  
 128.56  
 122.05  
 121.51  
 119.25  
 109.34

53.81  
 53.54  
 53.27  
 53.00  
 52.73  
 30.61  
 30.55  
 23.77  
 23.64  
 19.64  
 19.46  
 19.24  
 19.14

**BRUKER**

Standard 13C

|         |                |
|---------|----------------|
| NAME    | Standard 13C   |
| EXPNO   | 33             |
| PROCNO  | 1              |
| Date_   | 20110211       |
| Time    | 15.27          |
| INSTRUM | spect          |
| PROBHD  | 5 mm PABBO BB- |
| PULPROG | zgpg30         |
| TD      | 65536          |
| SOLVENT | CD2Cl2         |
| NS      | 70             |
| DS      | 2              |
| SWH     | 24038.461 Hz   |
| FIDRES  | 0.366798 Hz    |
| AQ      | 1.3631988 sec  |
| RG      | 114            |
| DW      | 20.800 usec    |
| DE      | 6.50 usec      |
| TE      | 296.3 K        |
| DL      | 1.00000000 sec |
| D11     | 0.03000000 sec |
| TD0     | 1              |

  

|                       |                 |
|-----------------------|-----------------|
| ==== CHANNEL f1 ===== |                 |
| NUC1                  | 13C             |
| PL                    | 9.50 usec       |
| PL1                   | -2.00 dB        |
| PL1W                  | 58.52175522 W   |
| SFO1                  | 100.6228298 MHz |

  

|                       |                 |
|-----------------------|-----------------|
| ==== CHANNEL f2 ===== |                 |
| CPDPRG2               | waltz16         |
| NUC2                  | 1H              |
| PCPD2                 | 80.00 usec      |
| PL2                   | 0.00 dB         |
| PL12                  | 15.00 dB        |
| PL13                  | 15.00 dB        |
| PL2W                  | 11.88122272 W   |
| PL12W                 | 0.37571725 W    |
| PL13W                 | 0.37571725 W    |
| SFO2                  | 400.1316005 MHz |
| SI                    | 32768           |
| SF                    | 100.6127857 MHz |
| WDW                   | EM              |
| SSB                   | 0               |
| LB                    | 1.00 Hz         |
| GB                    | 0               |
| PC                    | 1.40            |

File : C:\MSDCHEM\1\DATA\CMSO\Snapshot\NNPIPR-2.D  
Operator : Seam  
Acquired : 10 Feb 2011 17:31 using AcqMethod METHOD2.M  
Instrument : 5973N  
Sample Name:  
Misc Info :  
Vial Number: 4

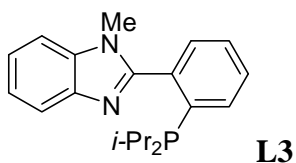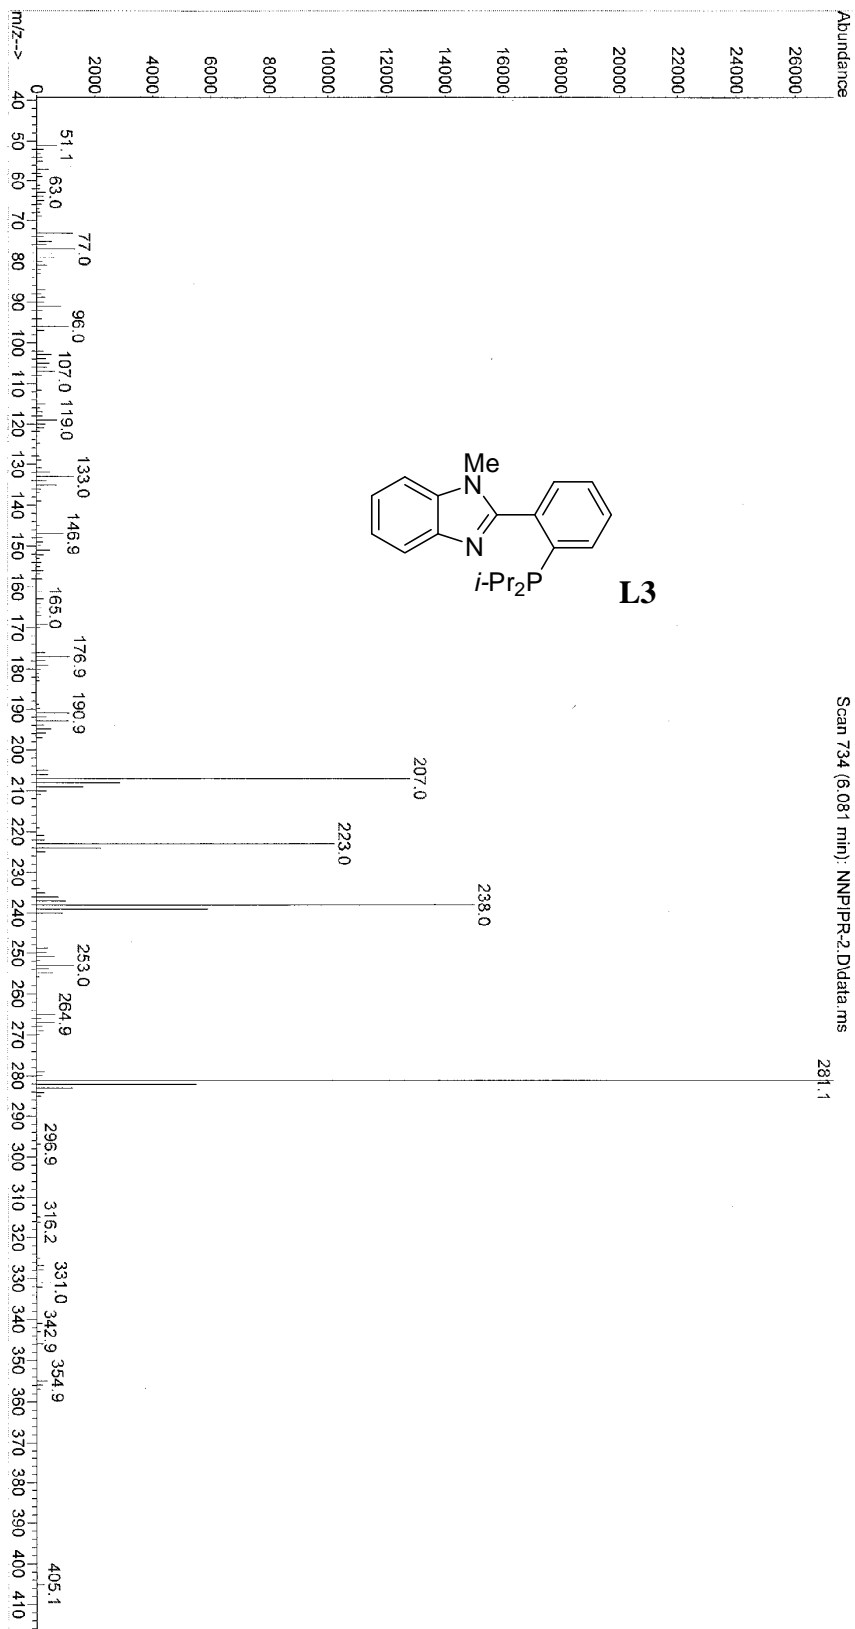

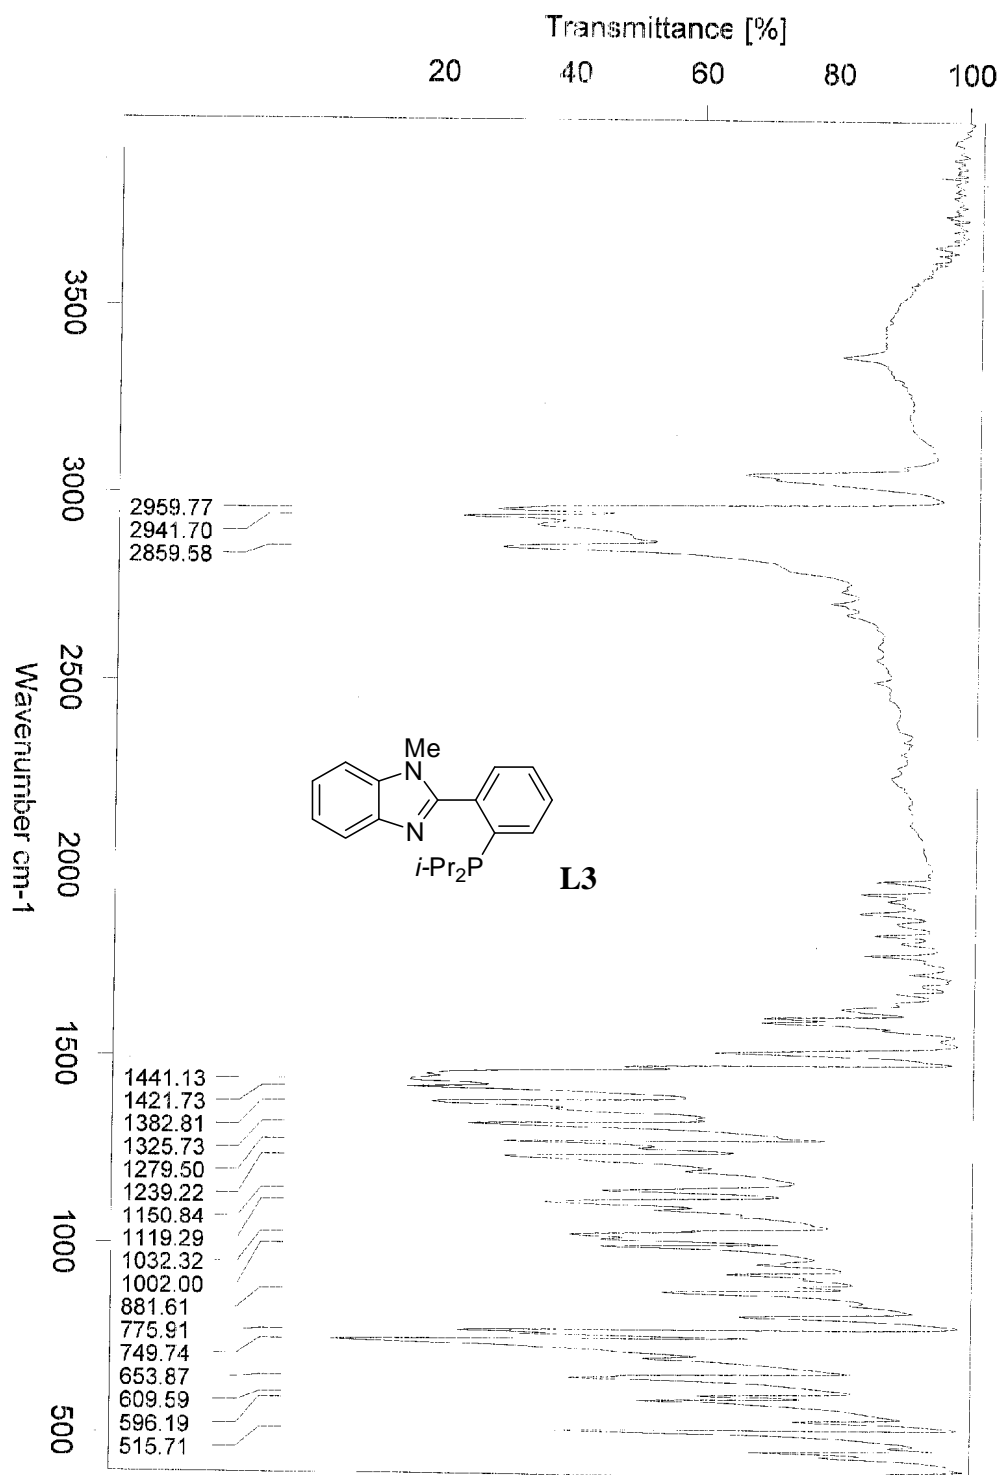

### Elemental Composition Report

Page 1

#### Single Mass Analysis

Tolerance = 5.0 PPM / DBE: min = -1.5, max = 50.0

Element prediction: Off

Monoisotopic Mass, Even Electron Ions

38 formula(e) evaluated with 1 results within limits (up to 50 closest results for each mass)

Elements Used:

C: 0-26 H: 0-26 N: 0-3 Na: 0-1 P: 0-1

Kin-Dept-16022011-HS\_2 S9 59 (1.117) Cn (Cen,4, 80.00, Ar); Sm (SG, 2x3.00); Sb (5,40.00); Cm (58:65)  
TOF MS ES+

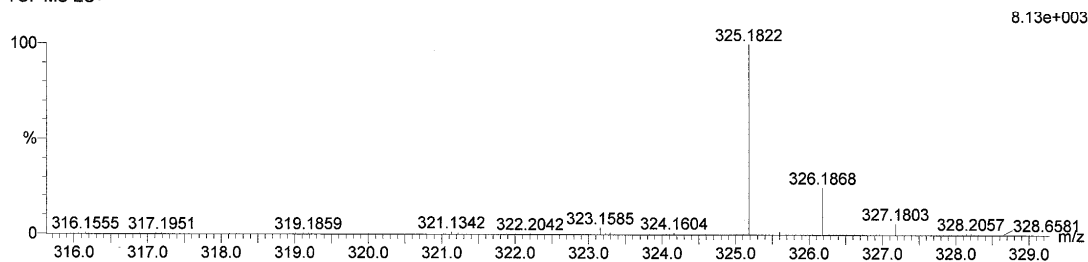

Minimum:

Maximum: 5.0 5.0 -1.5 50.0

| Mass     | Calc. Mass | mDa  | PPM  | DBE | i-FIT | Formula      |
|----------|------------|------|------|-----|-------|--------------|
| 325.1822 | 325.1834   | -1.2 | -3.7 | 9.5 | 76.6  | C20 H26 N2 P |

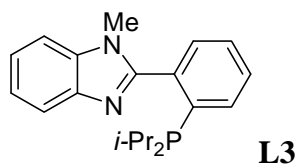

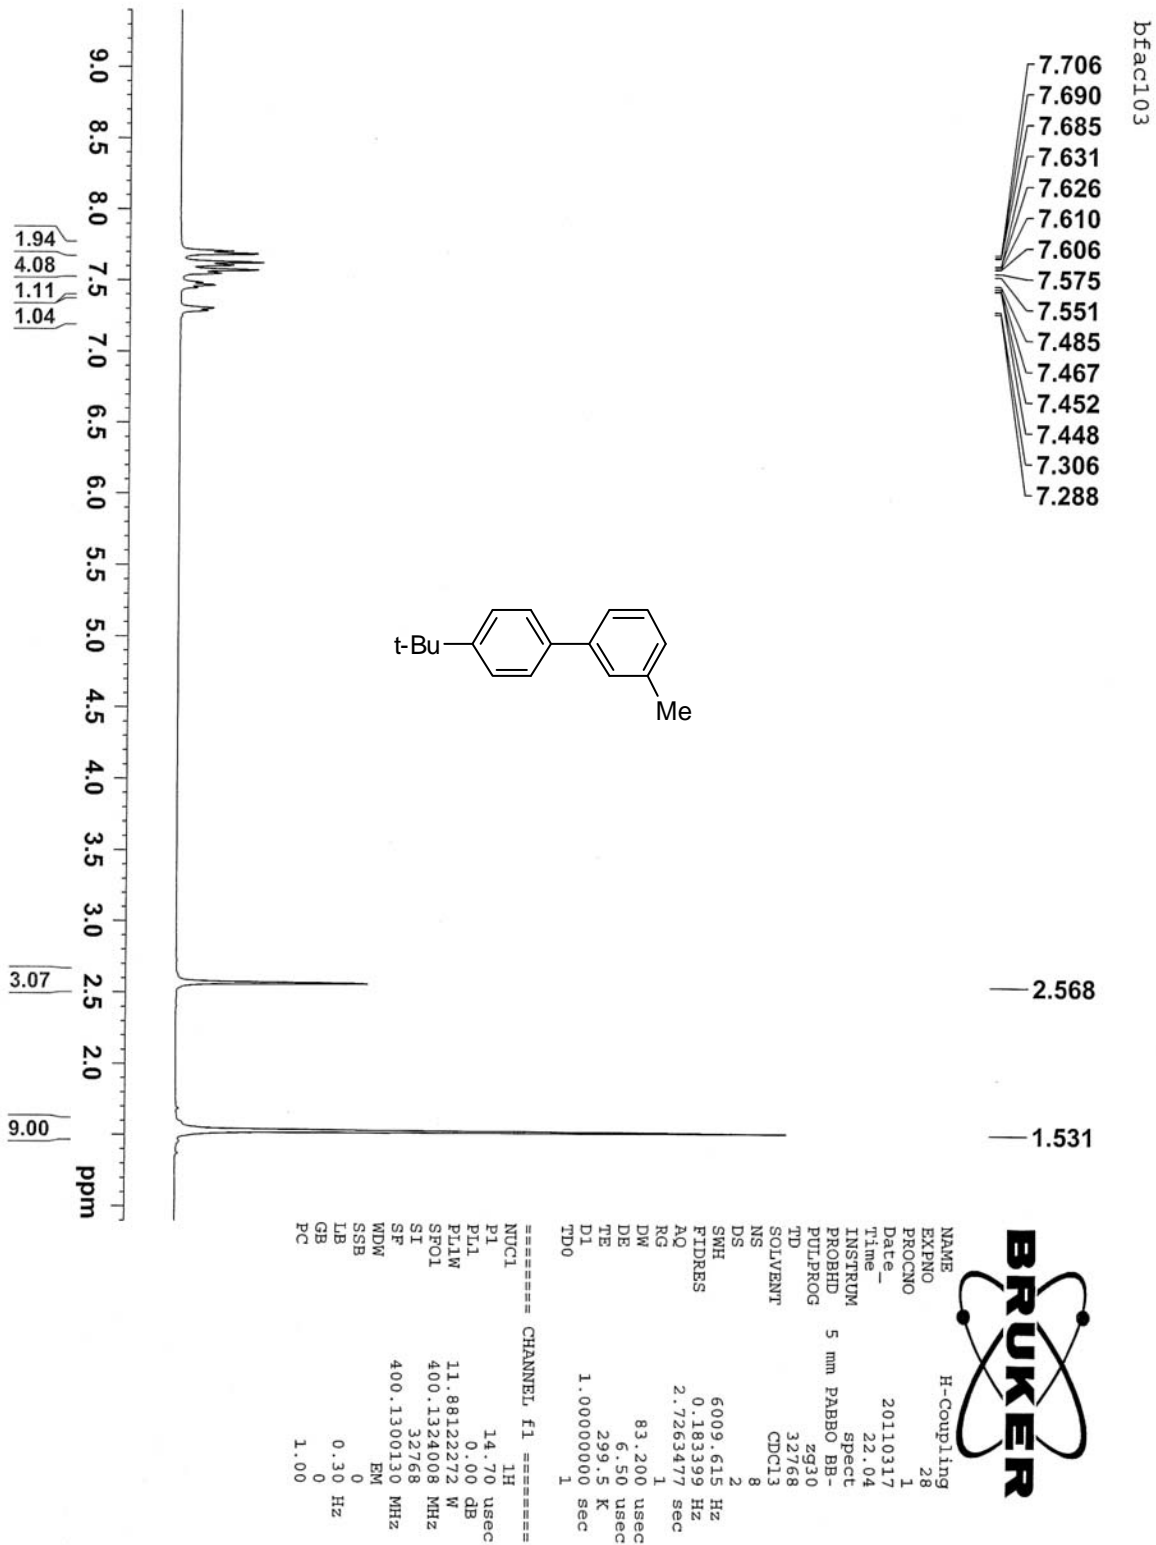

bFac103

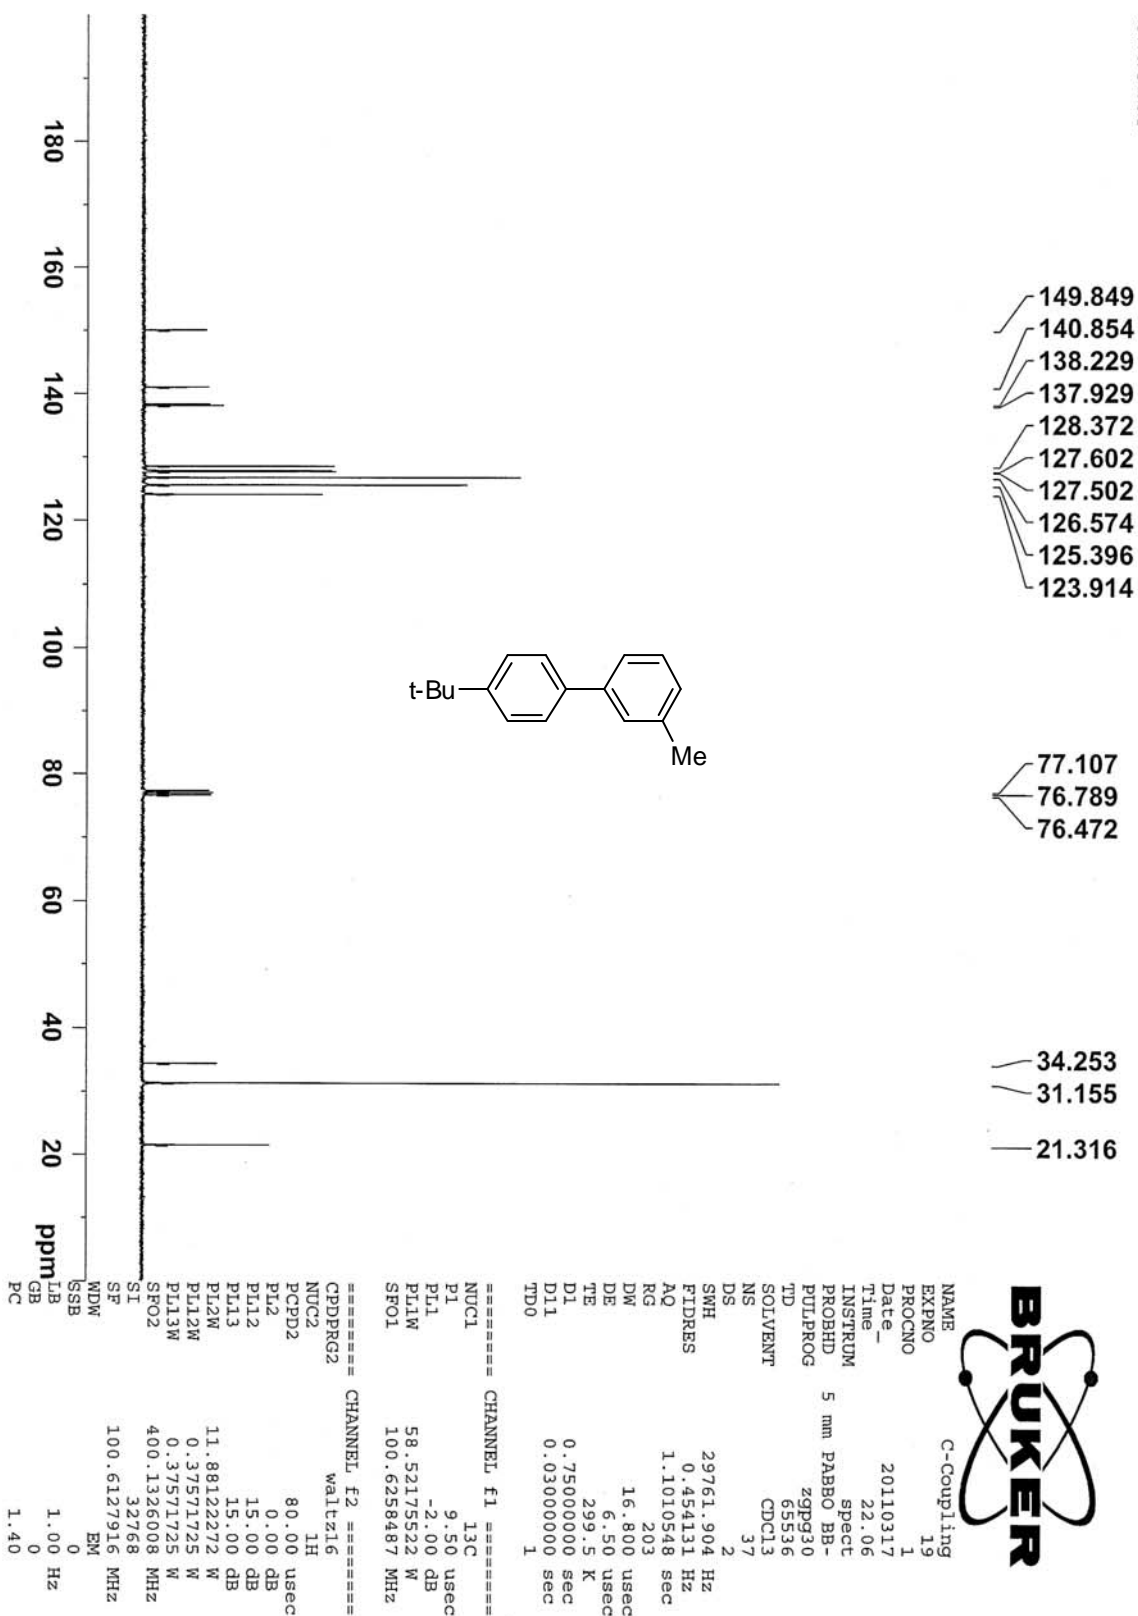



File : C:\msdchem\1\DATA\cmso\BFAC103.D  
Operator : Seam  
Acquired : 15 Mar 2011 19:27 using AcqMethod JIM2.M  
Instrument : 5973N  
Sample Name :  
Misc Info :  
Vial Number: 3

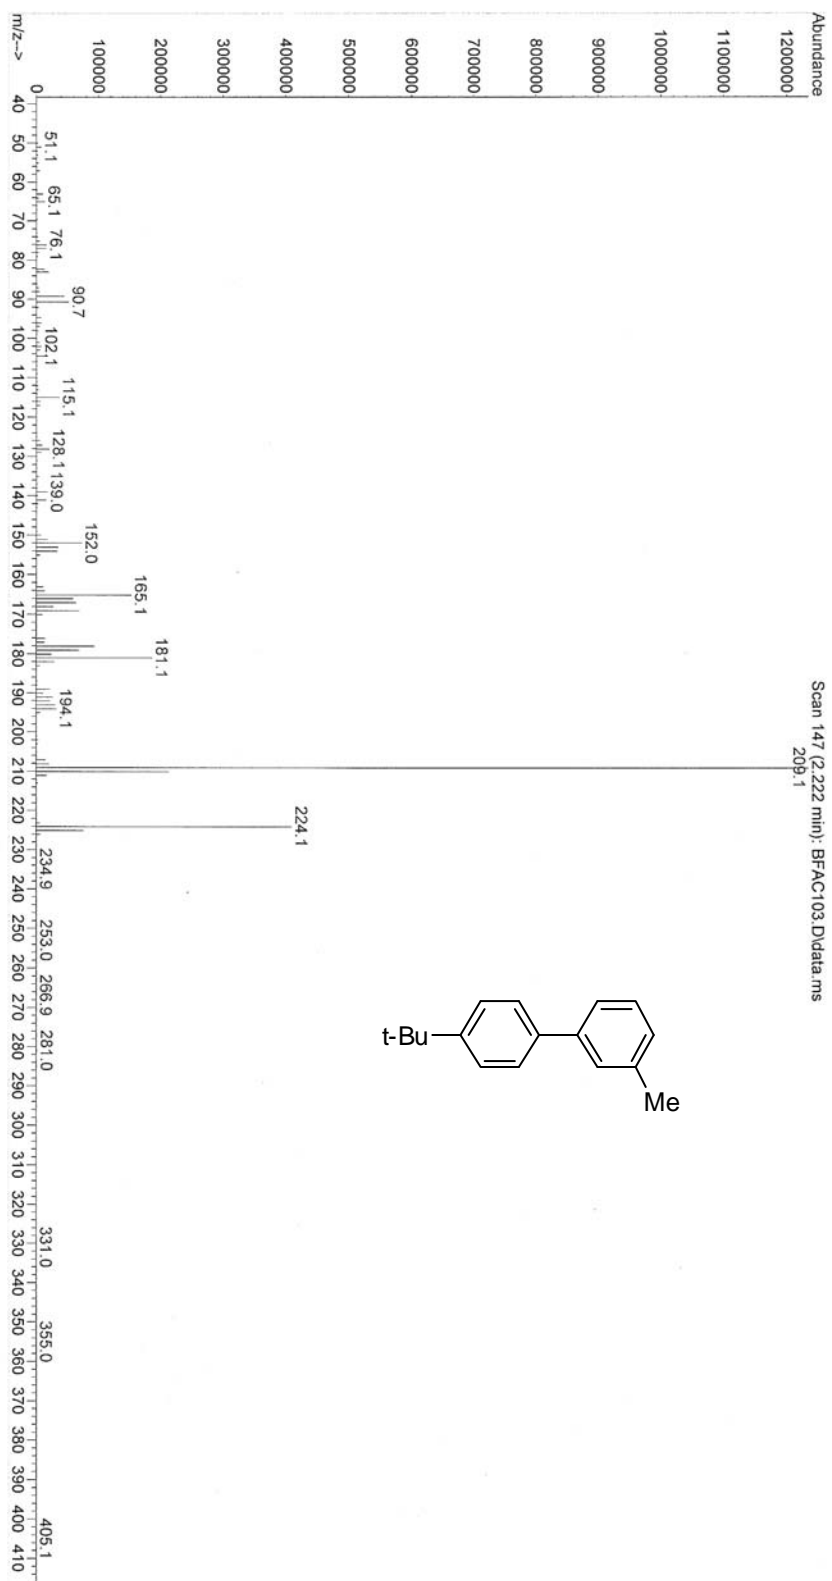

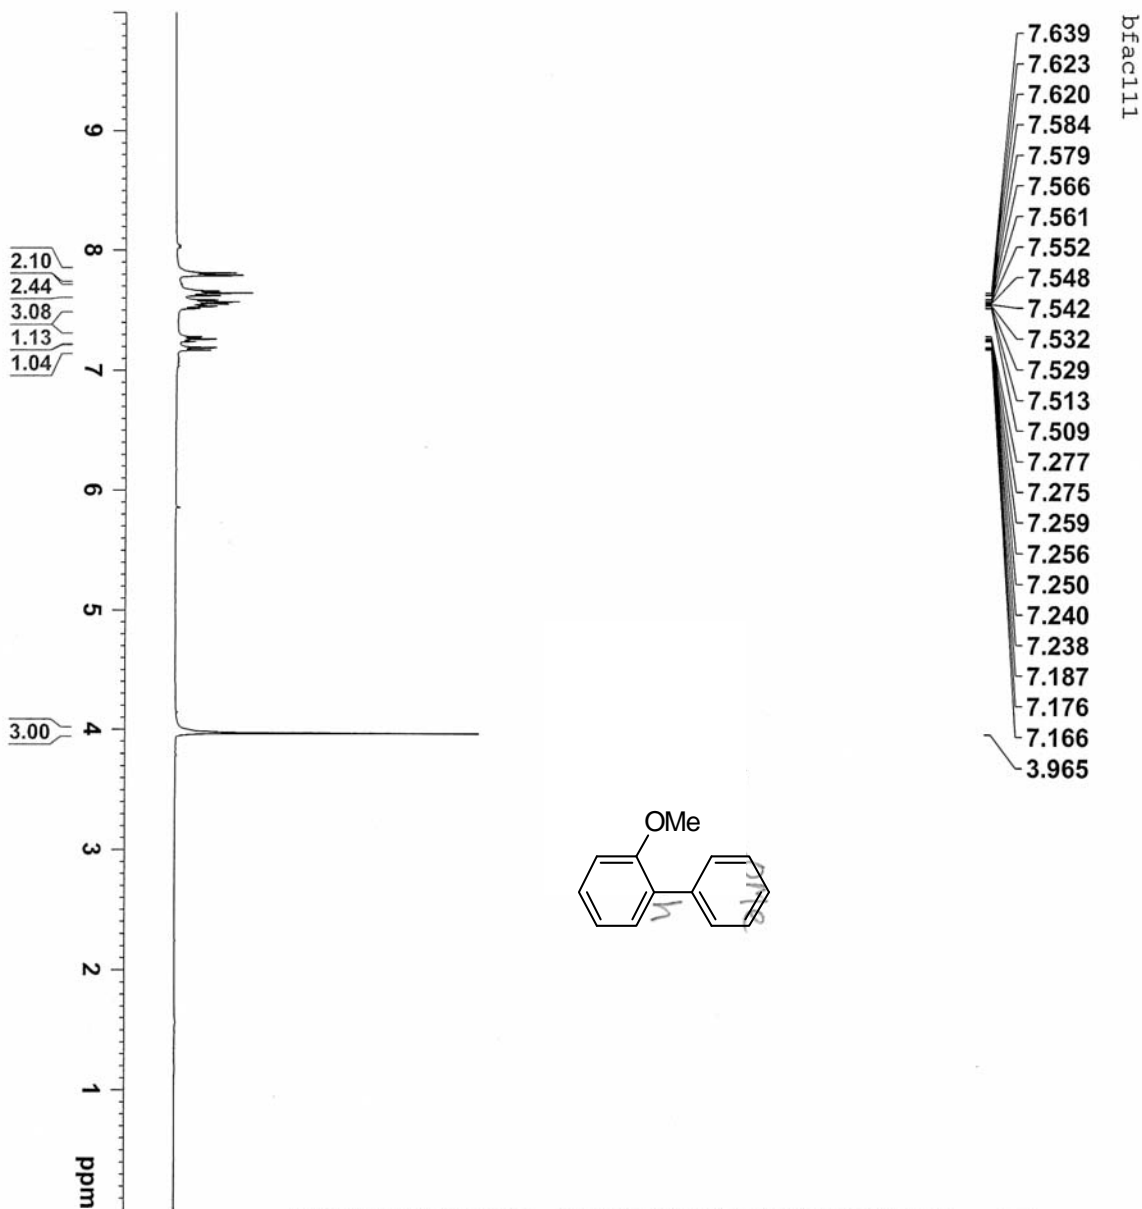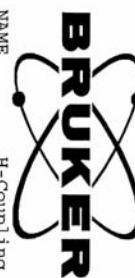

```

NAME H-Coupling
EXPNO 27
PROCNO 1
Date_ 20110317
Time 20.35
INSTRUM spect
PROBHD 5 mm PABBO BB-
PULPROG zg30
TD 32768
SOLVENT CDCl3
NS 32
DS 2
SWH 6009.615 Hz
FIDRES 0.183399 Hz
AQ 2.7263477 sec
RG 1
DE 83.200 usec
TE 299.4 K
D1 1.00000000 sec
TD0 1

===== CHANNEL f1 =====
NUC1 1H
P1 14.70 usec
PL1 0.00 dB
PL1W 11.89122272 W
SF01 400.1324008 MHz
SI 32768
SF 400.1300130 MHz
WDW EM
SSB 0
LB 0.30 Hz
GB 0
PC 1.00
    
```

bfac111

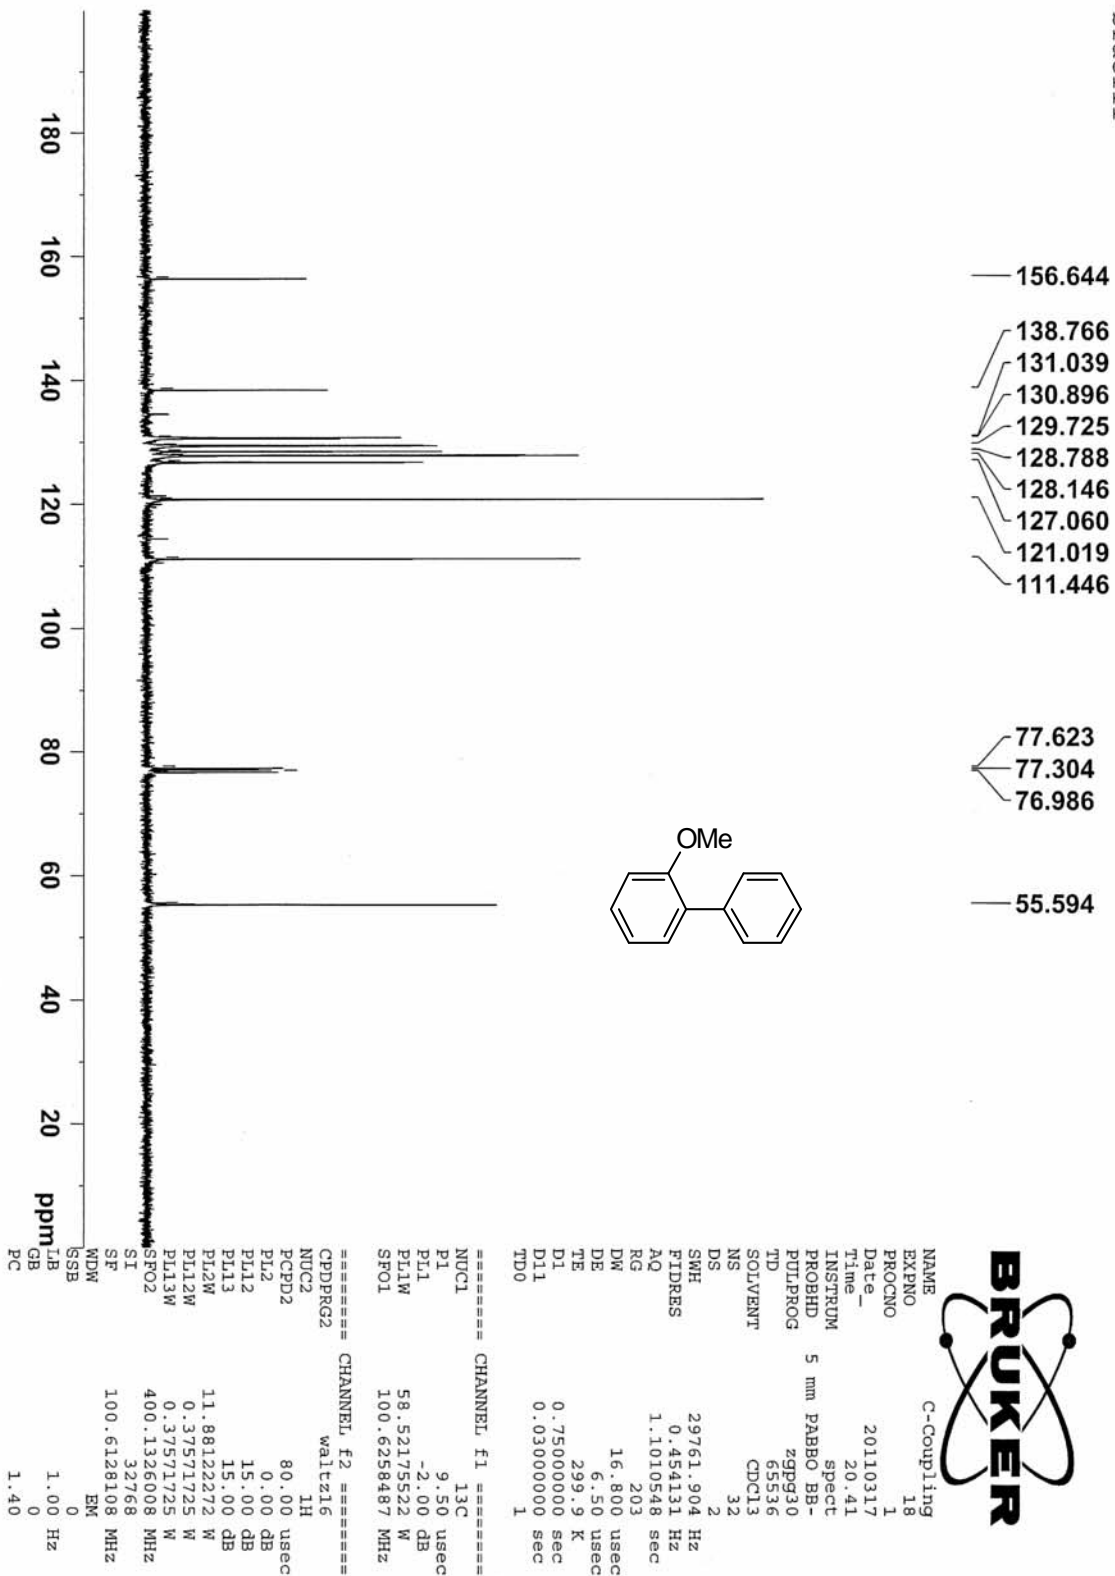

File : C:\msdchem\1\DATA\tai\2011\bfac111.D  
Operator : Seam  
Acquired : 17 Mar 2011 19:06 using AcqMethod JIM2.M  
Instrument : 5973N  
Sample Name :  
Misc Info :  
Vial Number: 8

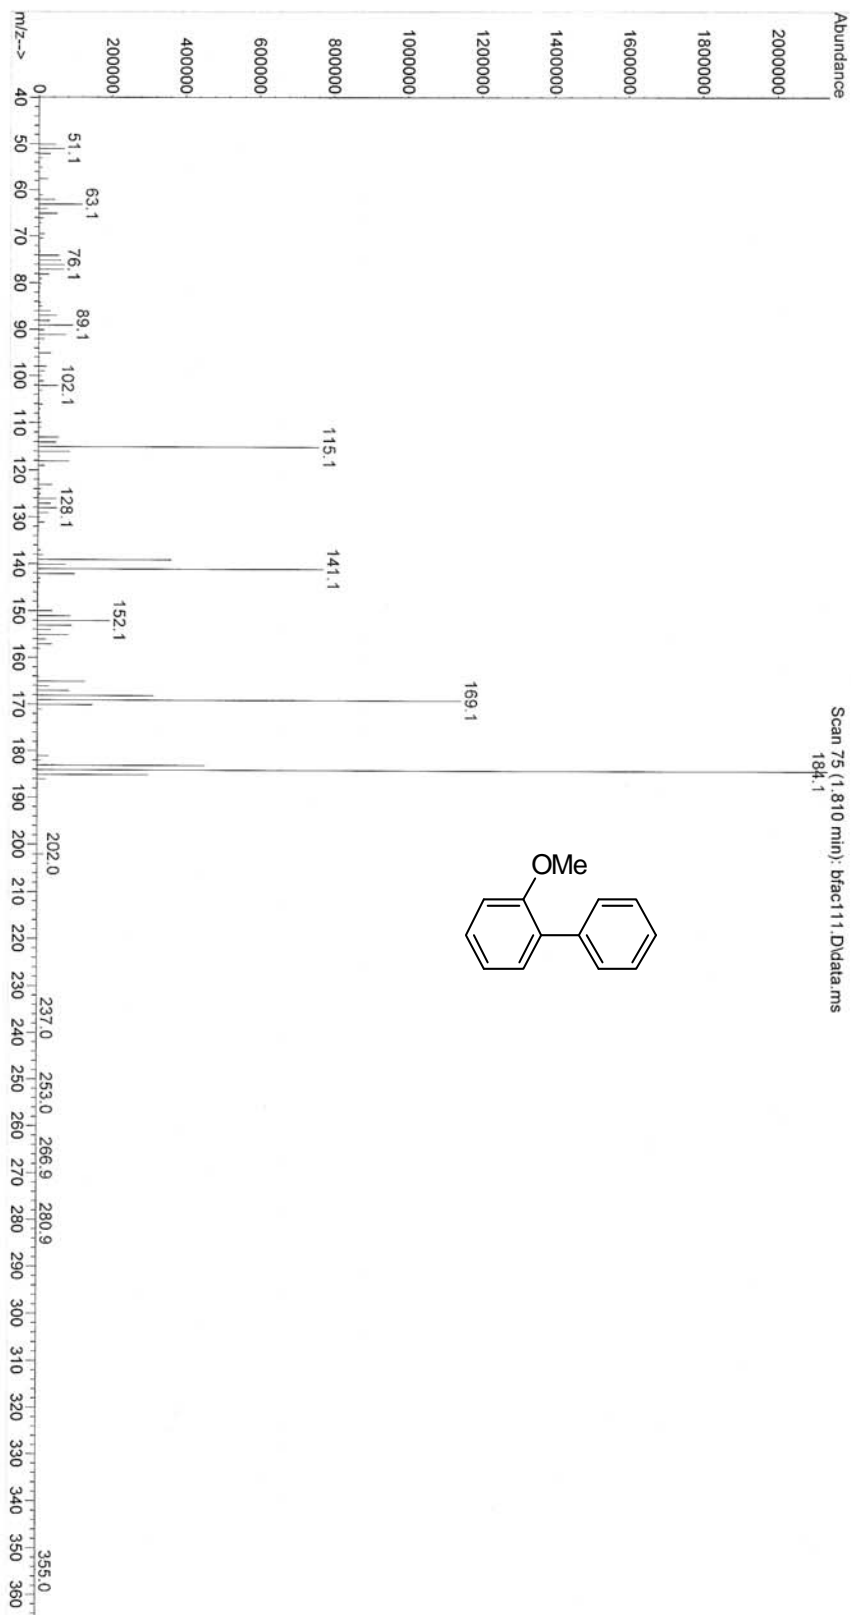

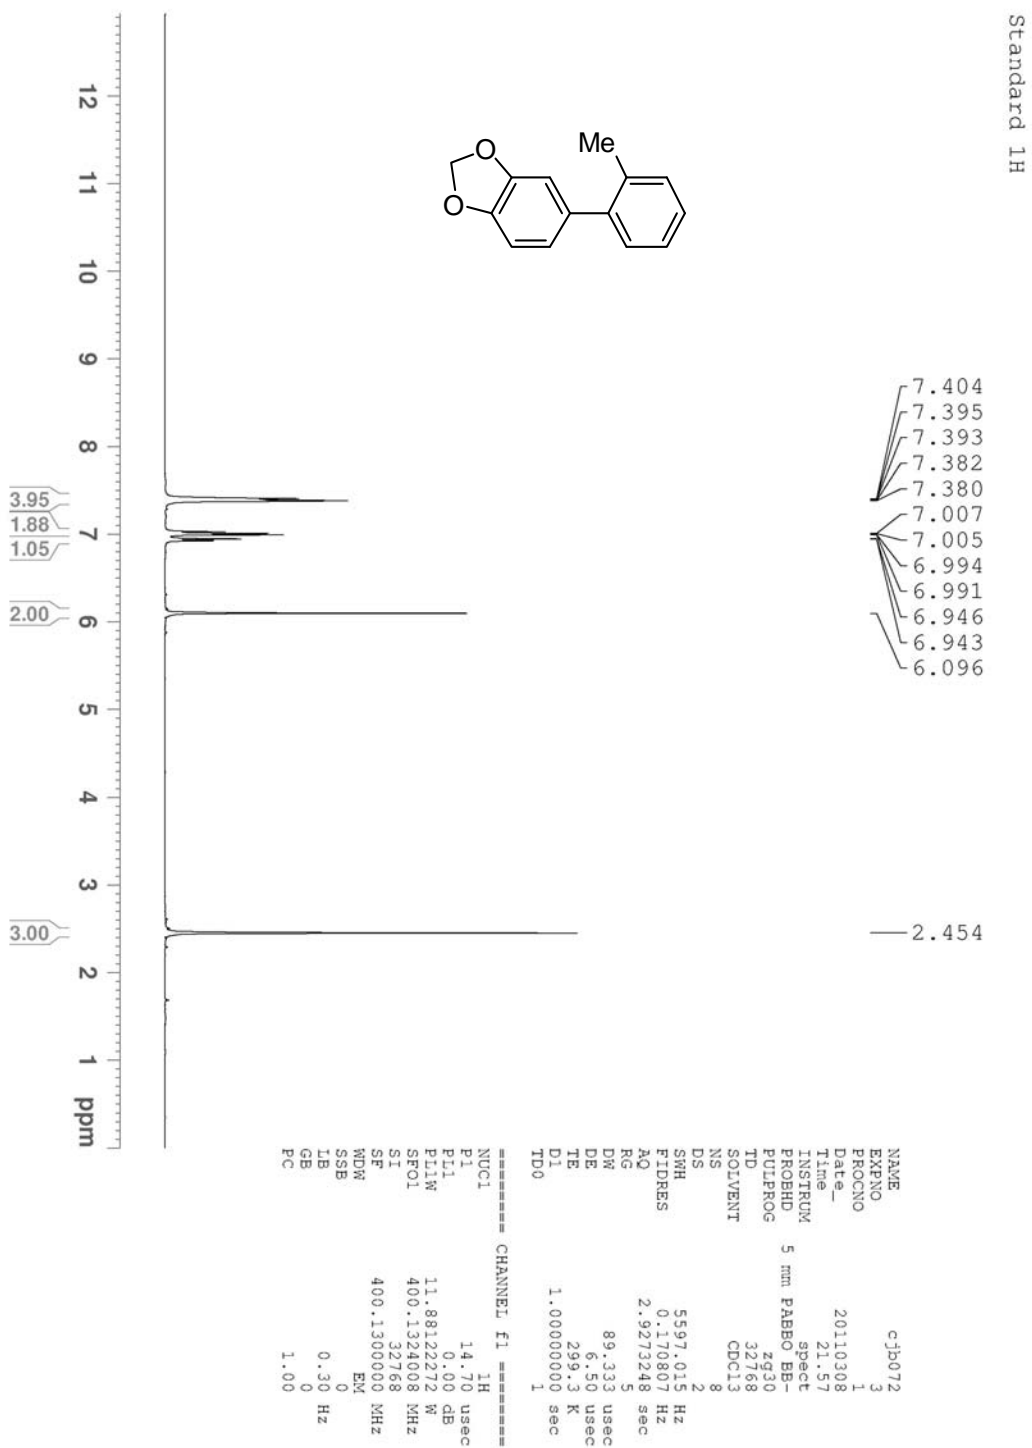

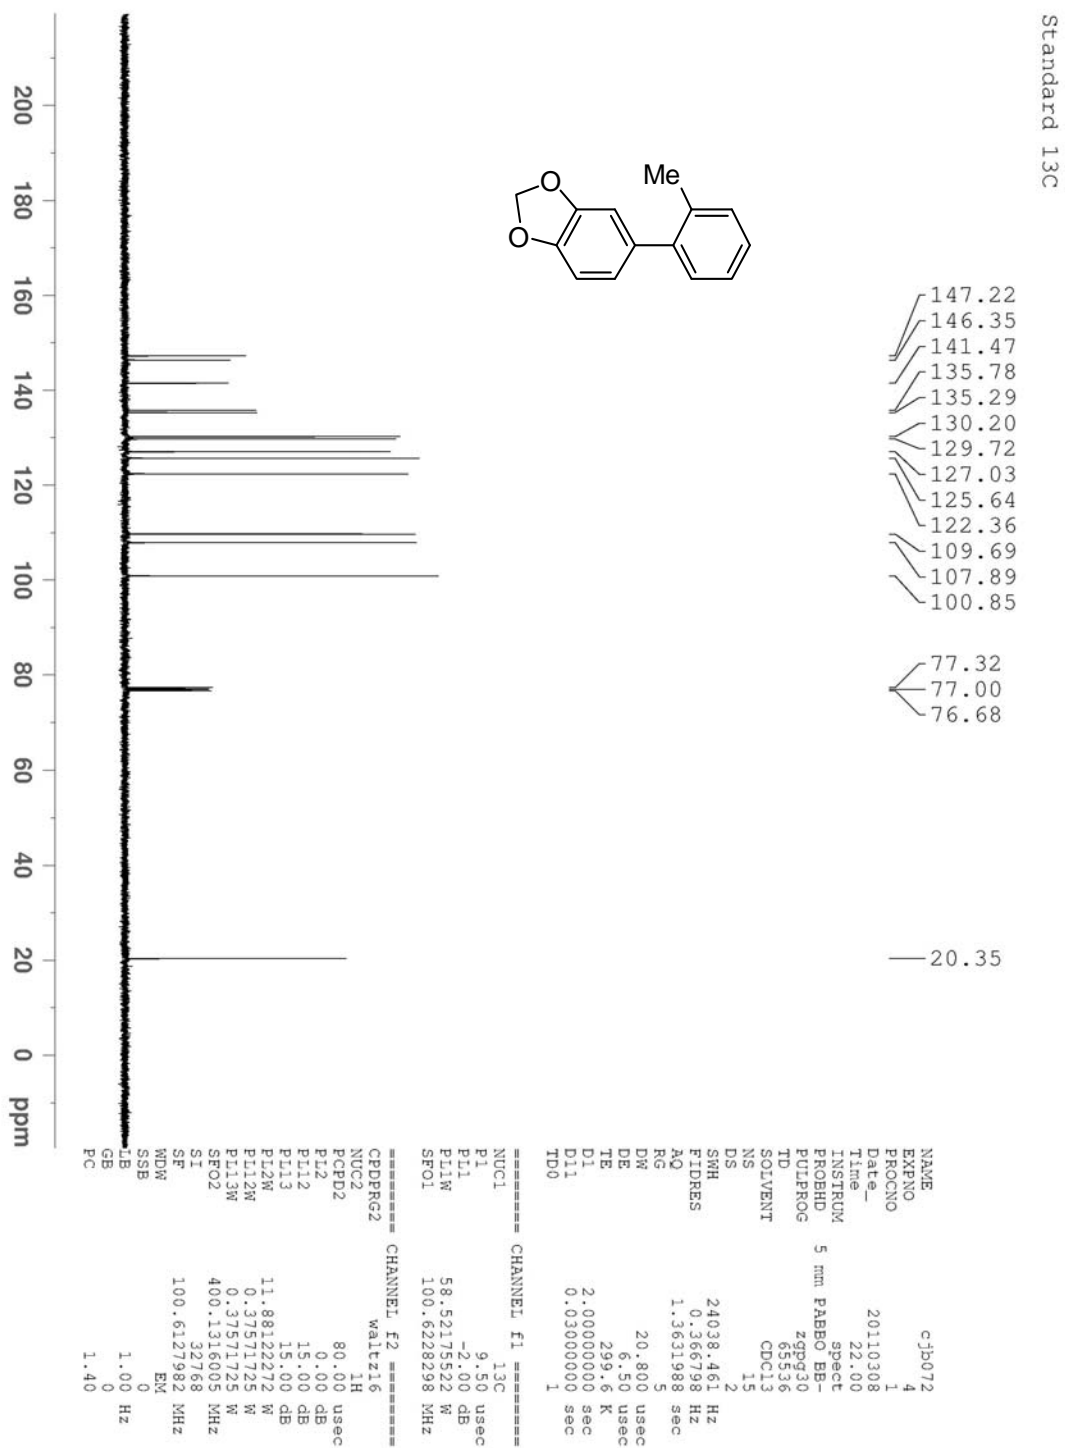

File : C:\msdchem\1\DATA\JIM\CJB072.D  
Operator : Seam  
Acquired : 26 Feb 2011 11:33 using AcqMethod METHOD2.M  
Instrument : 5973N  
Sample Name :  
Misc Info :  
Vial Number: 1

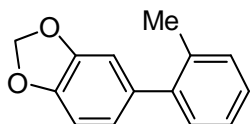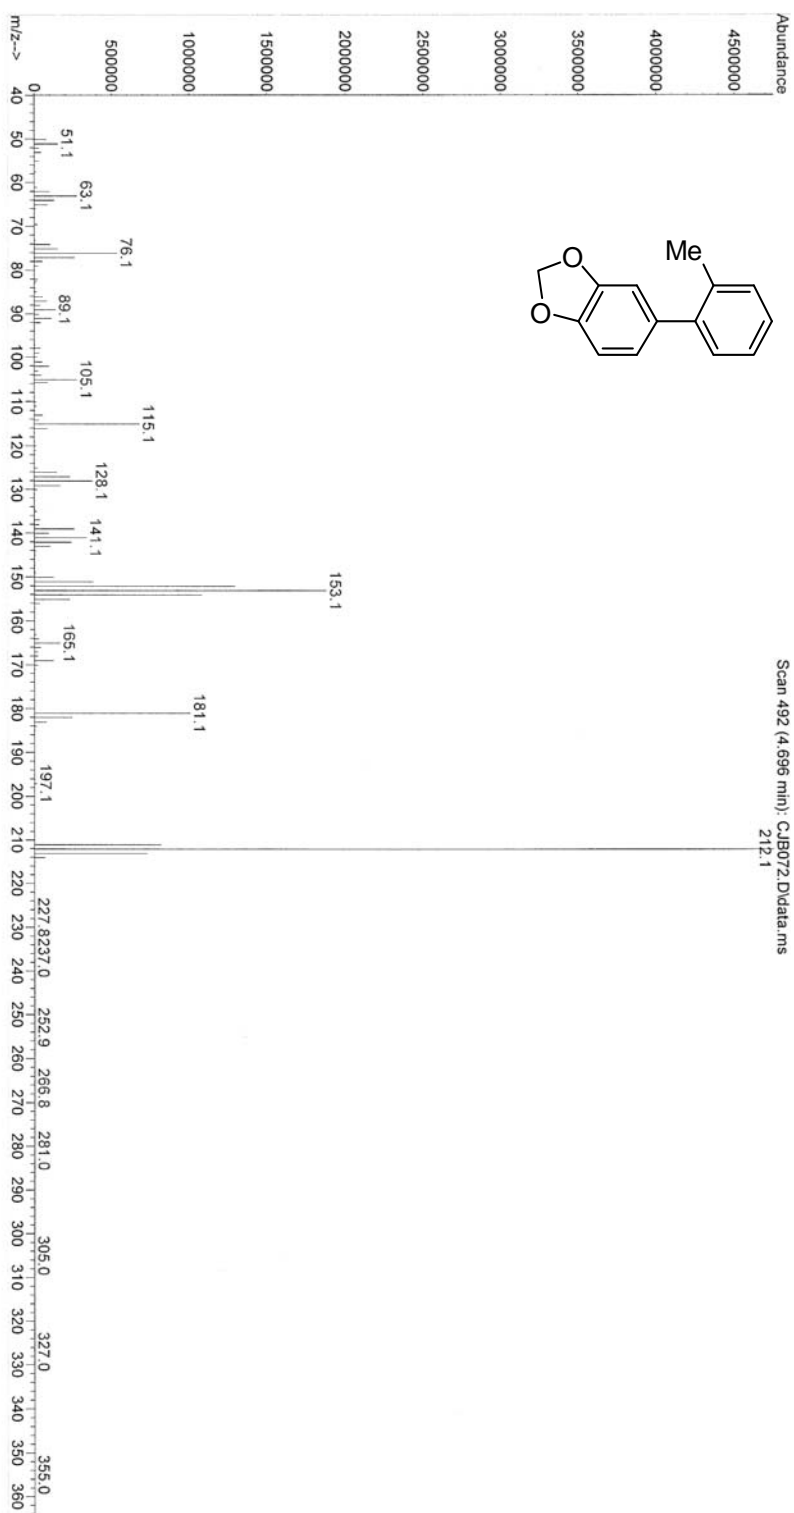

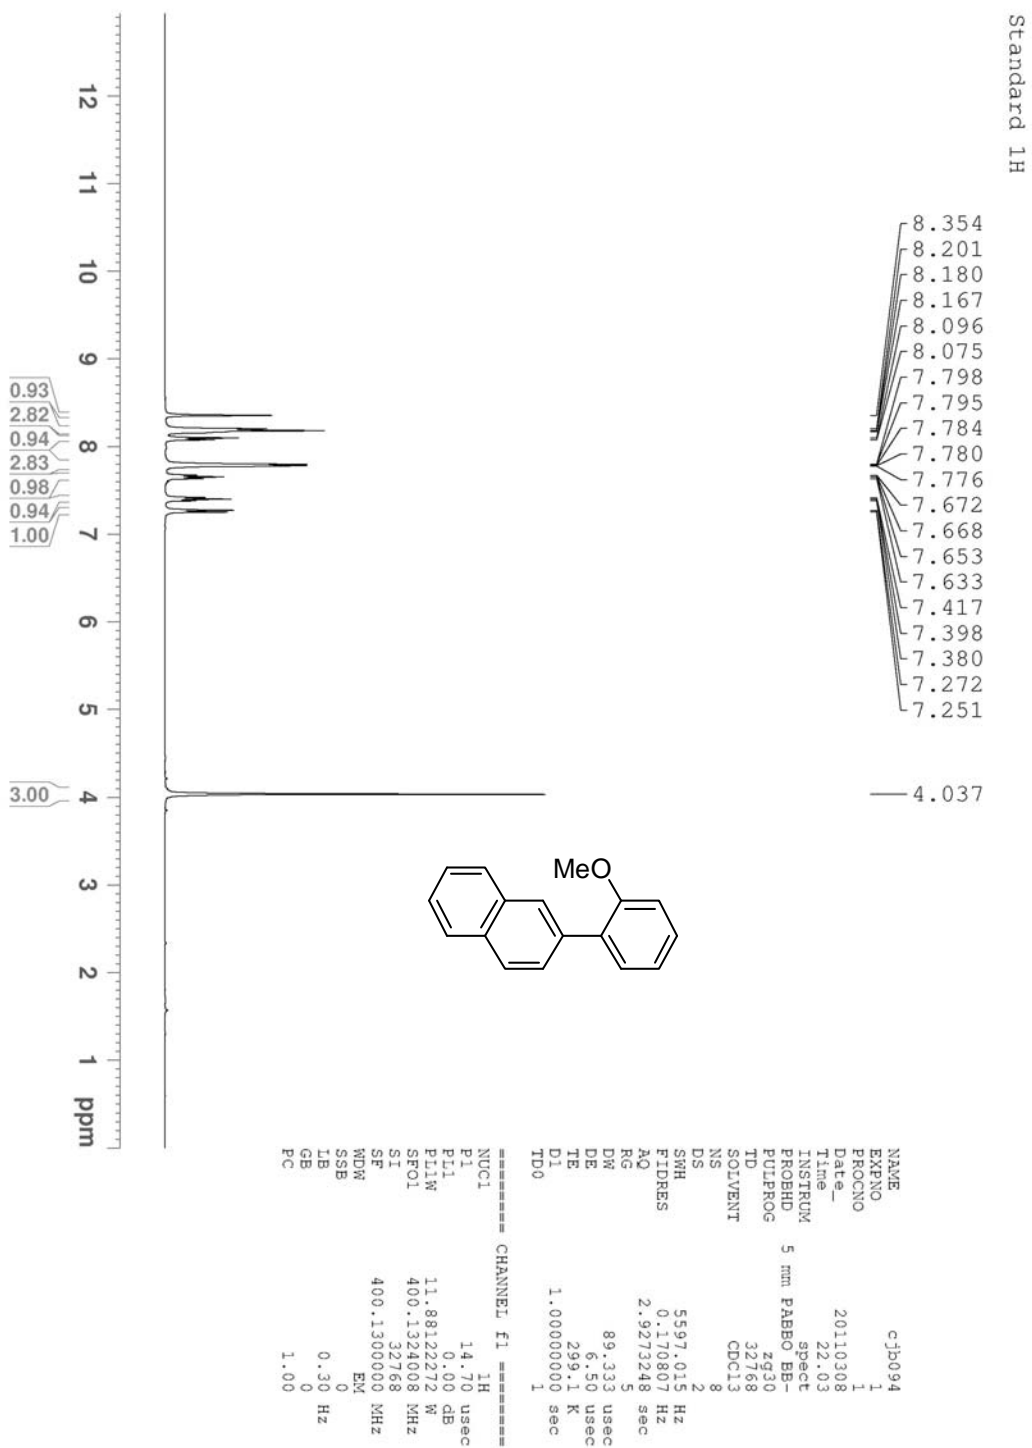



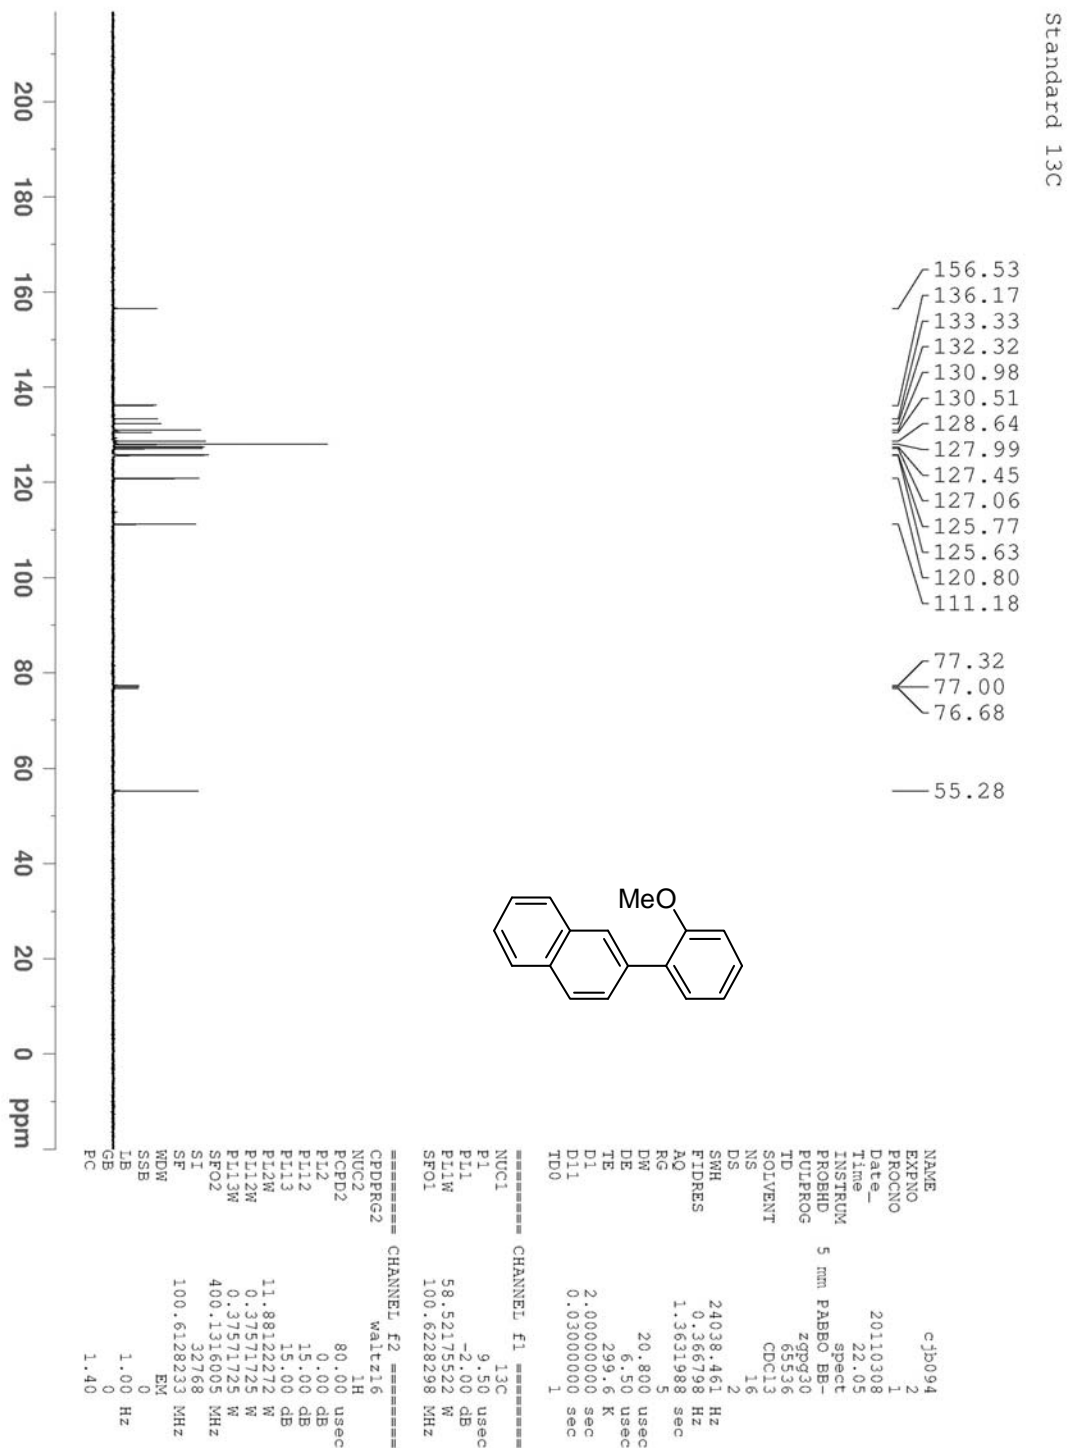

File : C:\msdchem\1\DATA\JIM\cjb094-crude.D  
Operator : Seam  
Acquired : 5 Mar 2011 23:40 using AcqMethod METHOD2.M  
Instrument : 5973N  
Sample Name :  
Misc Info :  
Vial Number: 3

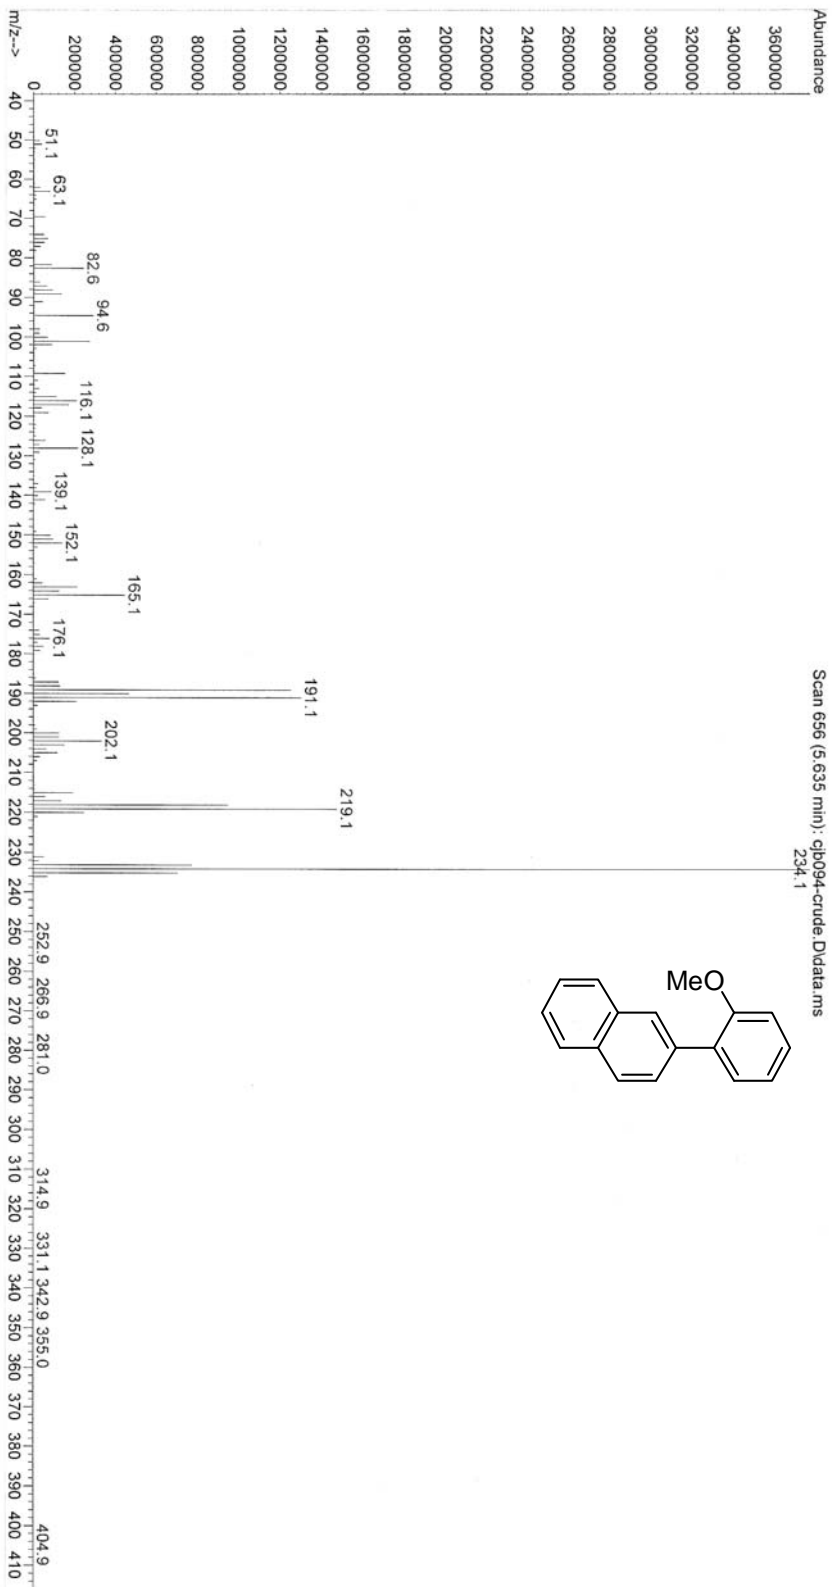

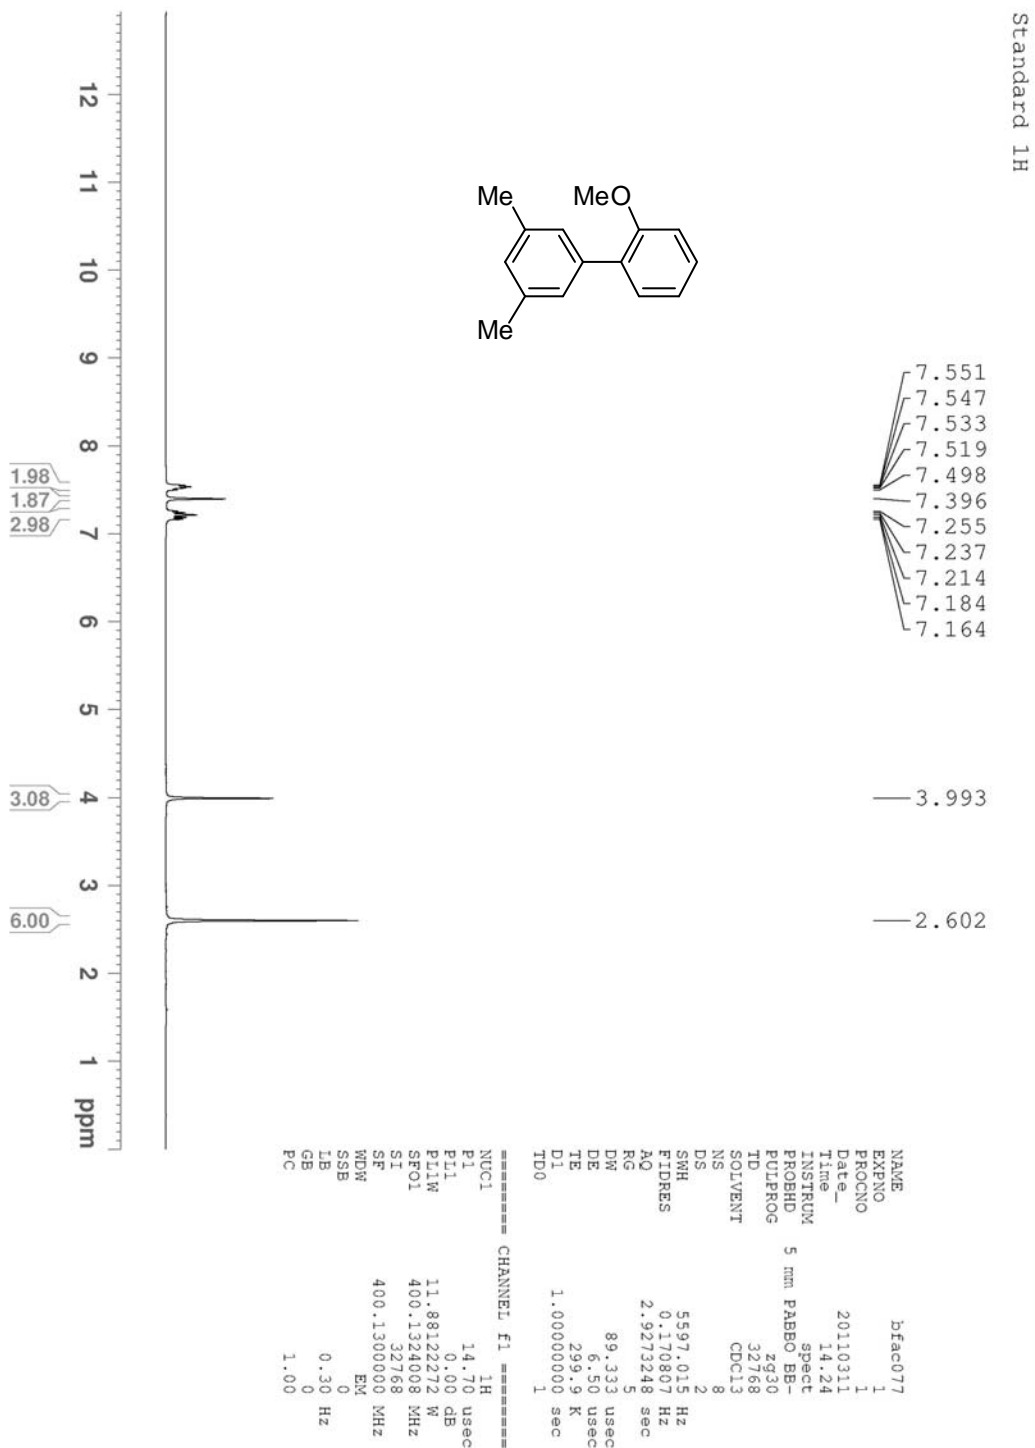

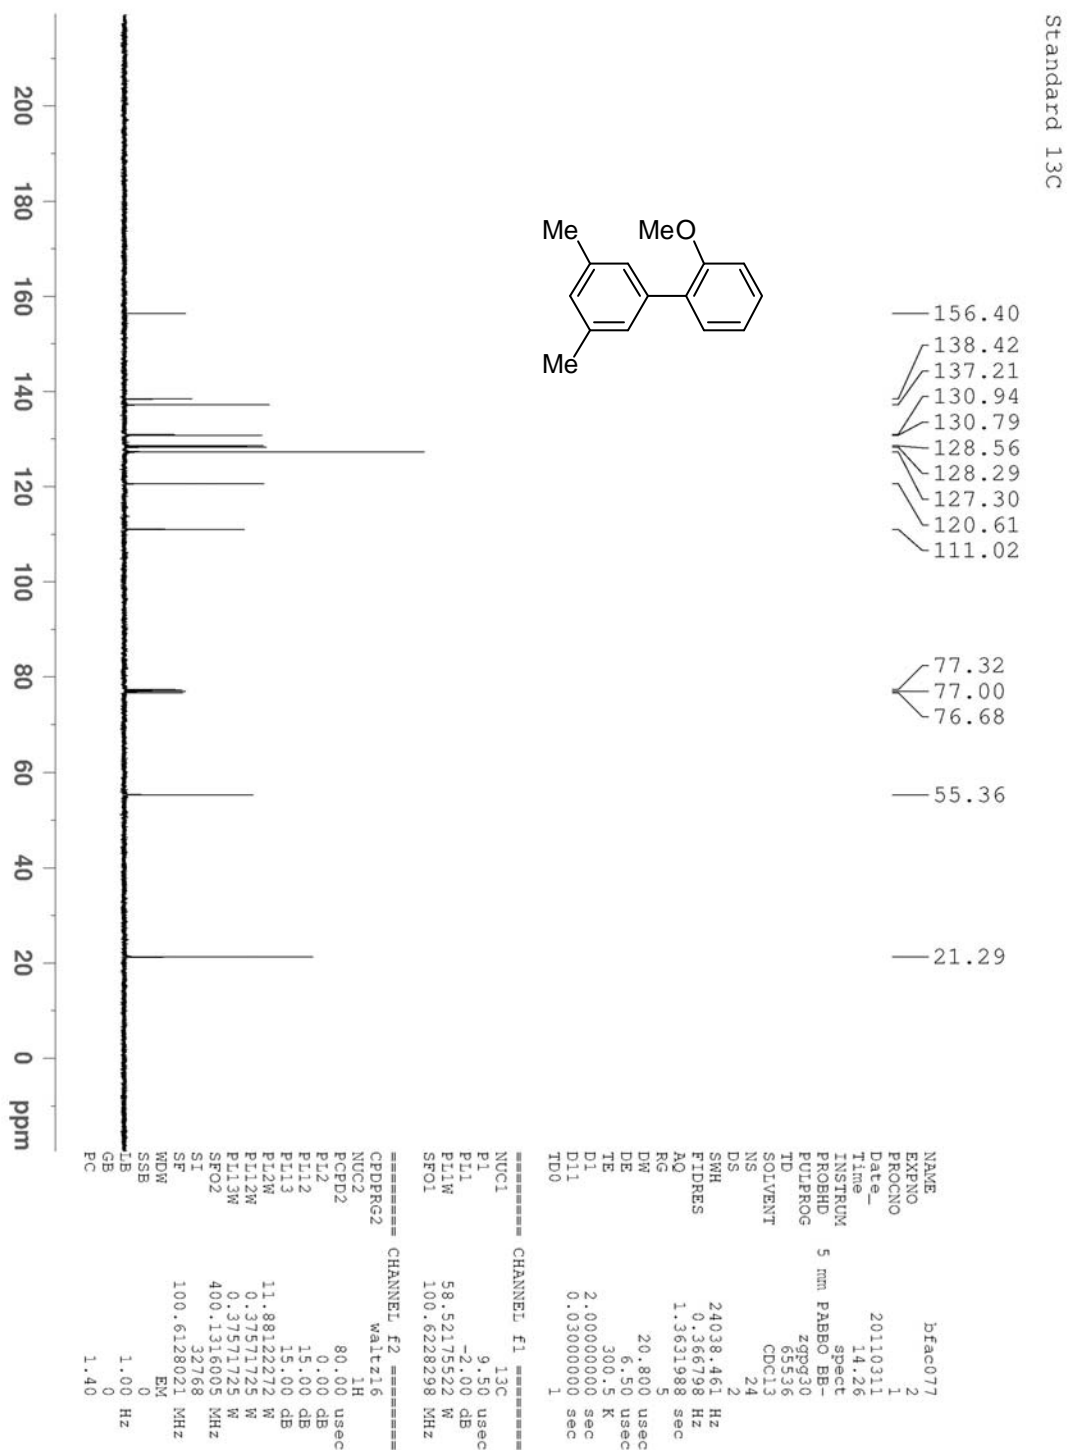

Supporting Information

File : C:\msdchem\1\DATA\cmso\bfac77.D  
Operator : Seam  
Acquired : 10 Mar 2011 15:58 using AcqMethod JIM2.M  
Instrument : 5973N  
Sample Name :  
Misc Info :  
Vial Number: 6

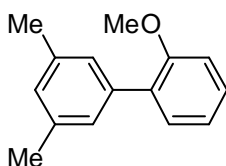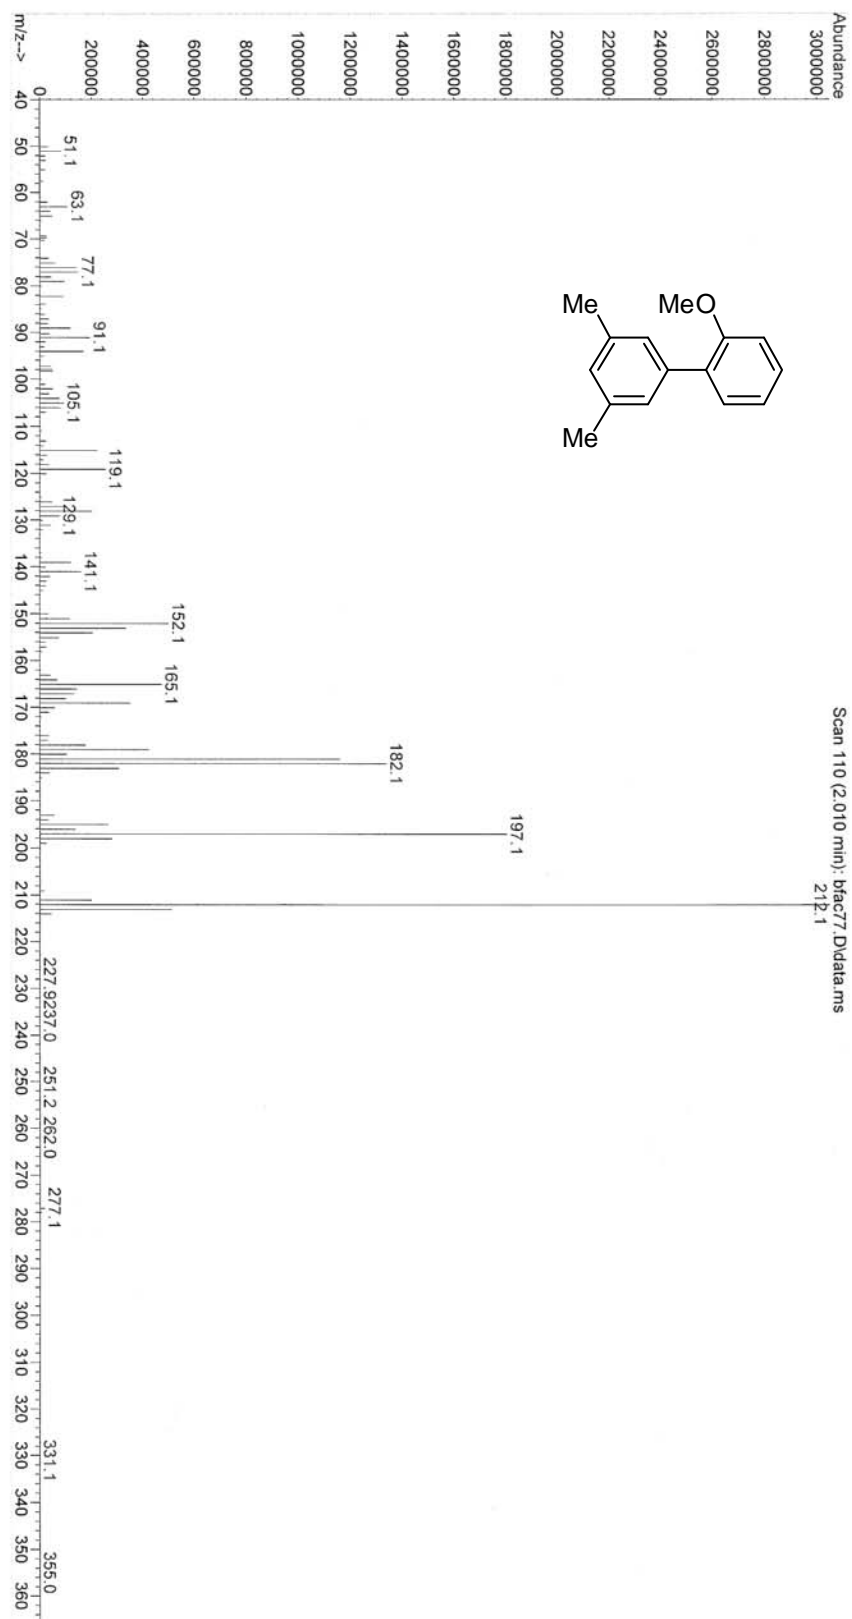

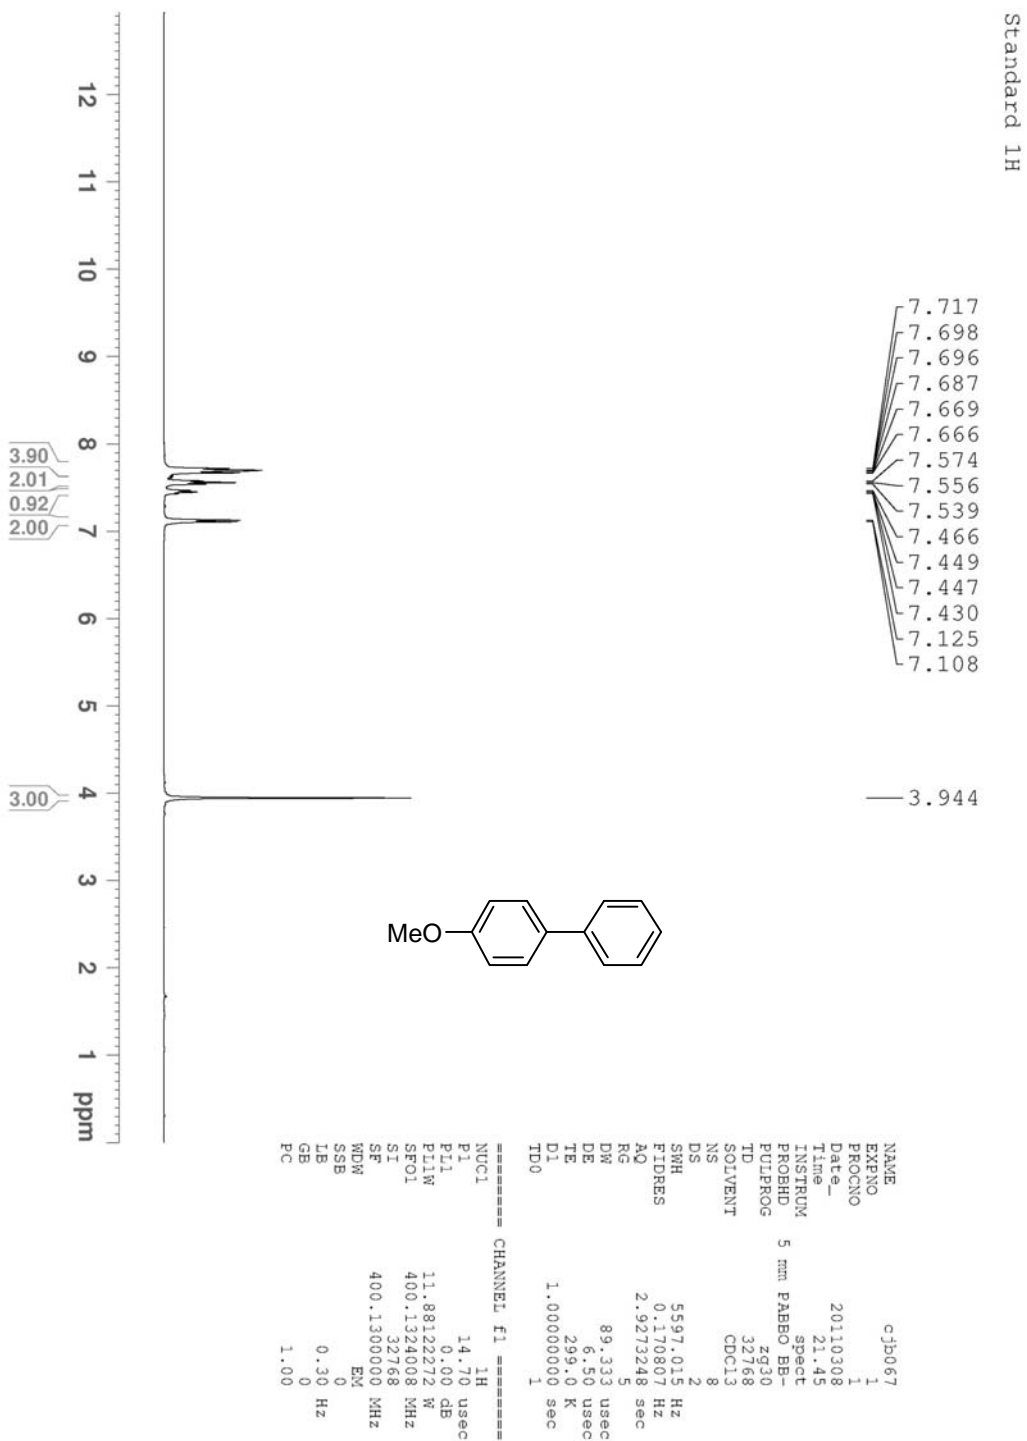

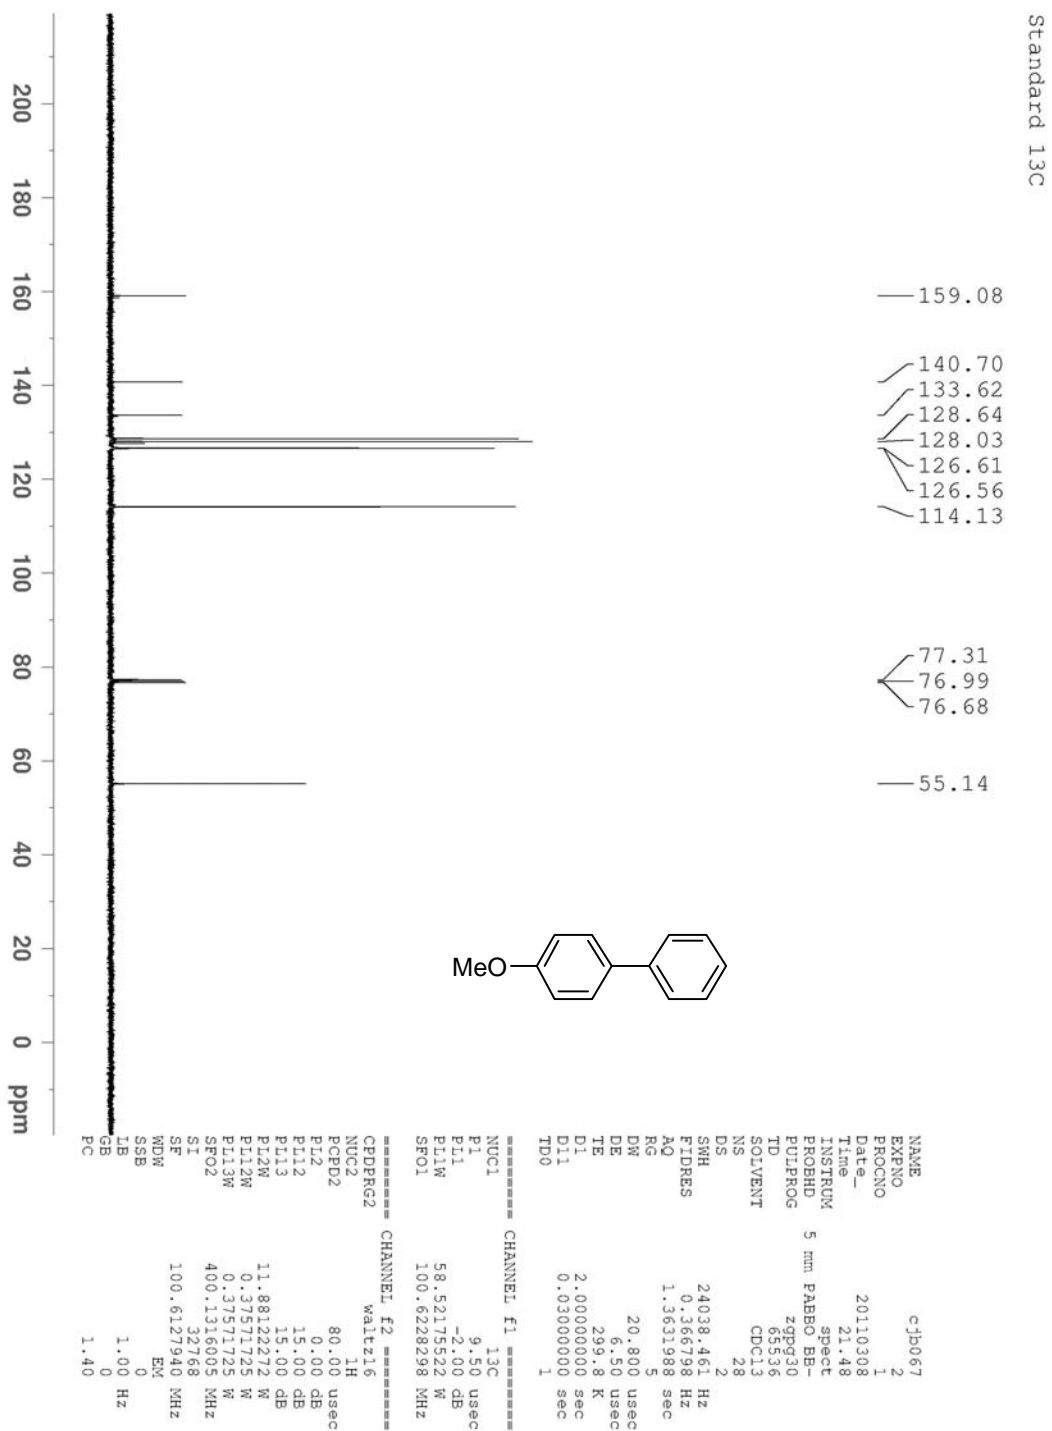

Supporting Information

File : C:\msdchem\1\DATA\JIM\CJB067.D  
Operator : Seam  
Acquired : 26 Feb 2011 12:22 using AcqMethod METHOD2.M  
Instrument : 5973N  
Sample Name :  
Misc Info :  
Vial Number: 4

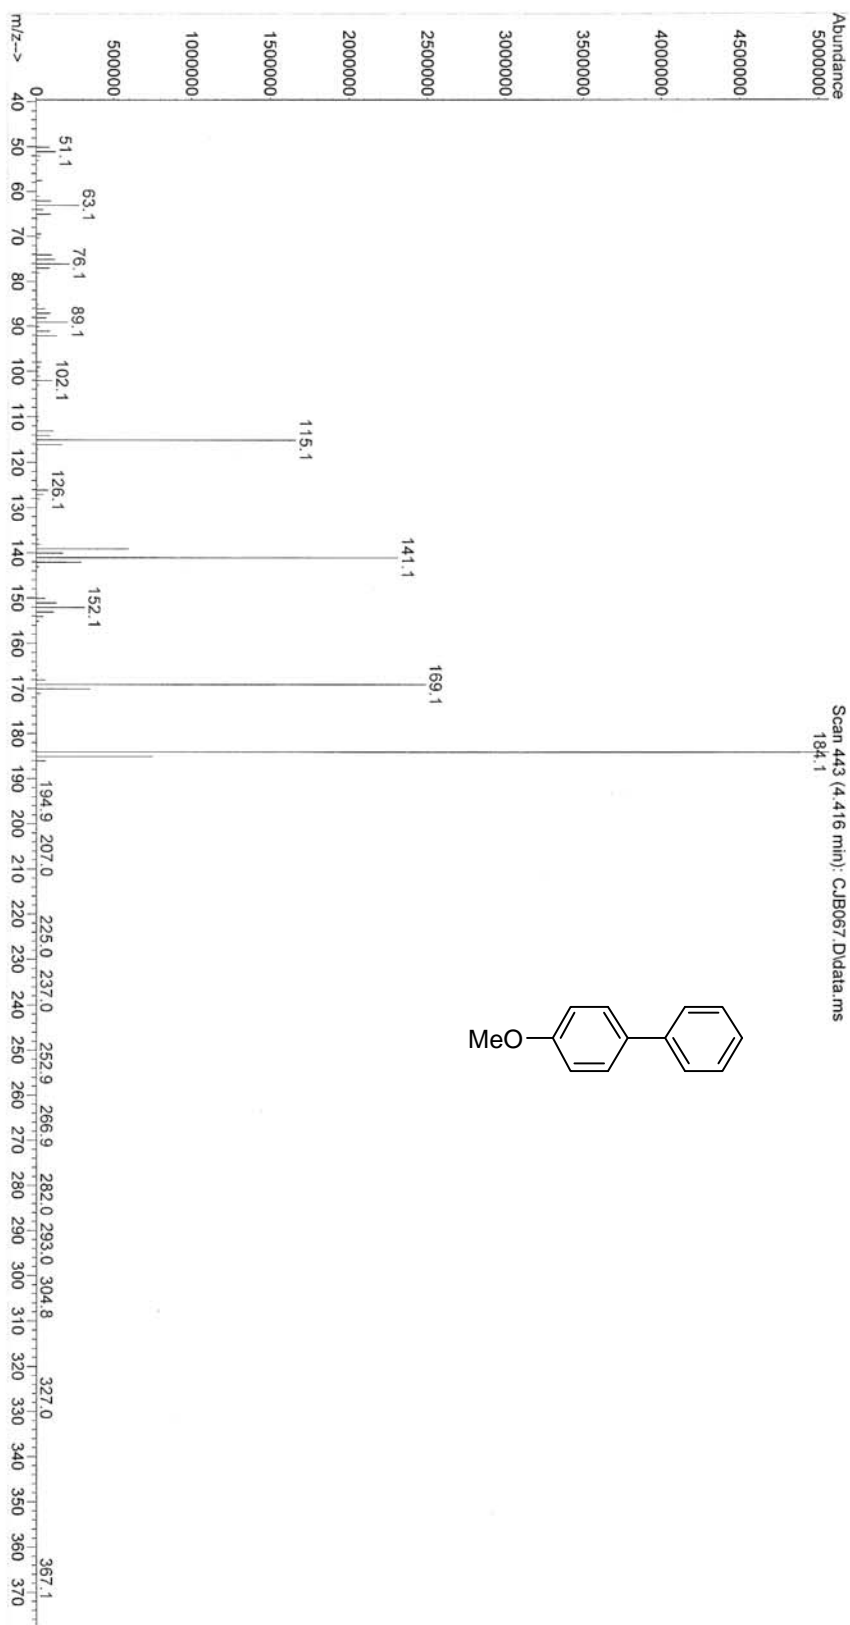



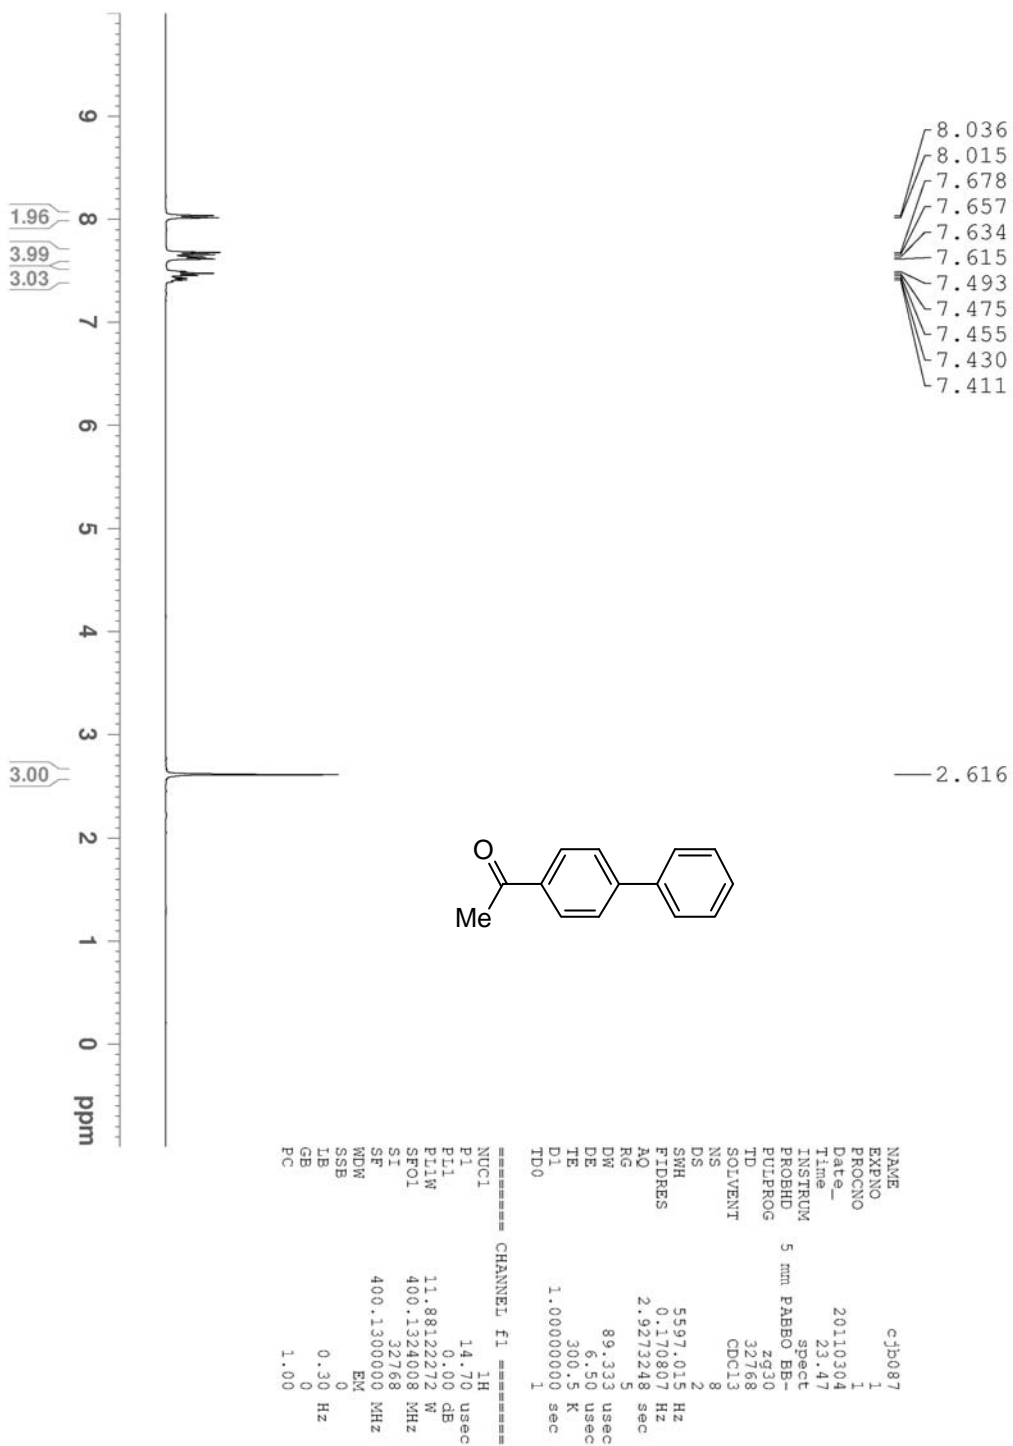

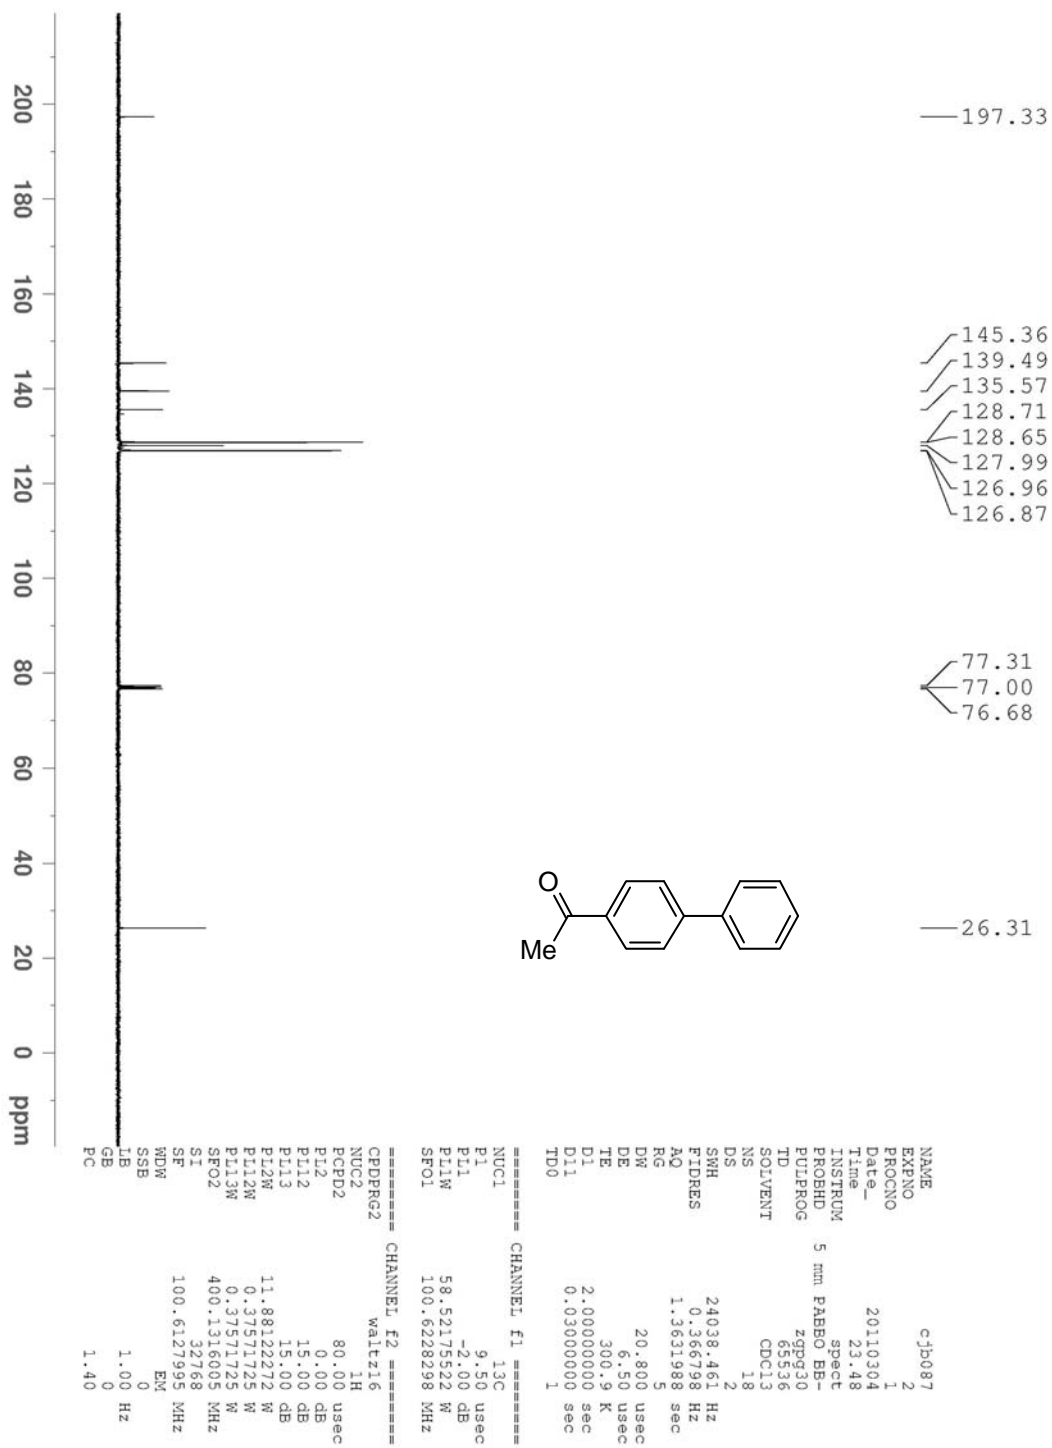

File : C:\msdchem\1\DATA\cmso\cjb87.D  
Operator : Seam  
Acquired : 4 Mar 2011 14:24 using AcqMethod METHOD2.M  
Instrument : 5973N  
Sample Name :  
Misc Info :  
Vial Number: 1

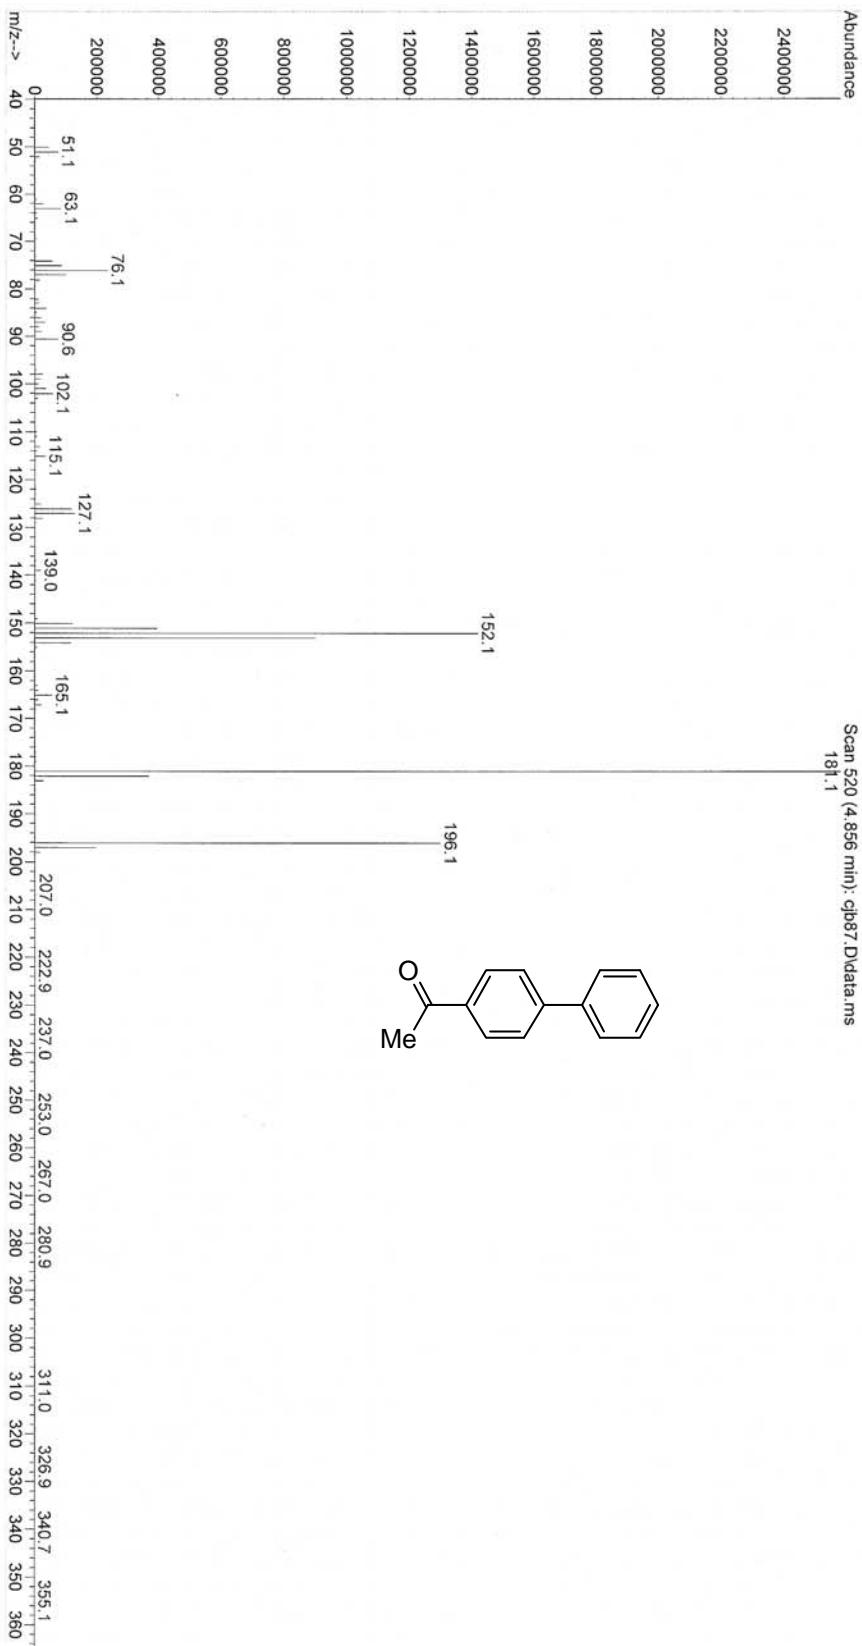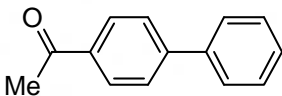

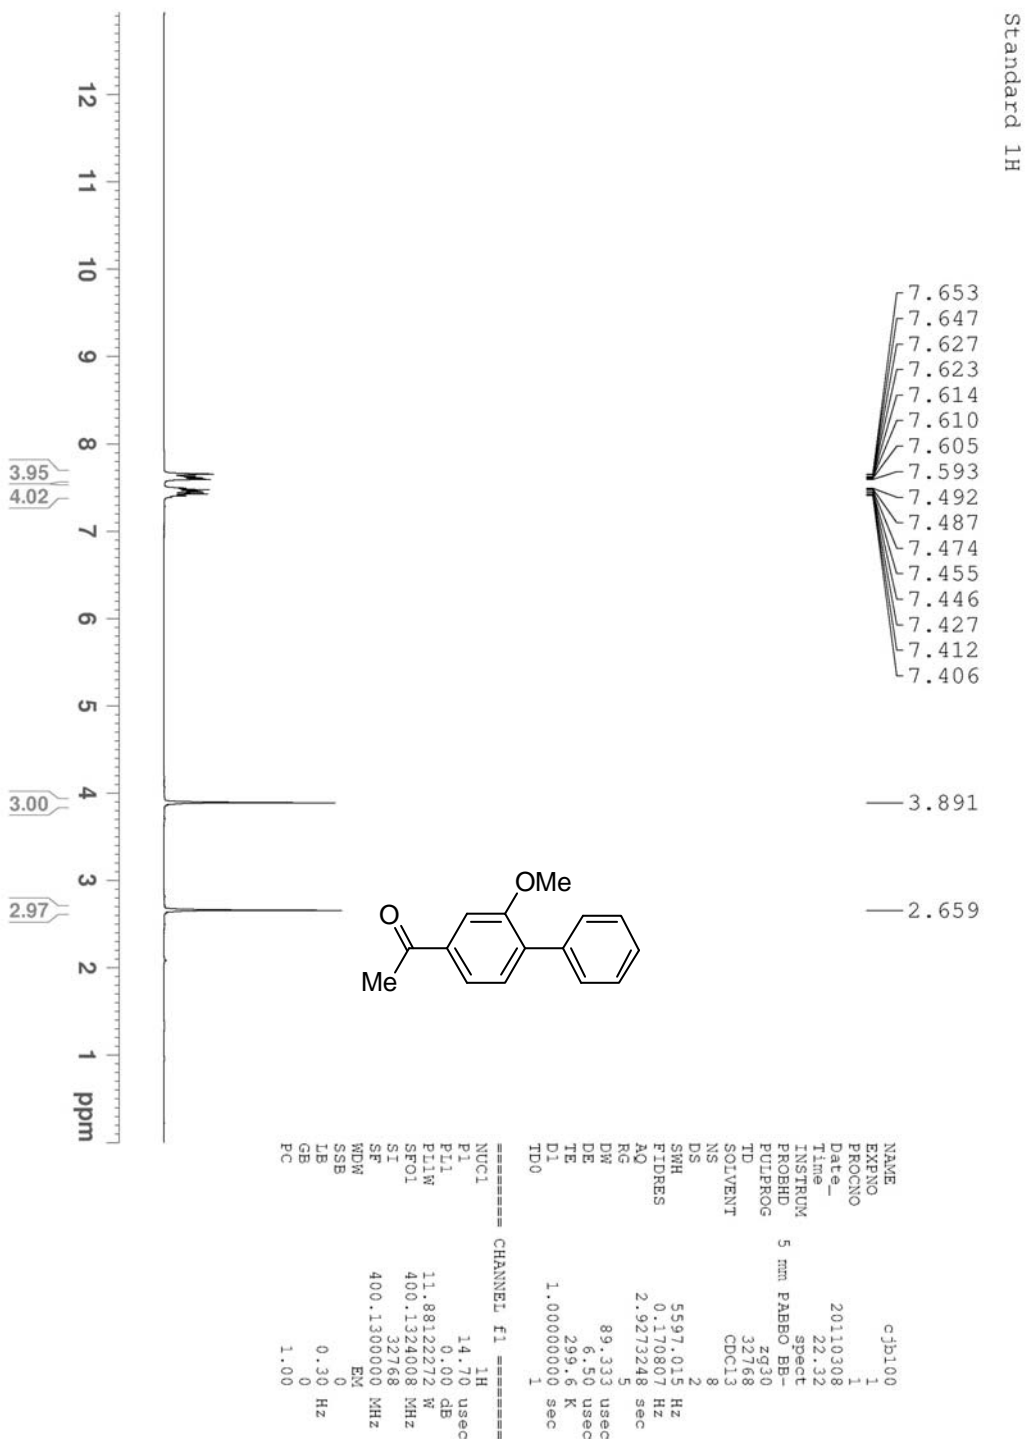

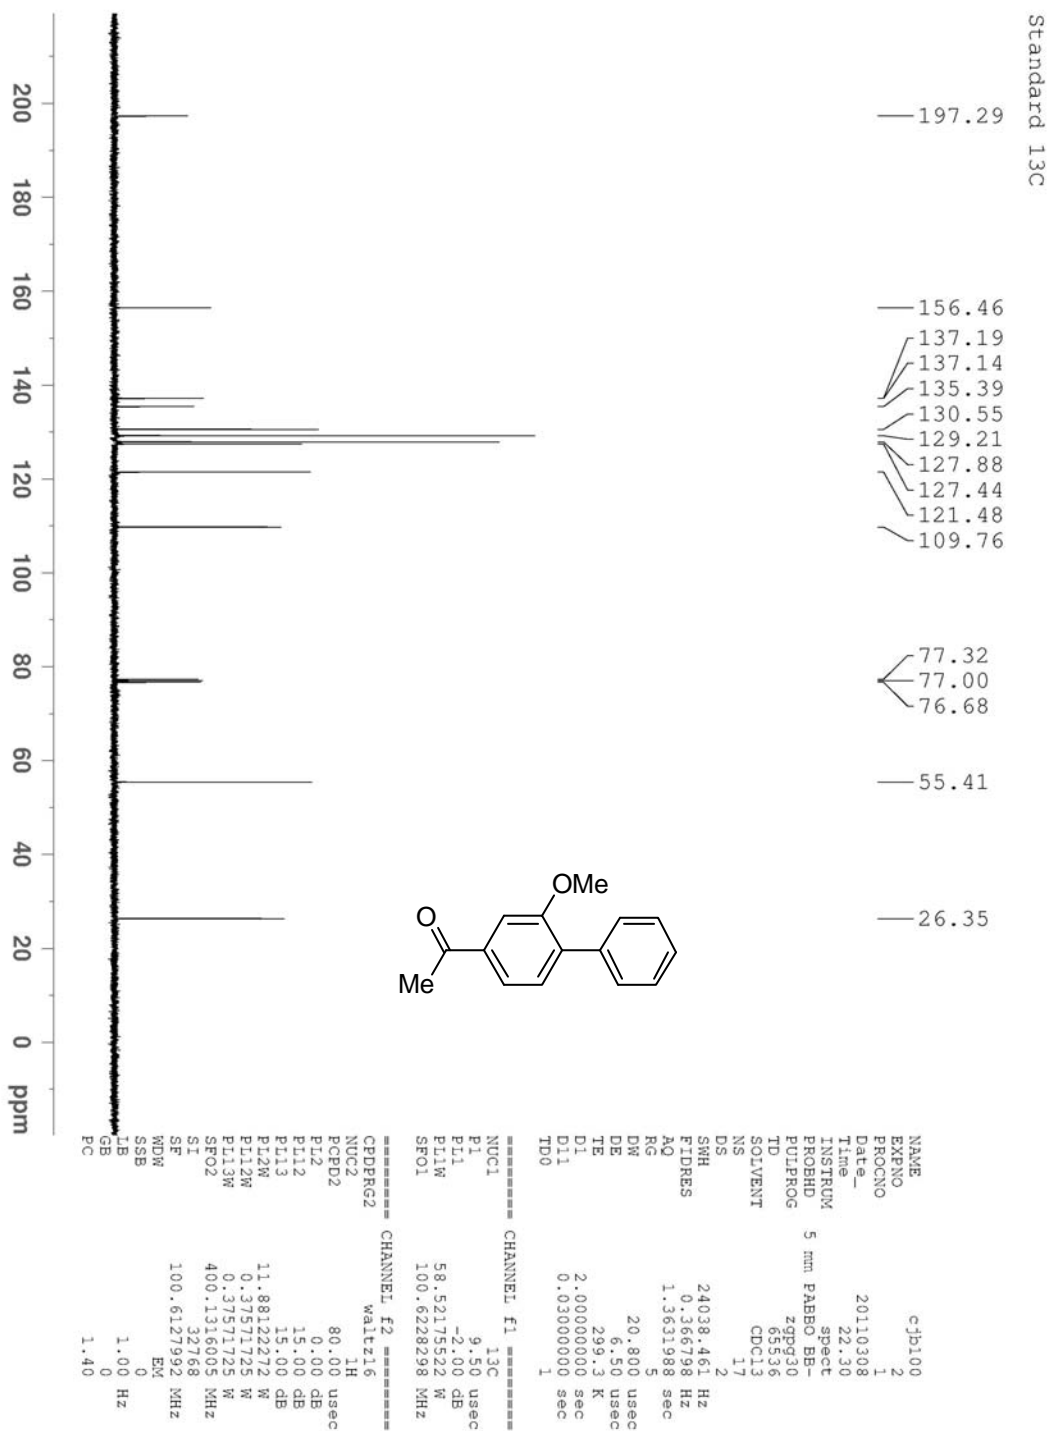

File : c:\msdchem\1\DATA\JIM\cjb100-crude.D  
Operator : Seam  
Acquired : 6 Mar 2011 00:29 using AcqMethod METHOD2.M  
Instrument : 5973N  
Sample Name :  
Misc Info :  
Vial Number: 6

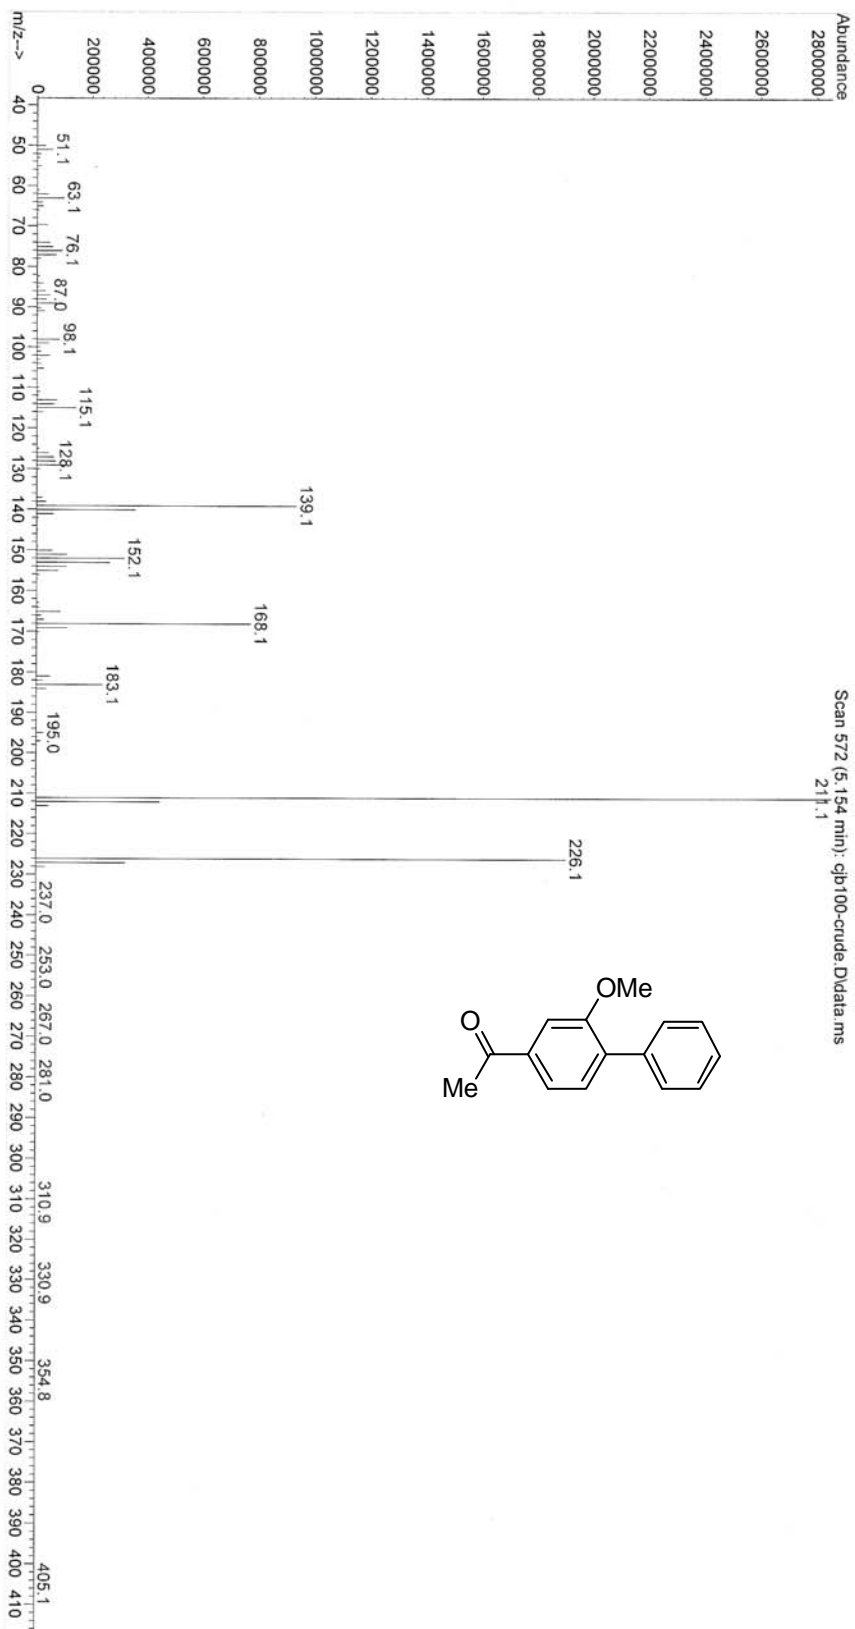

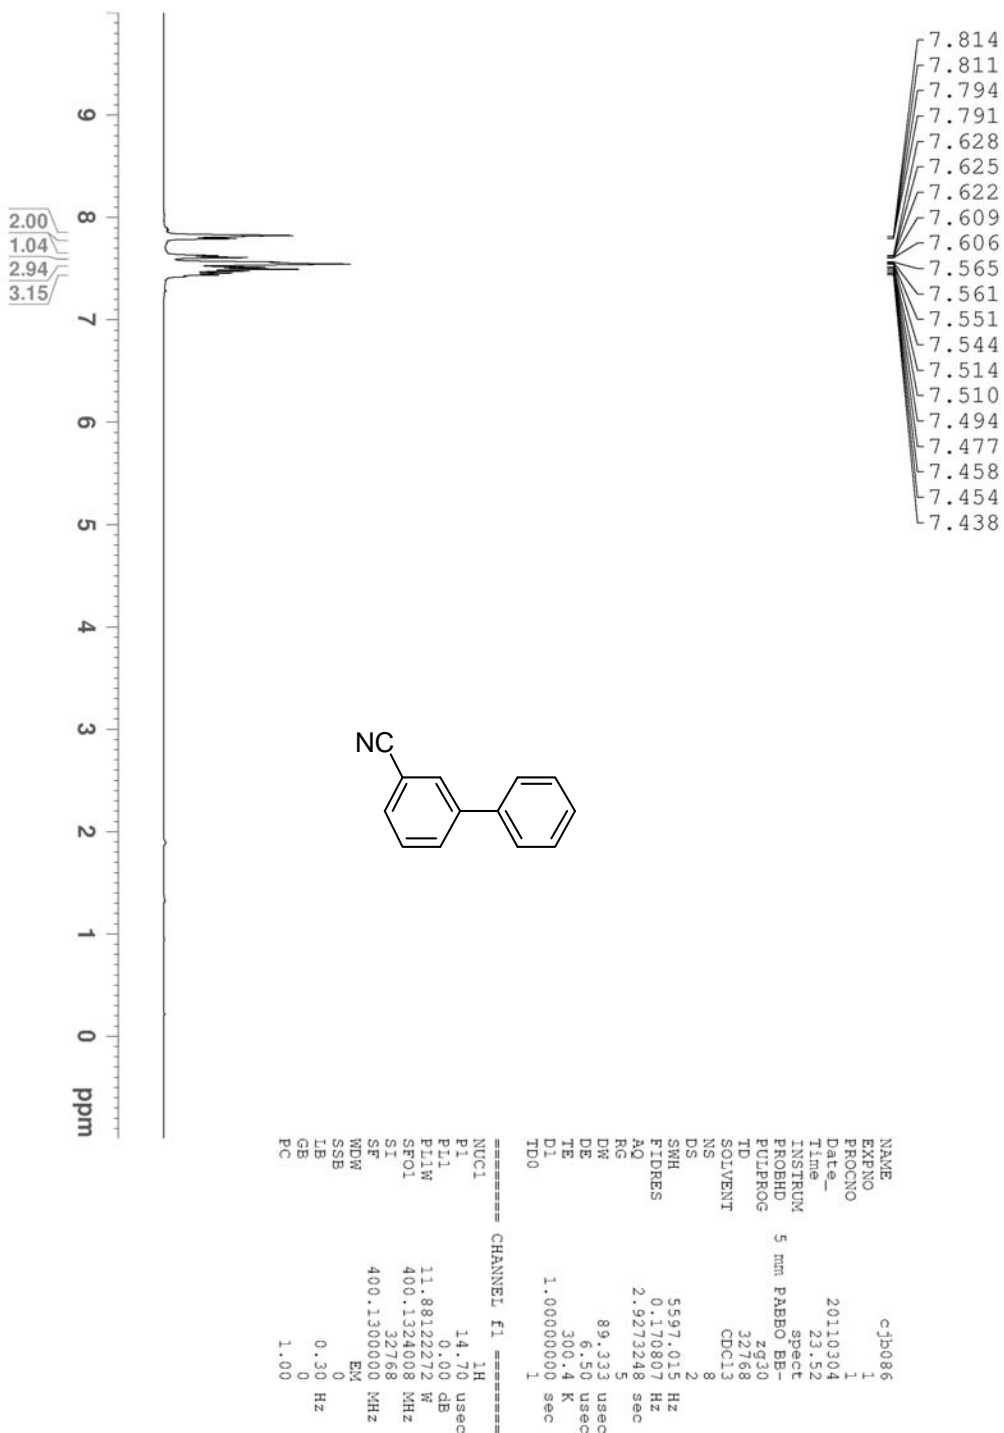

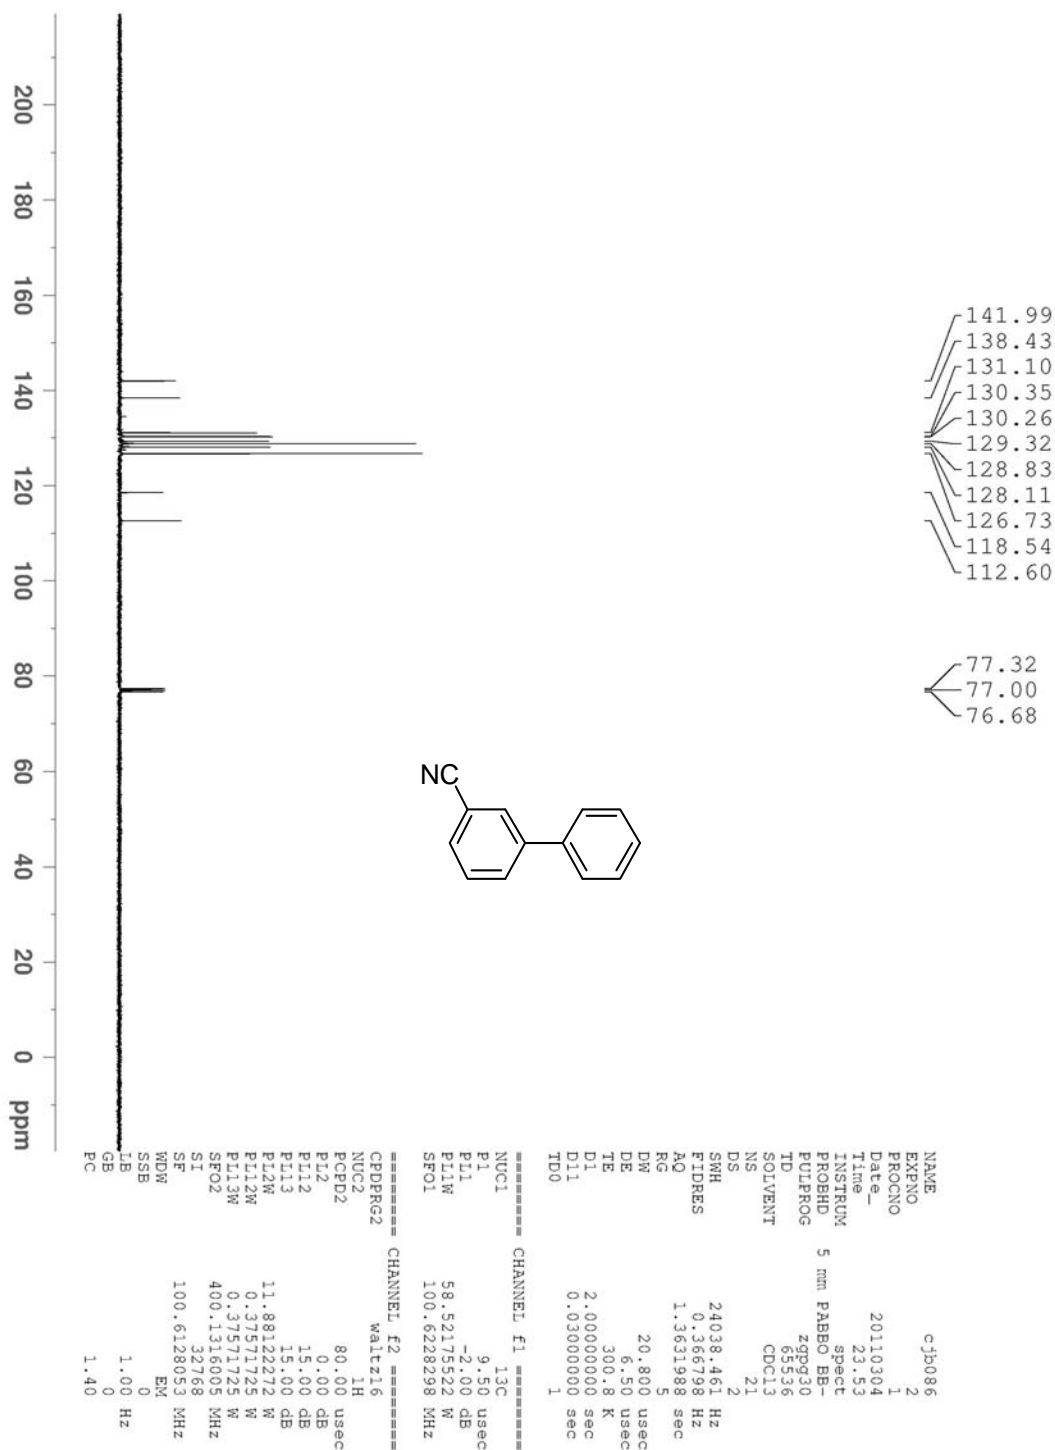



Supporting Information

File : C:\msdchem\1\DATA\cmsc\cjb86.D  
Operator : Seam  
Acquired : 4 Mar 2011 15:10 using AcqMethod METHOD2.M  
Instrument : 5973N  
Sample Name :  
Misc Info :  
Vial Number : 1

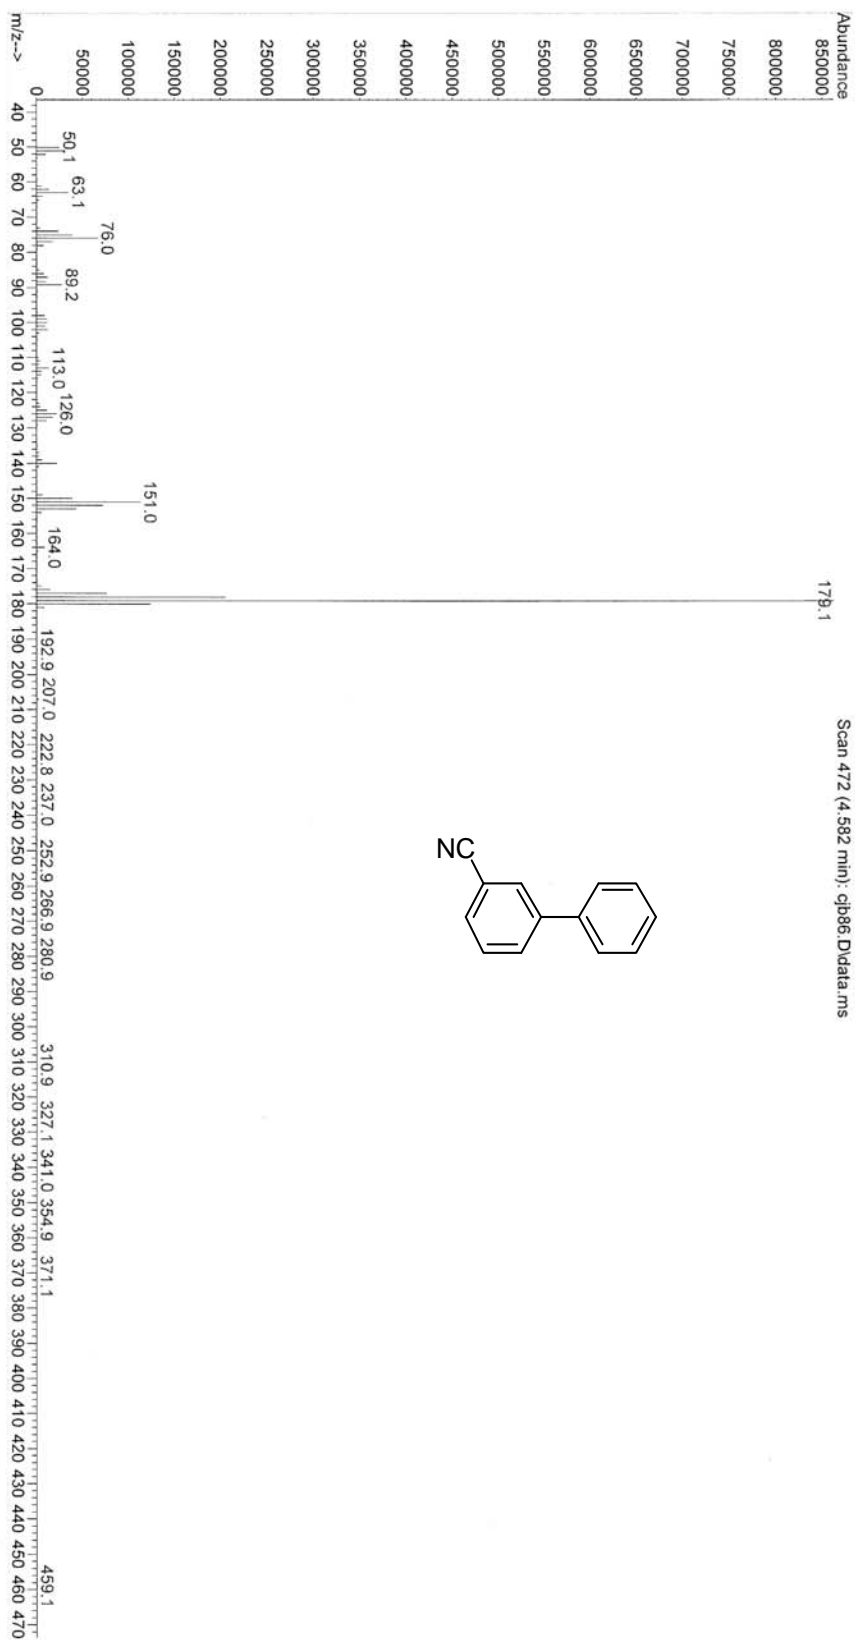

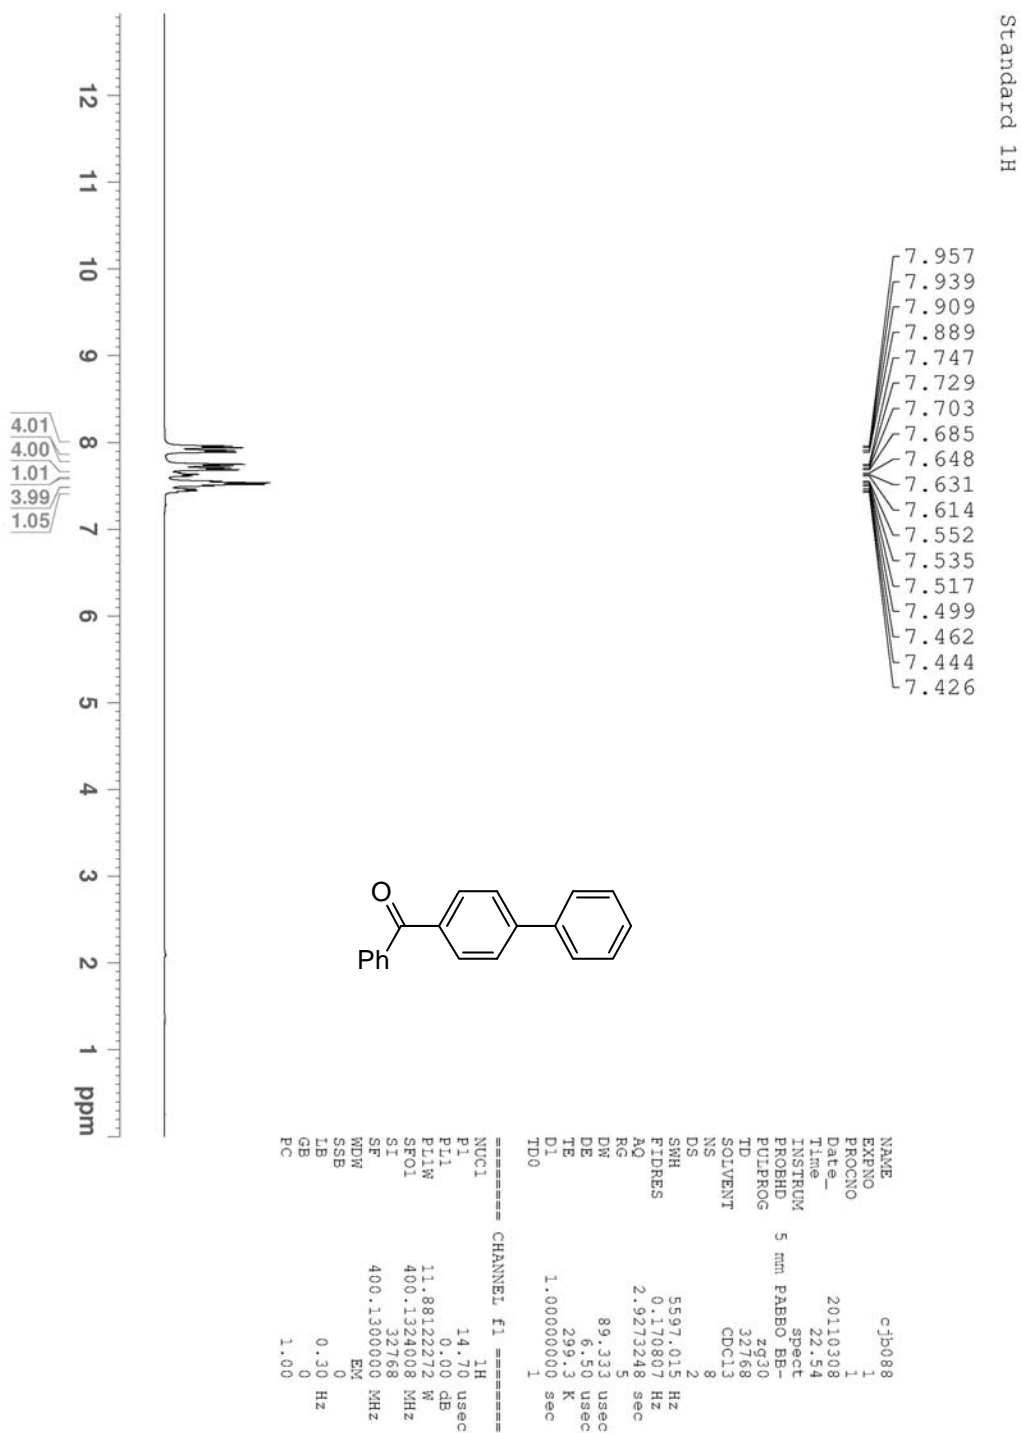

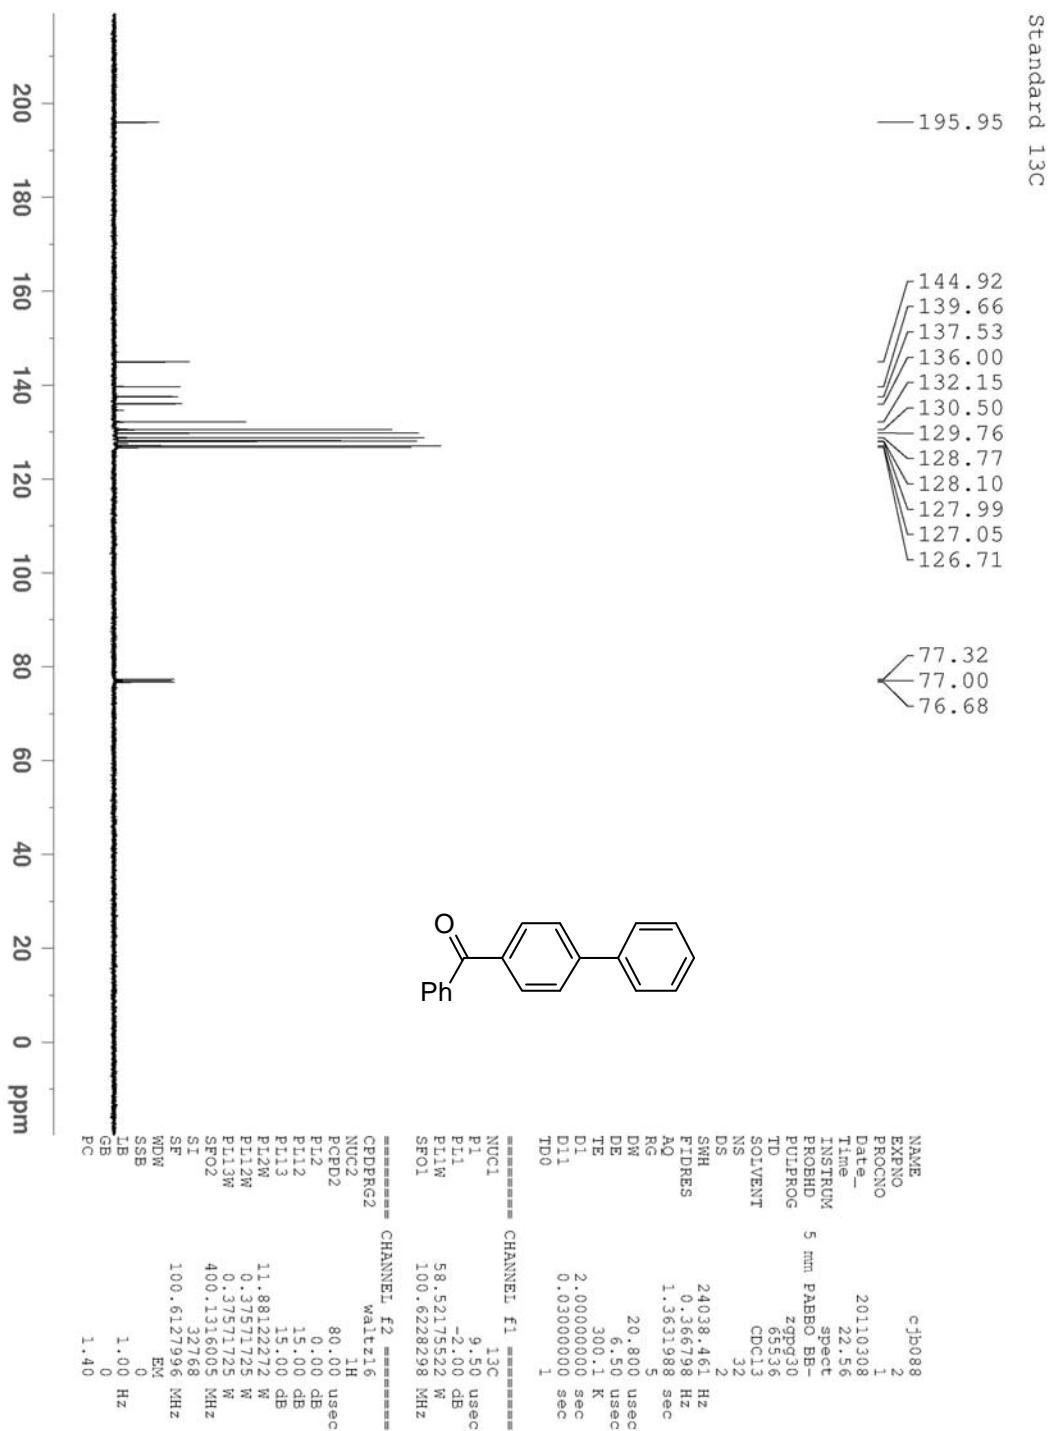

File : C:\msdchem\1\DATA\cmso\cjb88.D  
Operator : Seam  
Acquired : 4 Mar 2011 15:26 using AcqMethod METHOD2.M  
Instrument : 5973N  
Sample Name :  
Misc Info :  
Vial Number: 2

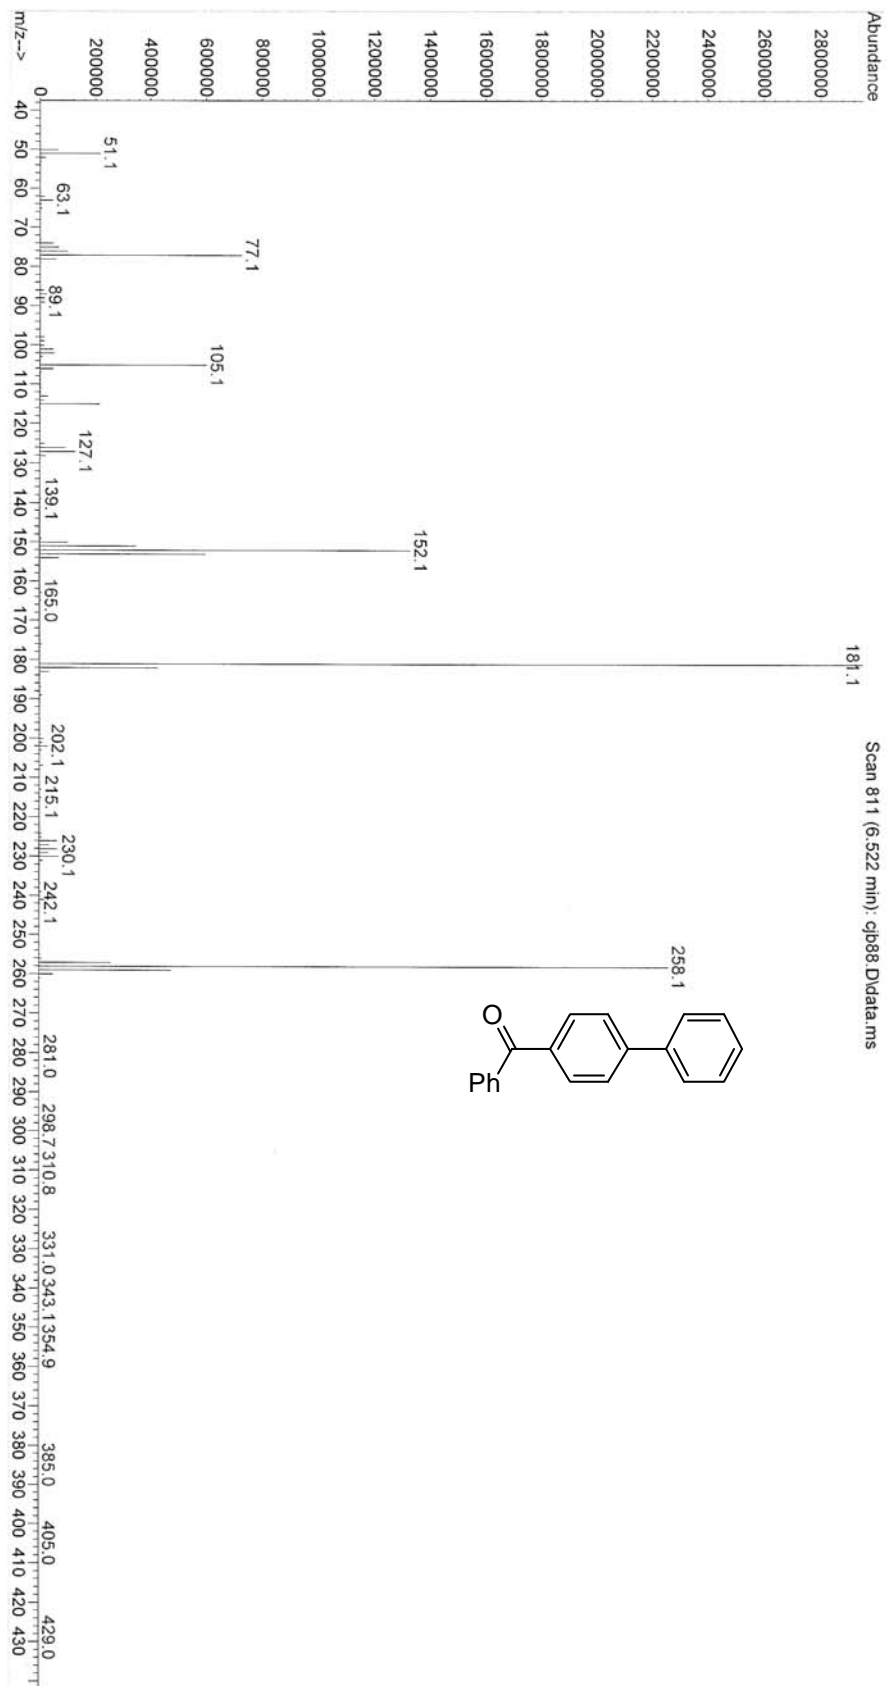

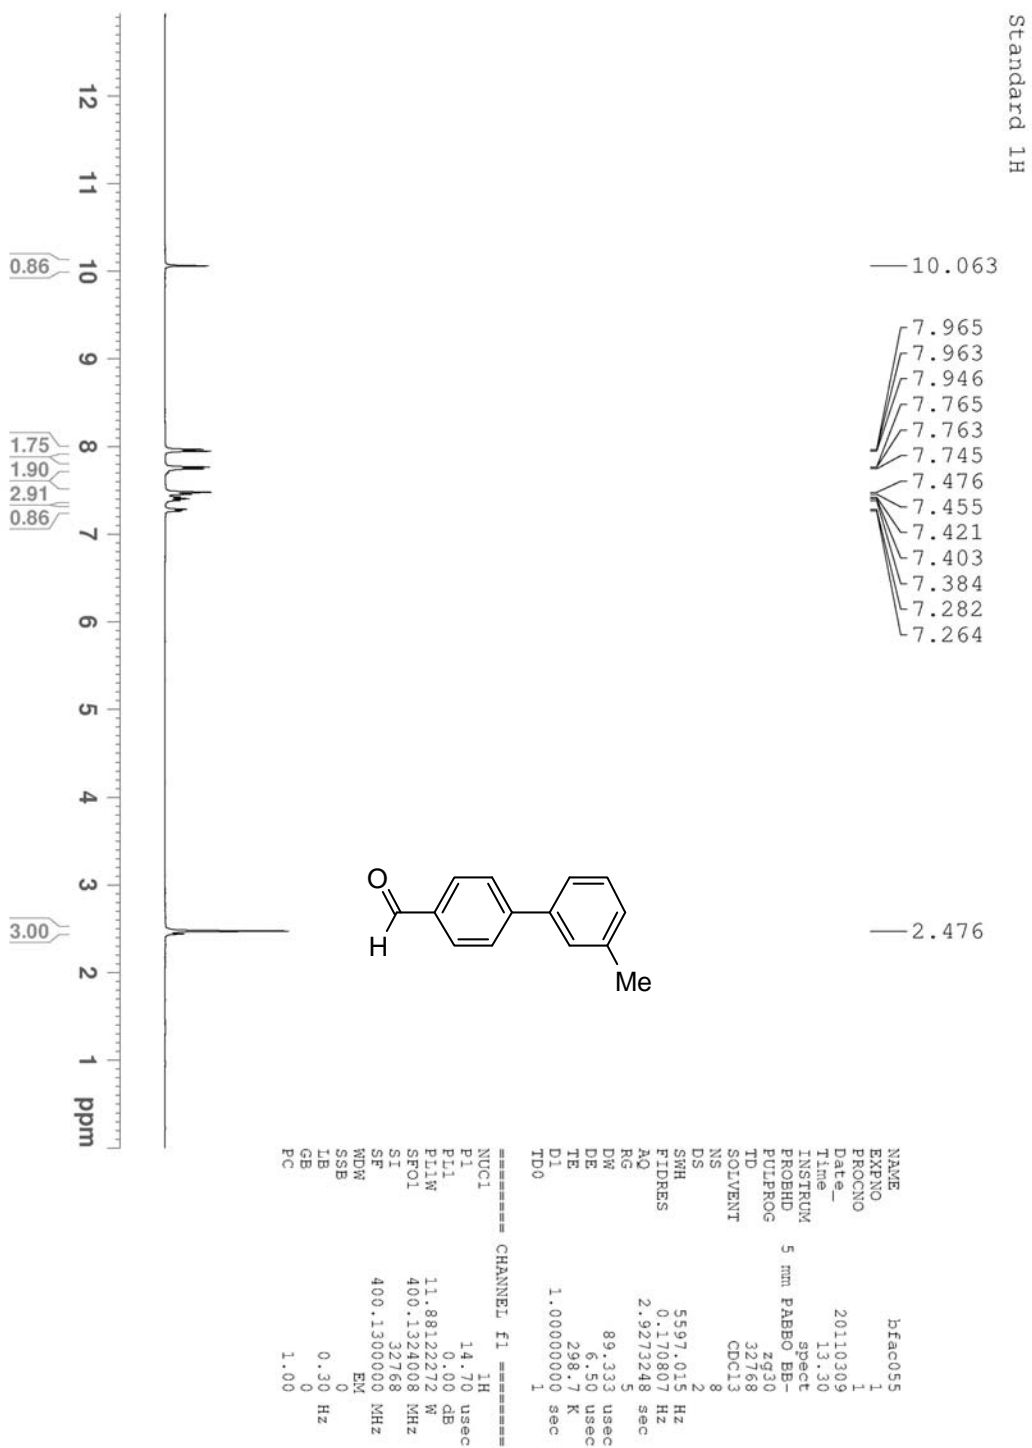

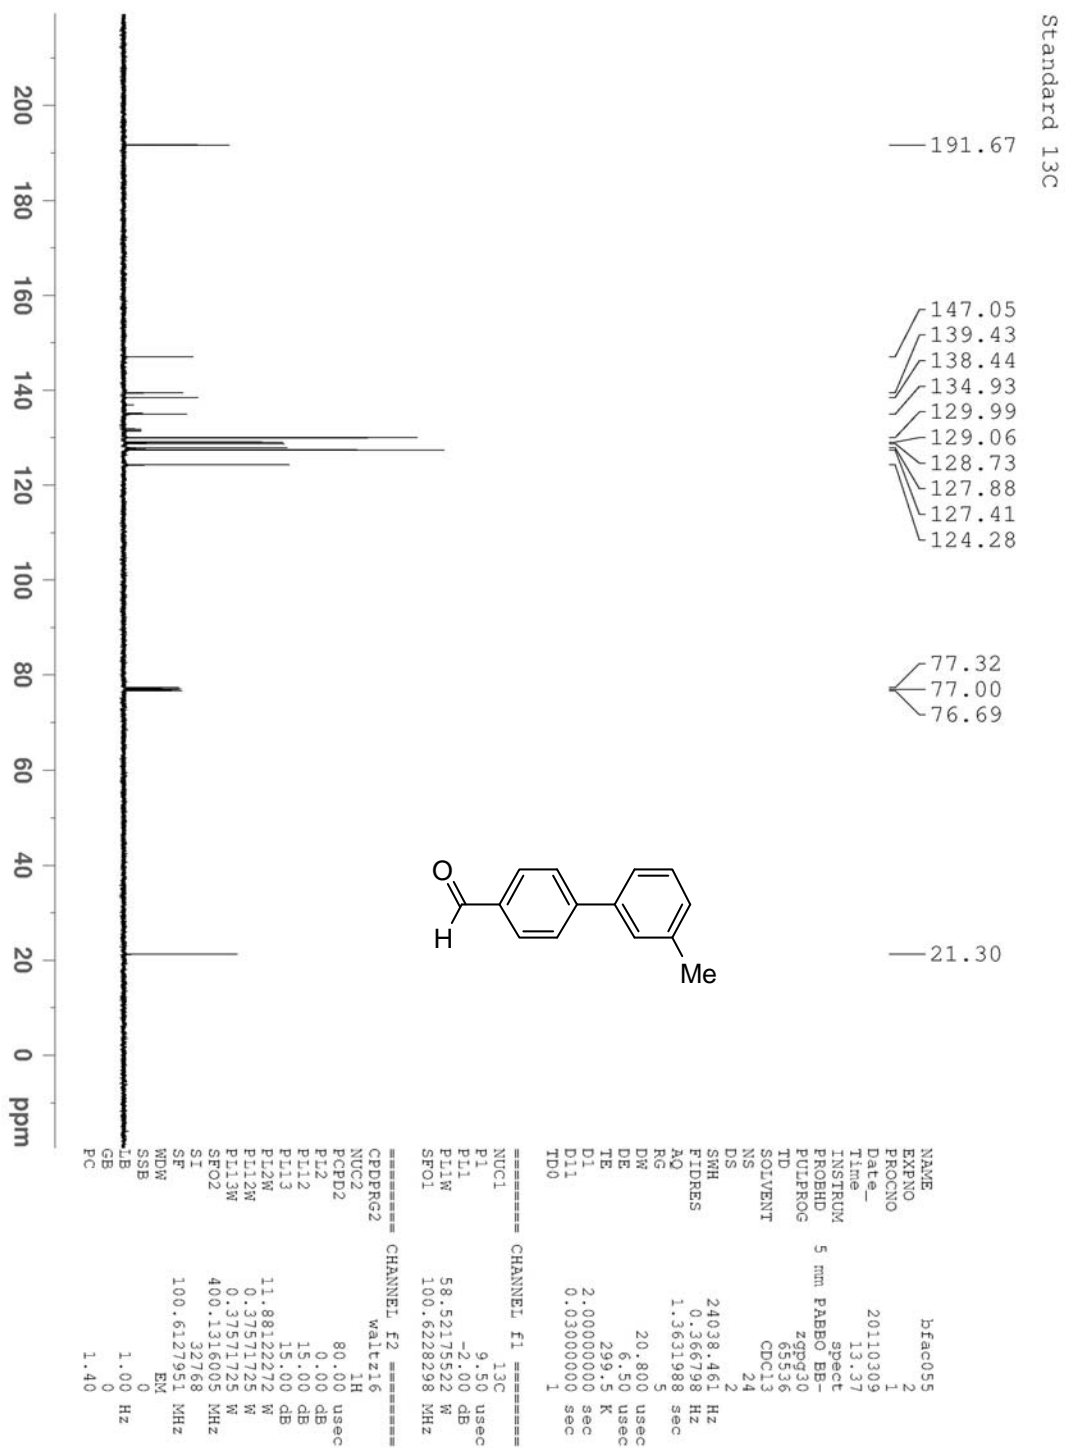

Supporting Information

File : C:\msdchem\1\DATA\chun\bfac55.D  
Operator : Seam  
Acquired : 8 Mar 2011 14:09 using AcqMethod JIM2.M  
Instrument : 5973N  
Sample Name :  
Misc Info :  
Vial Number: 8

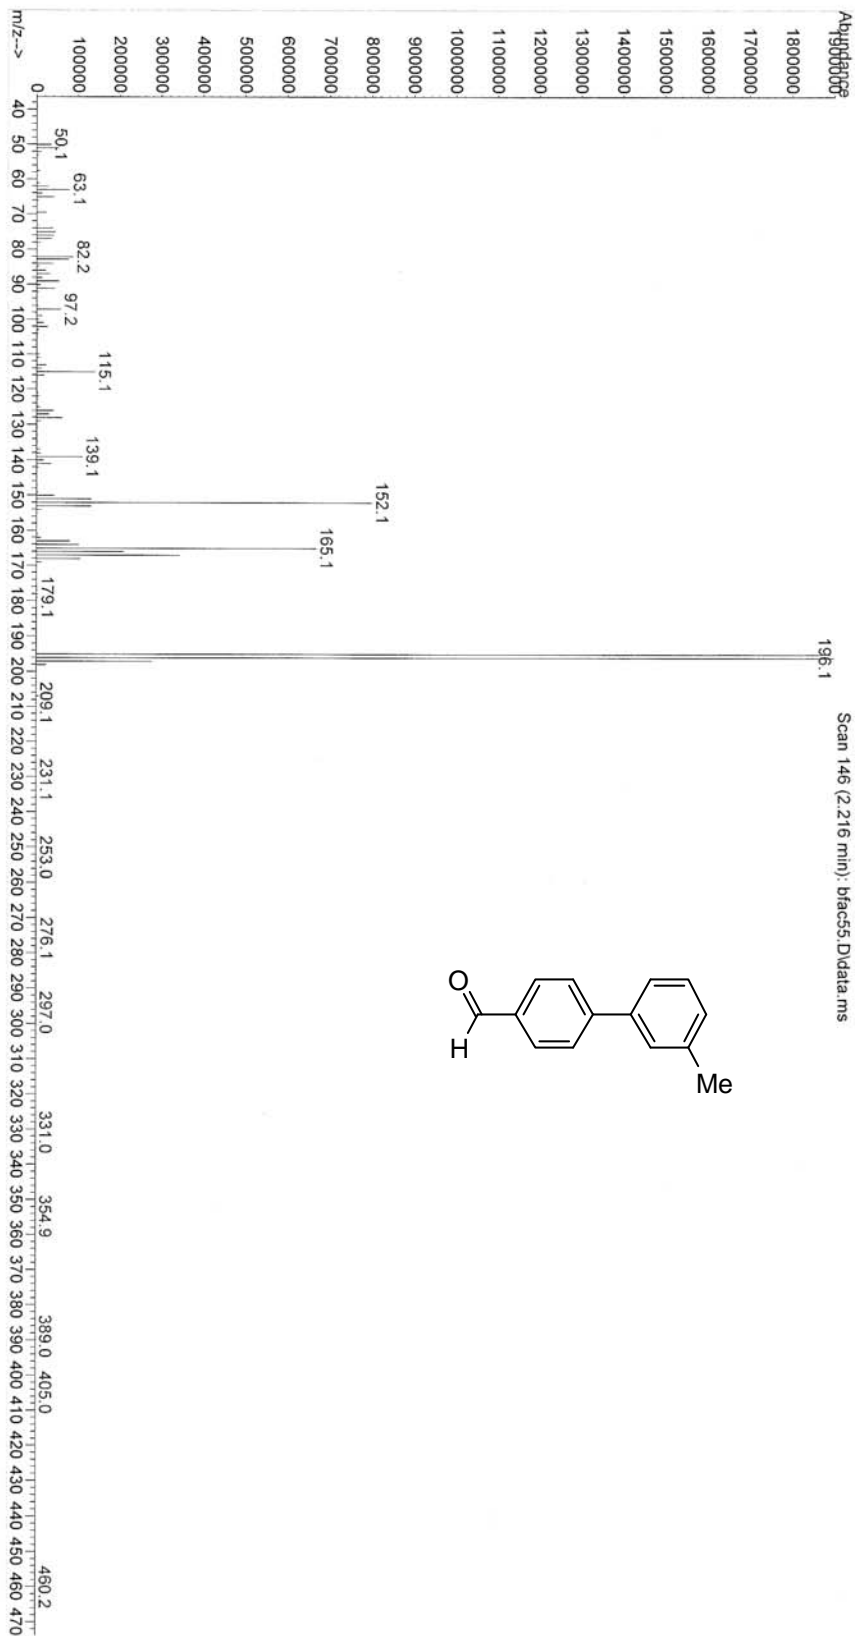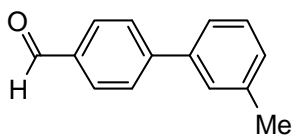

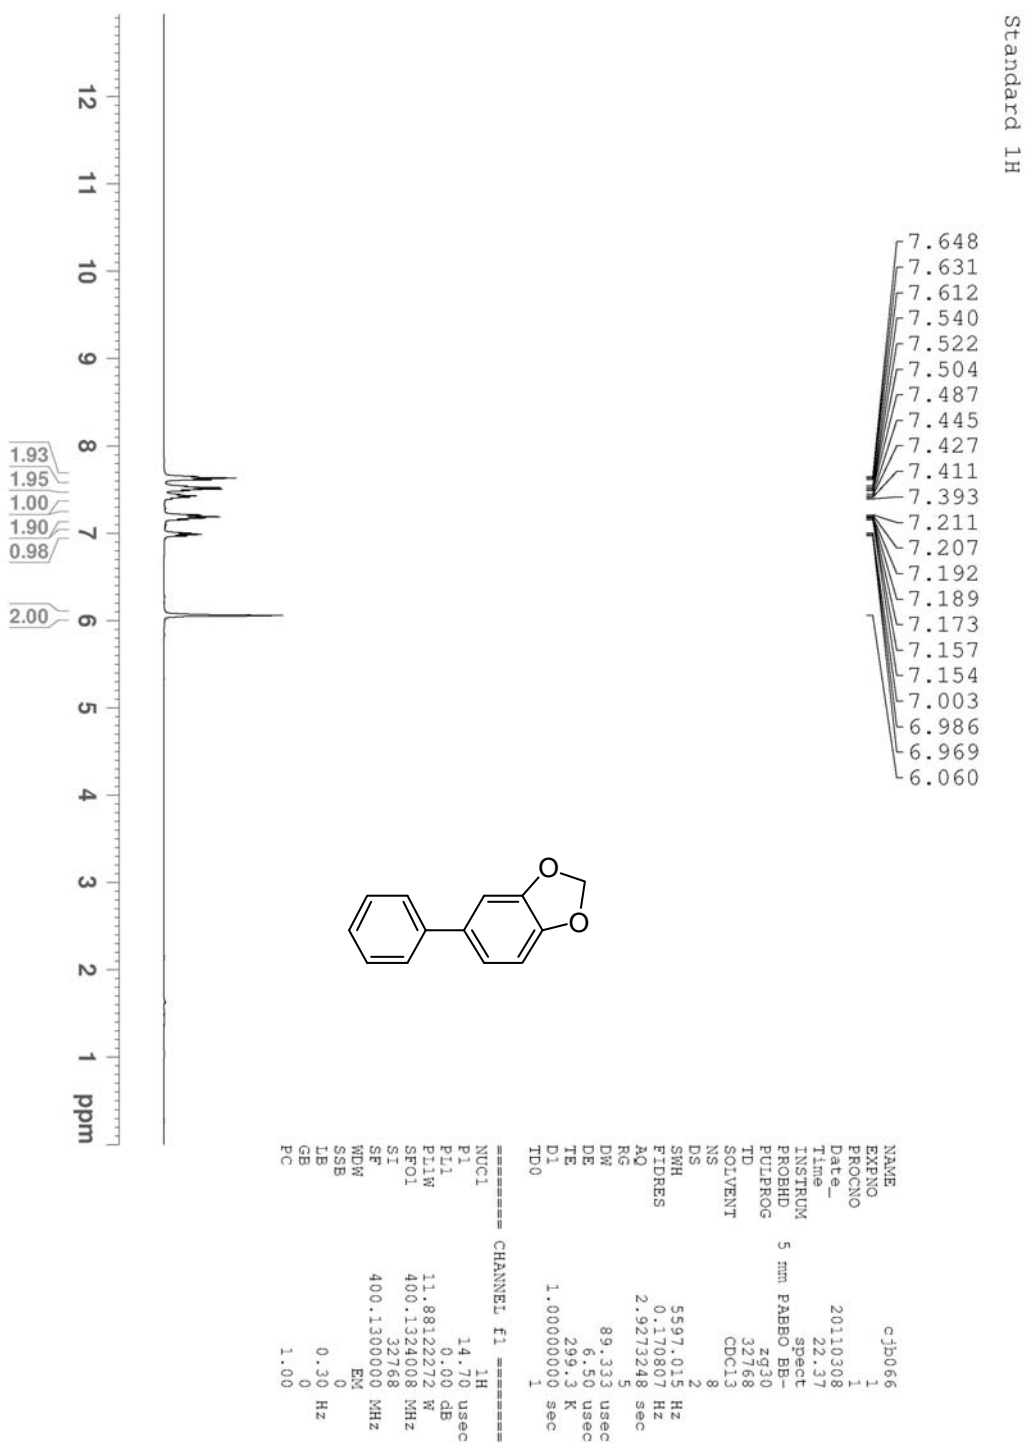



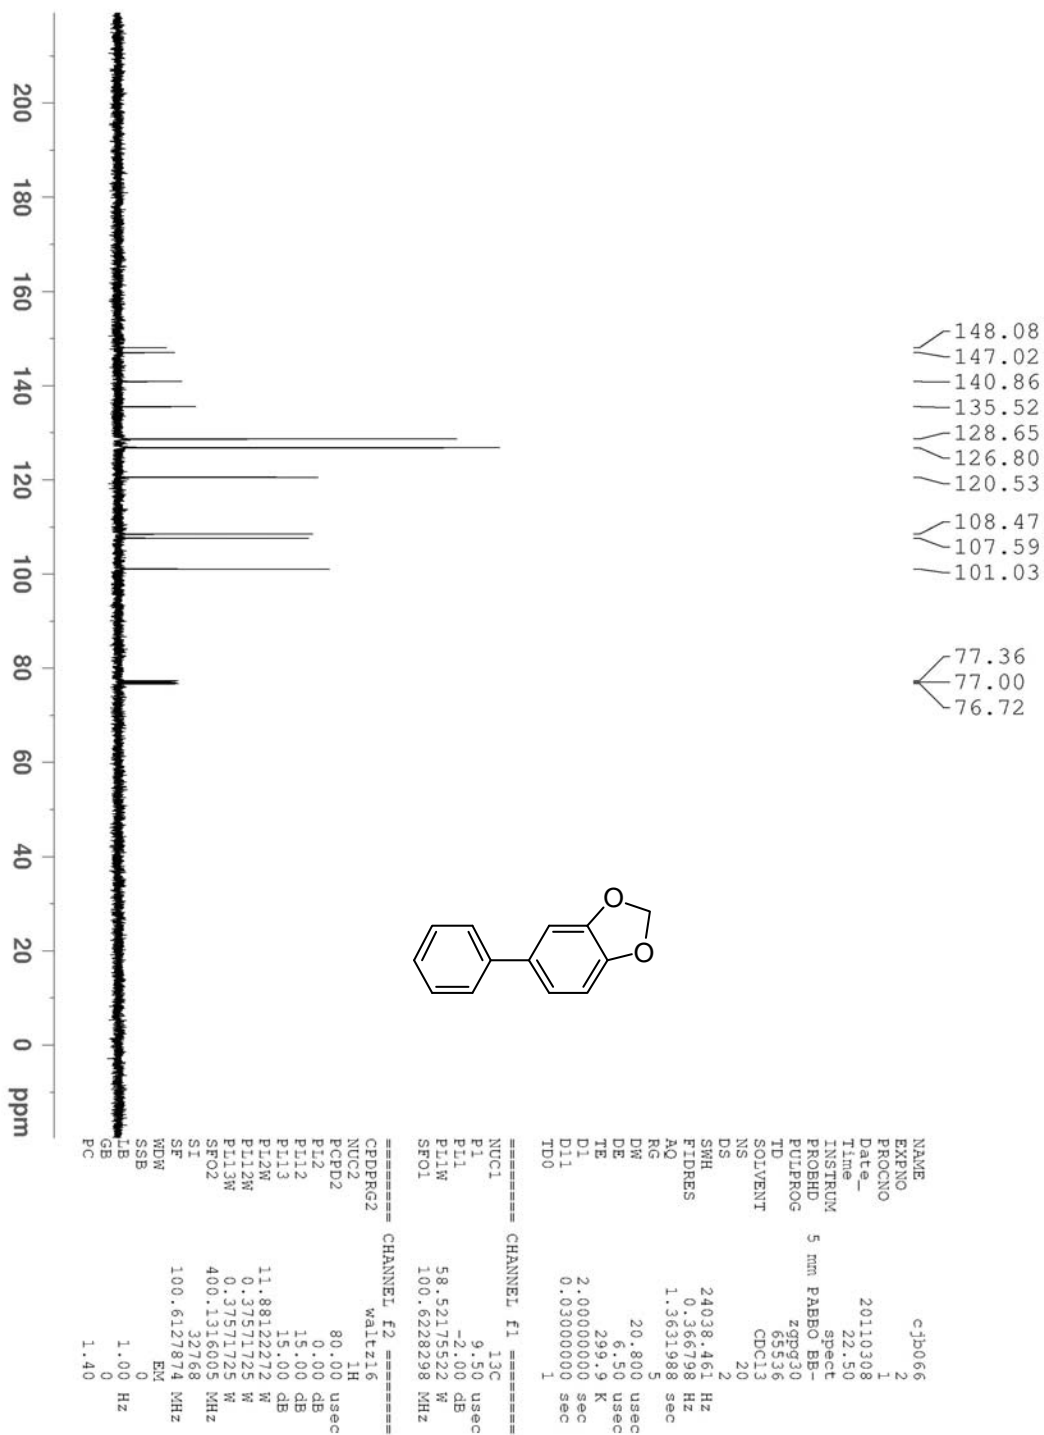

File : C:\msdchem\1\DATA\JIM\CJB066.D  
Operator : Seam  
Acquired : 26 Feb 2011 00:25 using AcqMethod METHOD2.M  
Instrument : 5973N  
Sample Name :  
Misc Info :  
Vial Number : 4

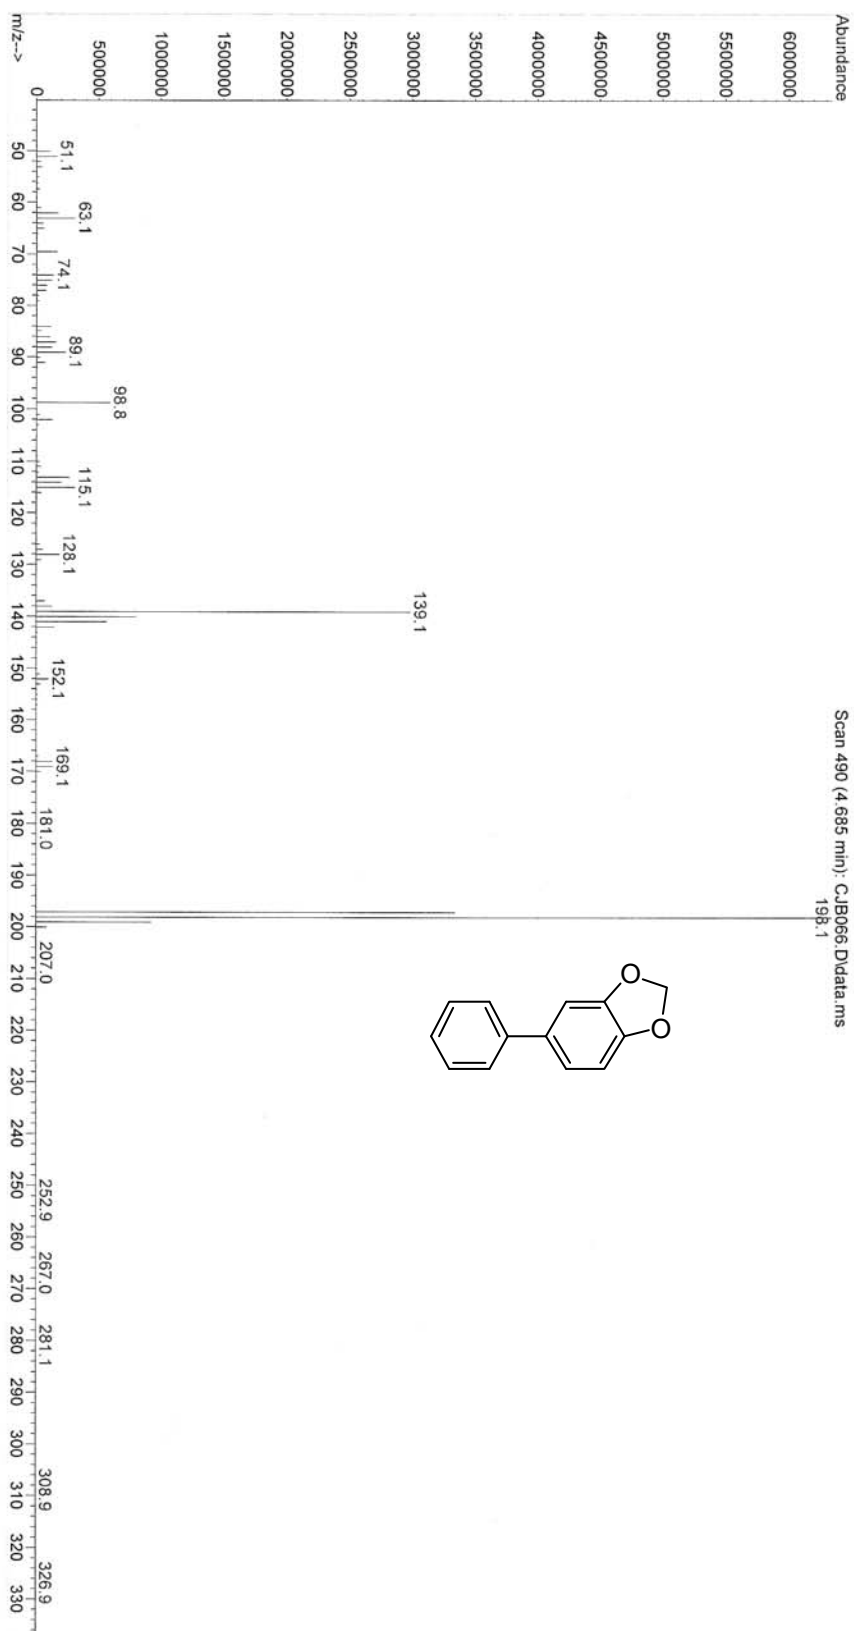

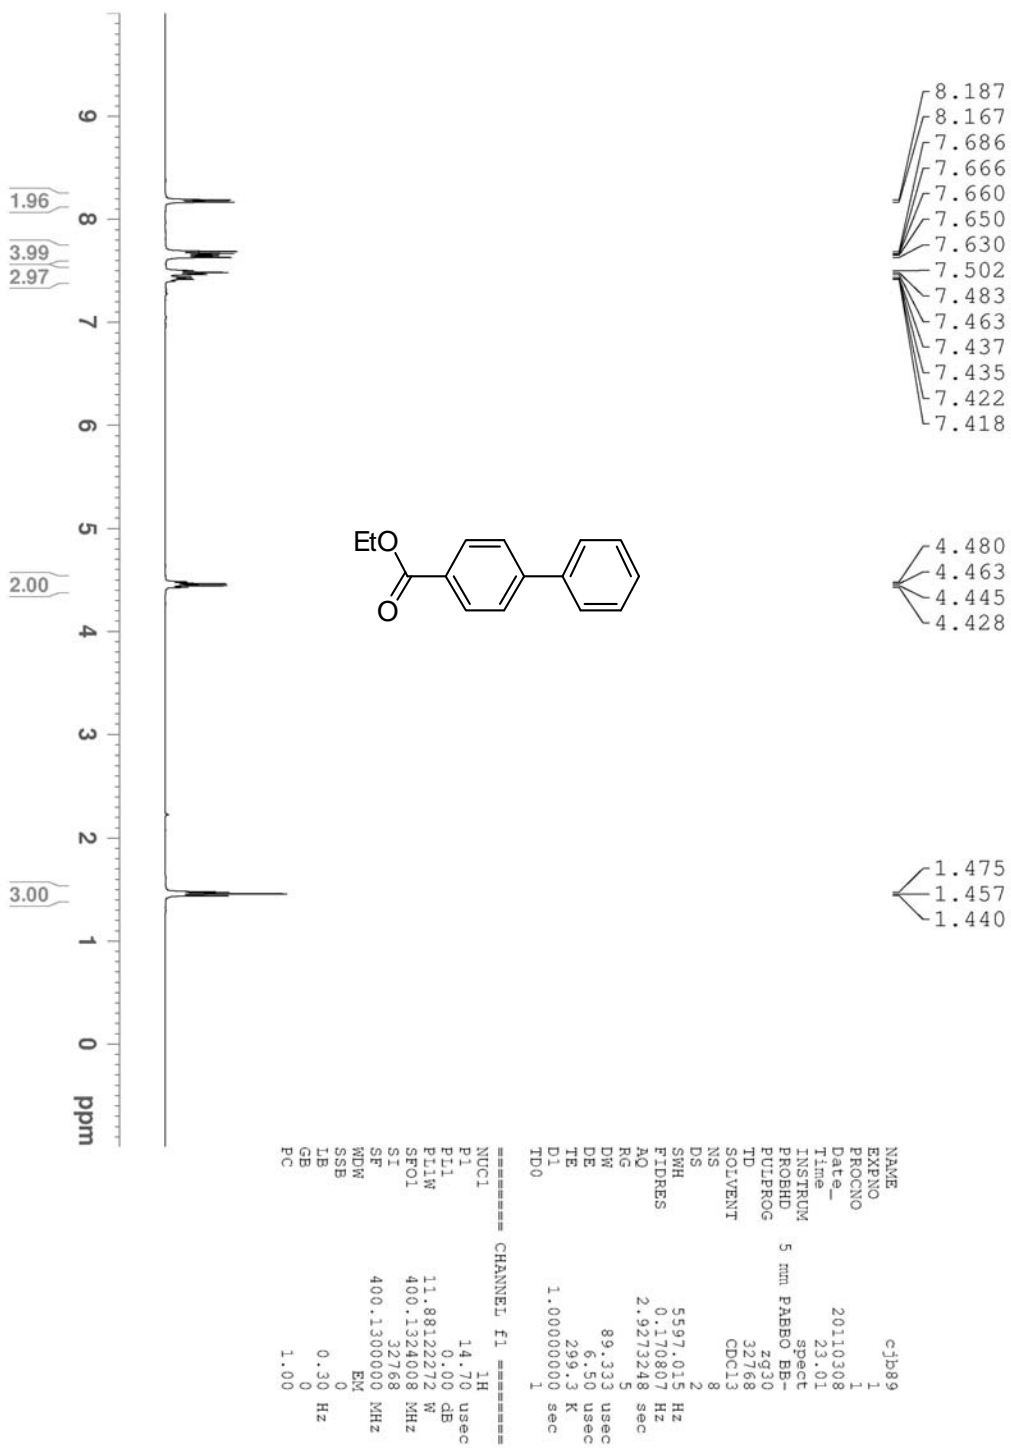

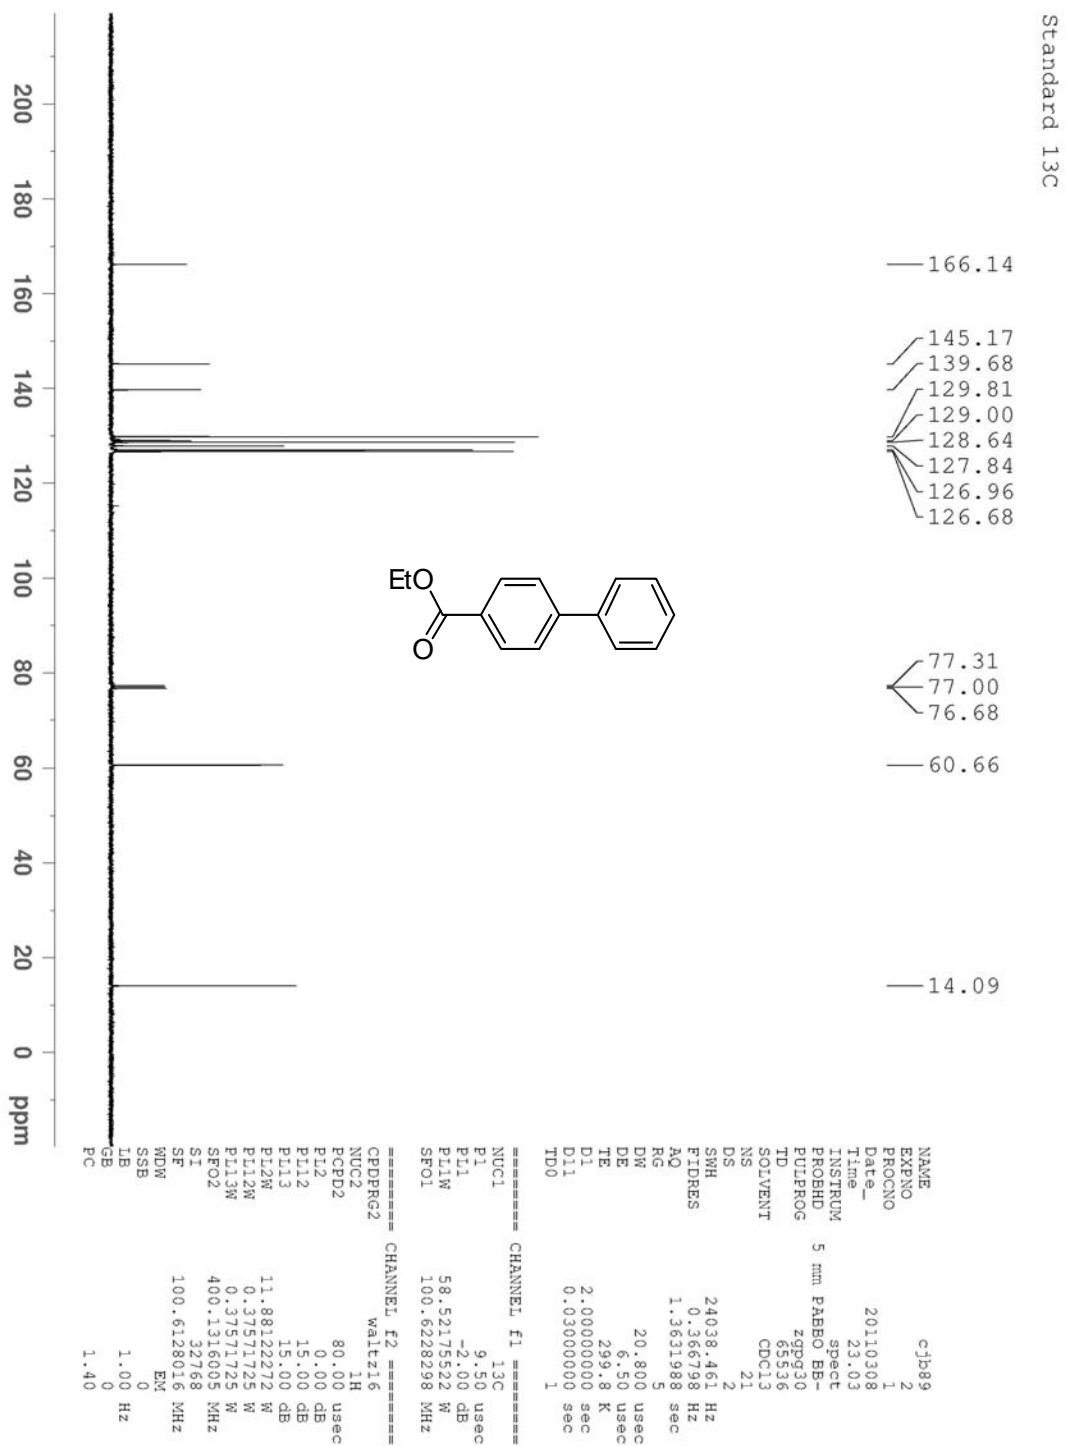

File : C:\msdchem\1\DATA\cmsc\cjb89.D  
Operator : Seam  
Acquired : 4 Mar 2011 15:41 using AcqMethod METHOD2.M  
Instrument : 5973N  
Sample Name :  
Misc Info :  
Vial Number: 3

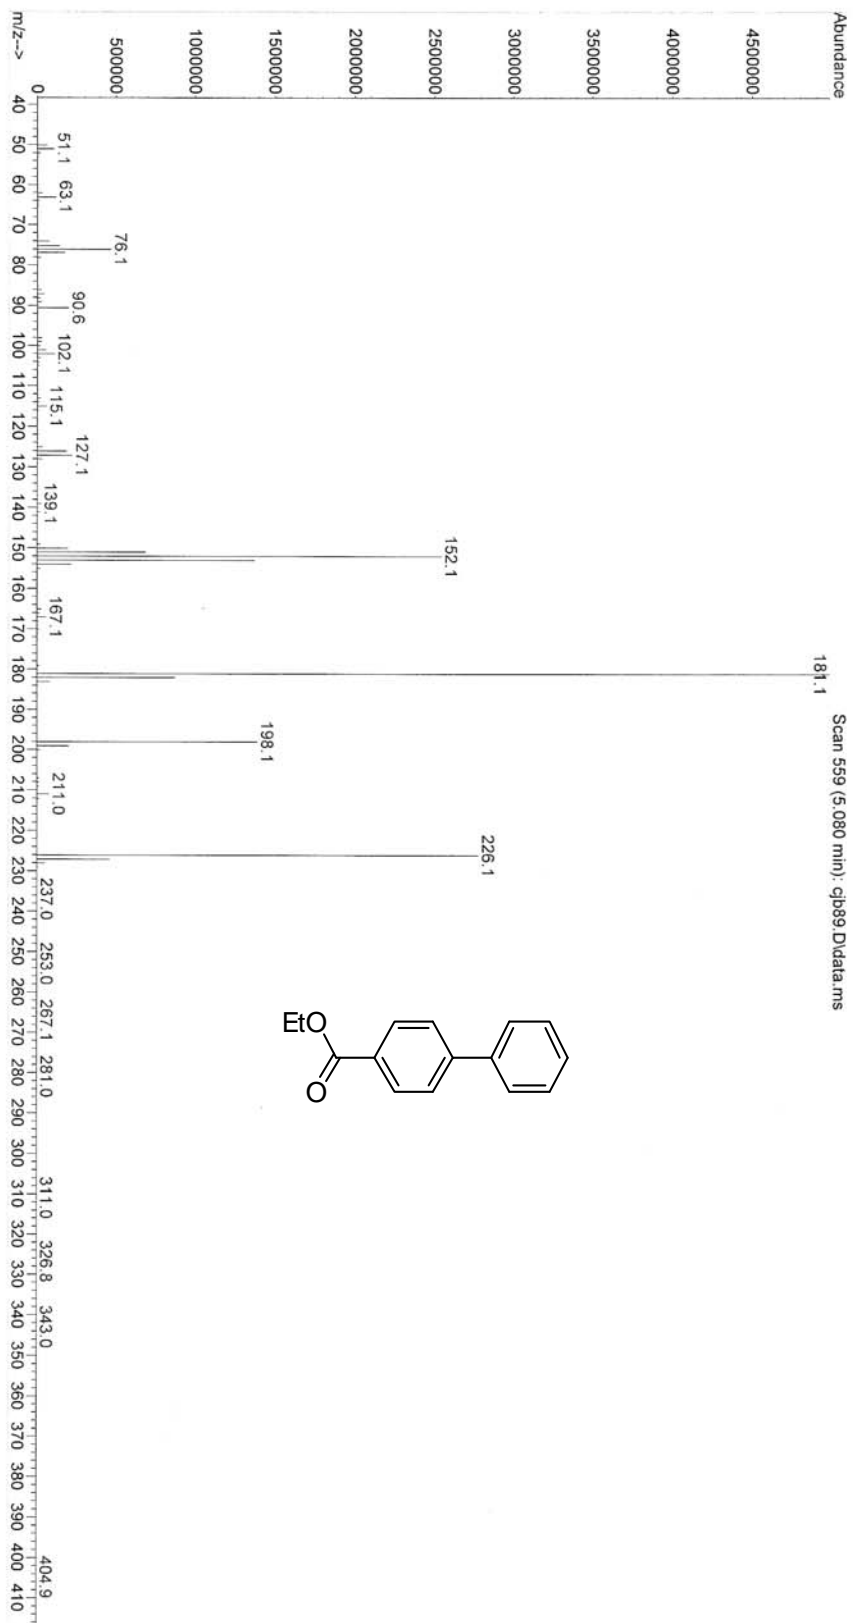

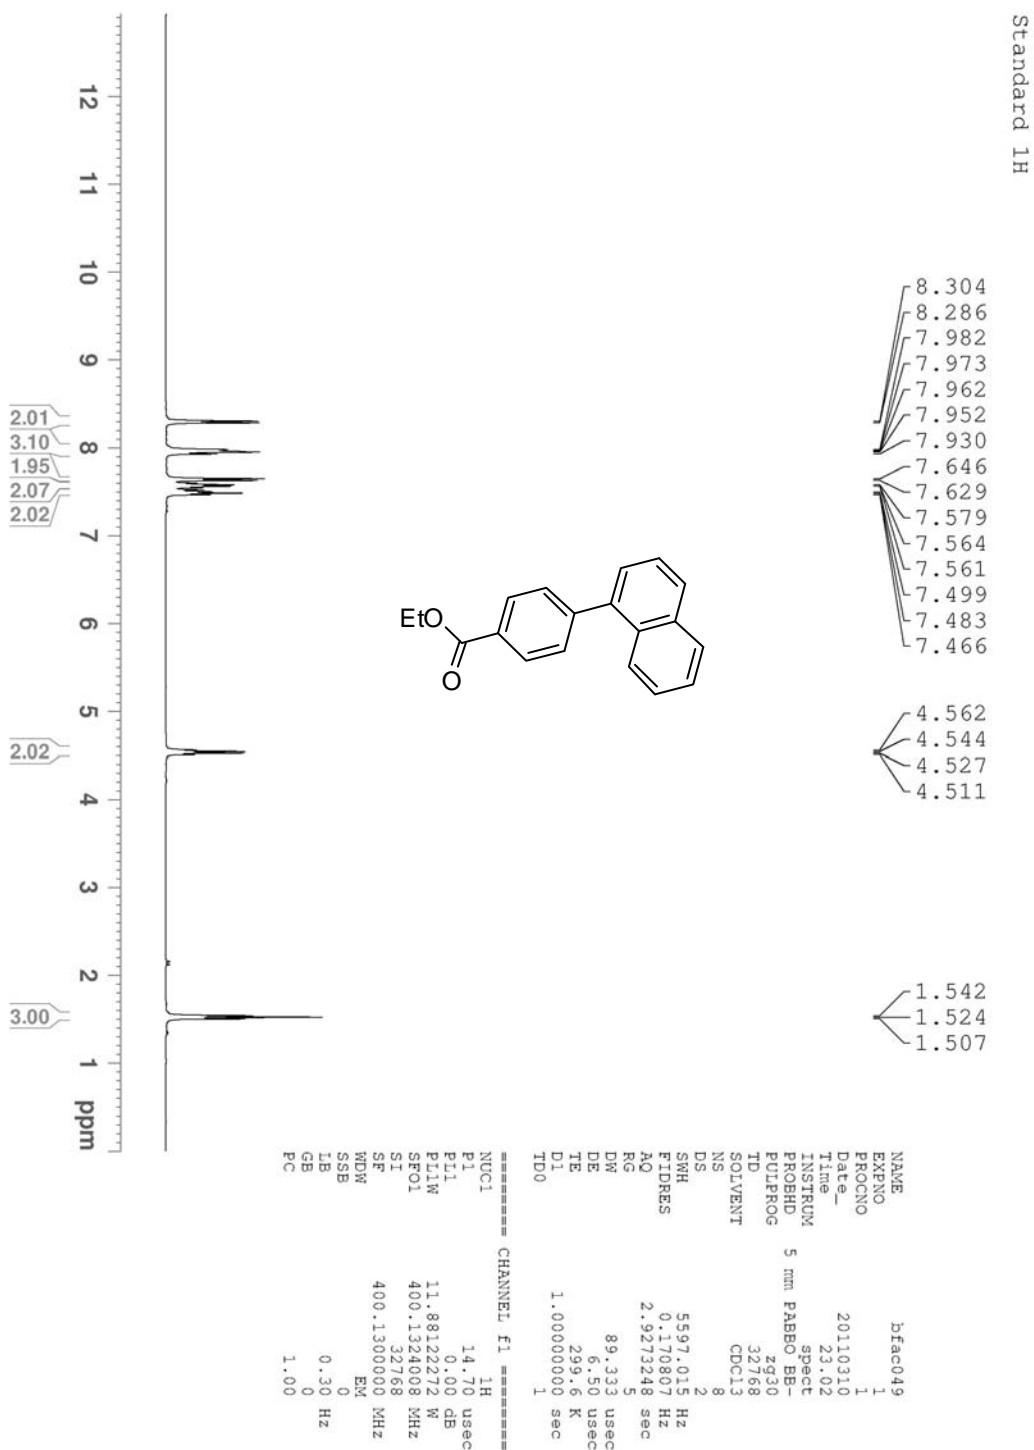

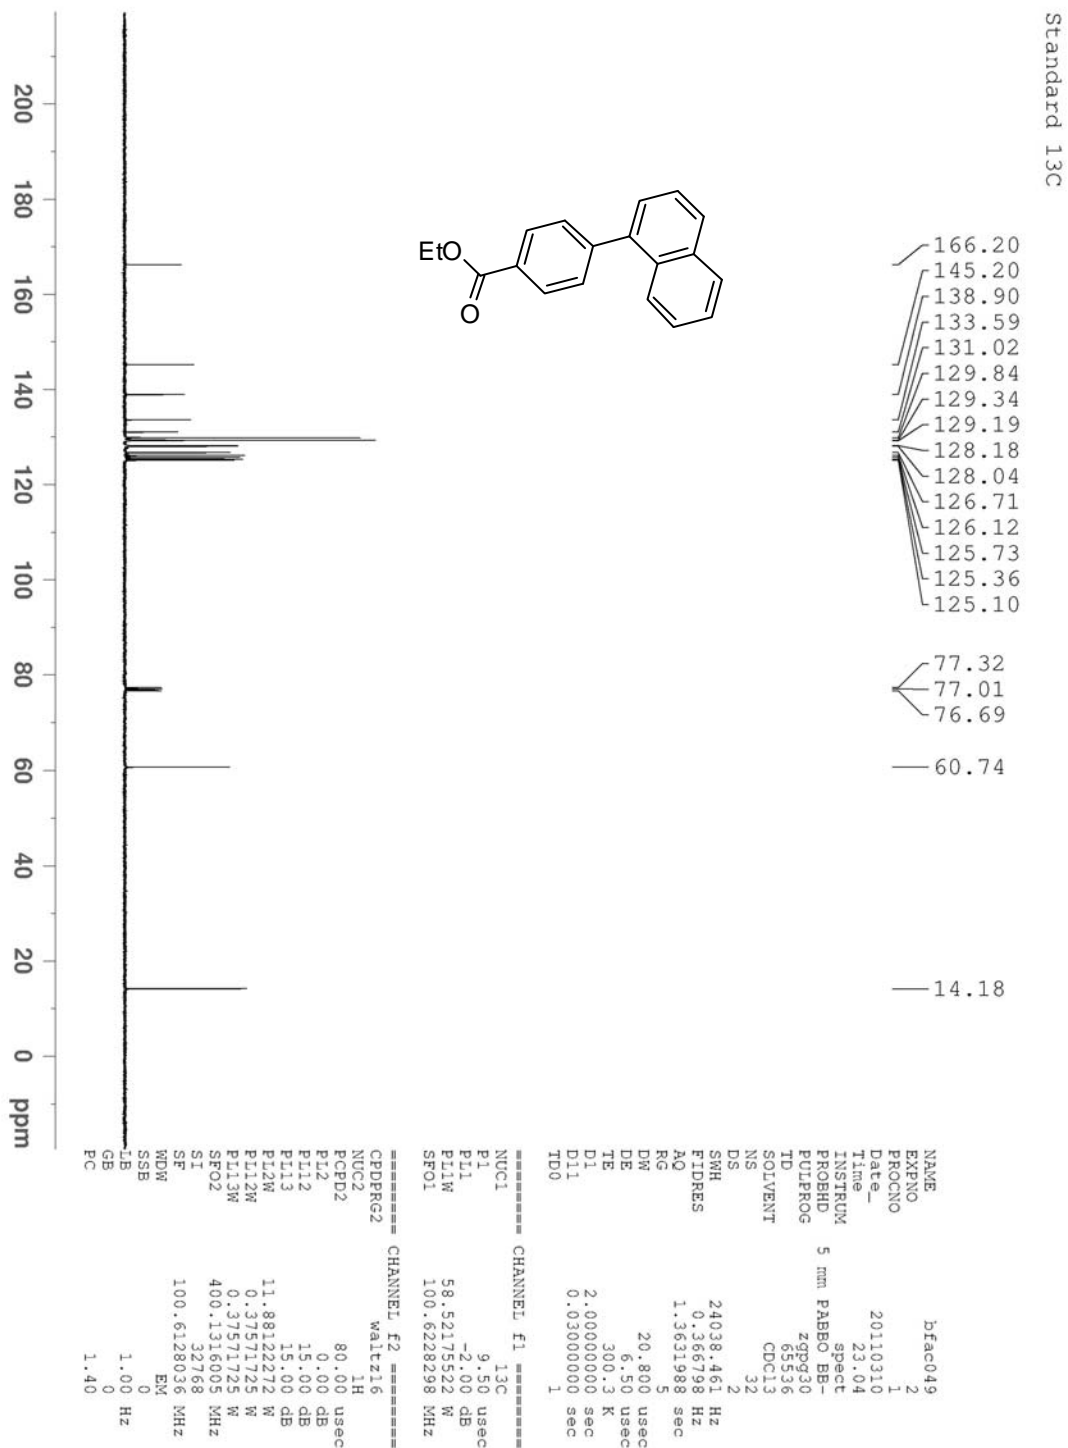

Supporting Information

File : c:\msdchem\1\DATA\chun\bfac49.D  
Operator : Seam  
Acquired : 8 Mar 2011 14:03 using AcqMethod JIM2.M  
Instrument : 5973N  
Sample Name :  
Misc Info :  
Vial Number: 7

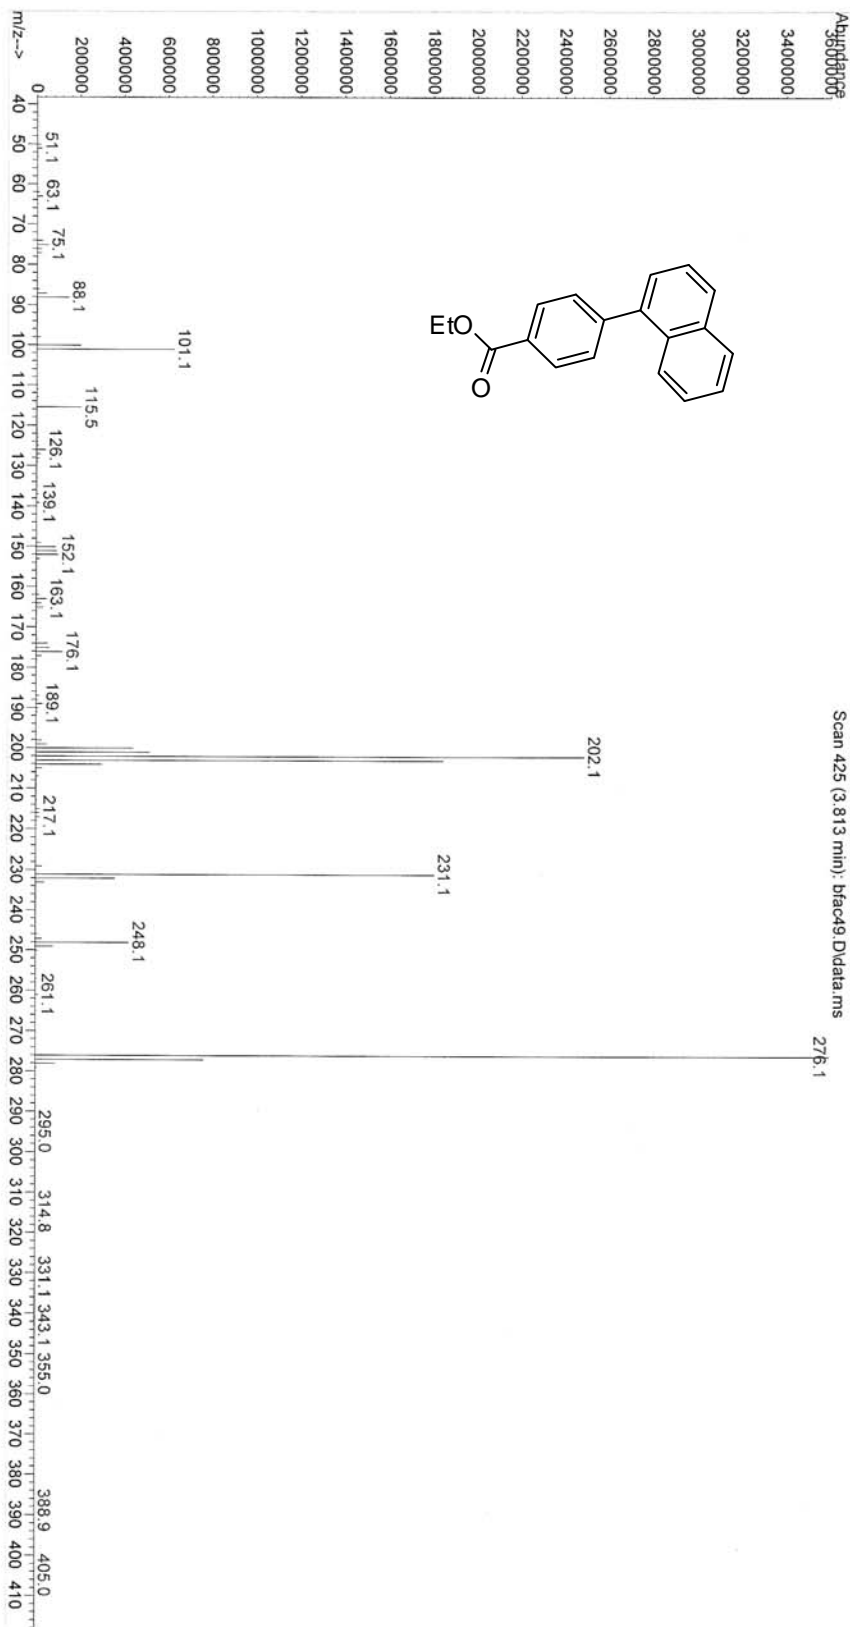



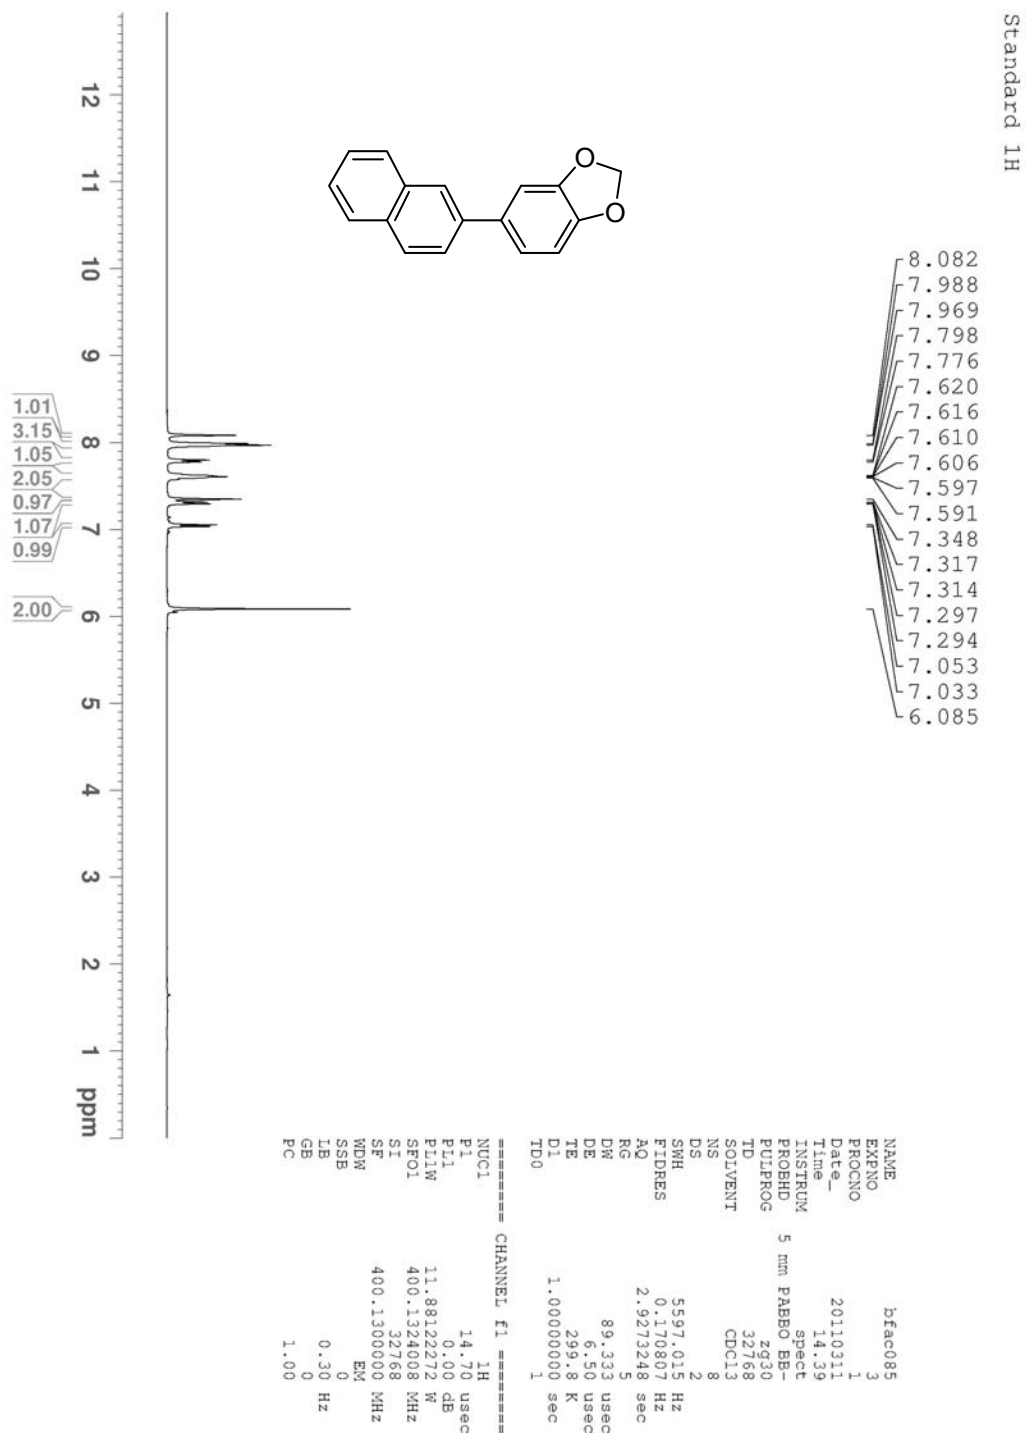

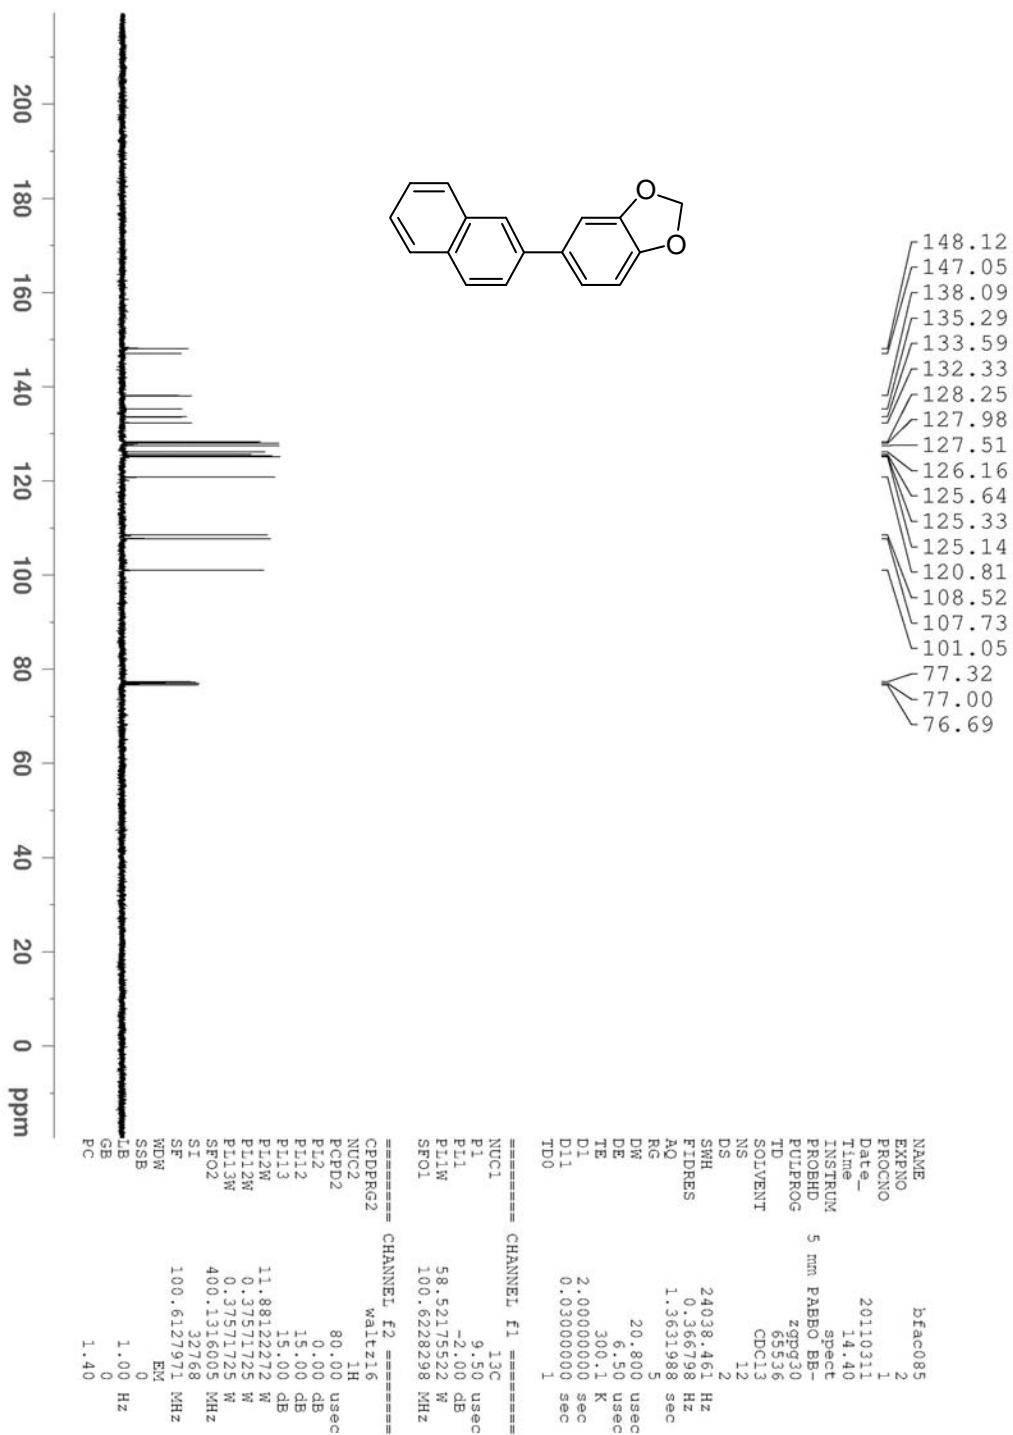

Supporting Information

File : C:\msdchem\1\DATA\cms0\BFAC35.D  
Operator : Seam  
Acquired : 10 Mar 2011 19:44 using AcqMethod JIM2.M  
Instrument : 5973N  
Sample Name :  
Misc Info :  
Vial Number: 6

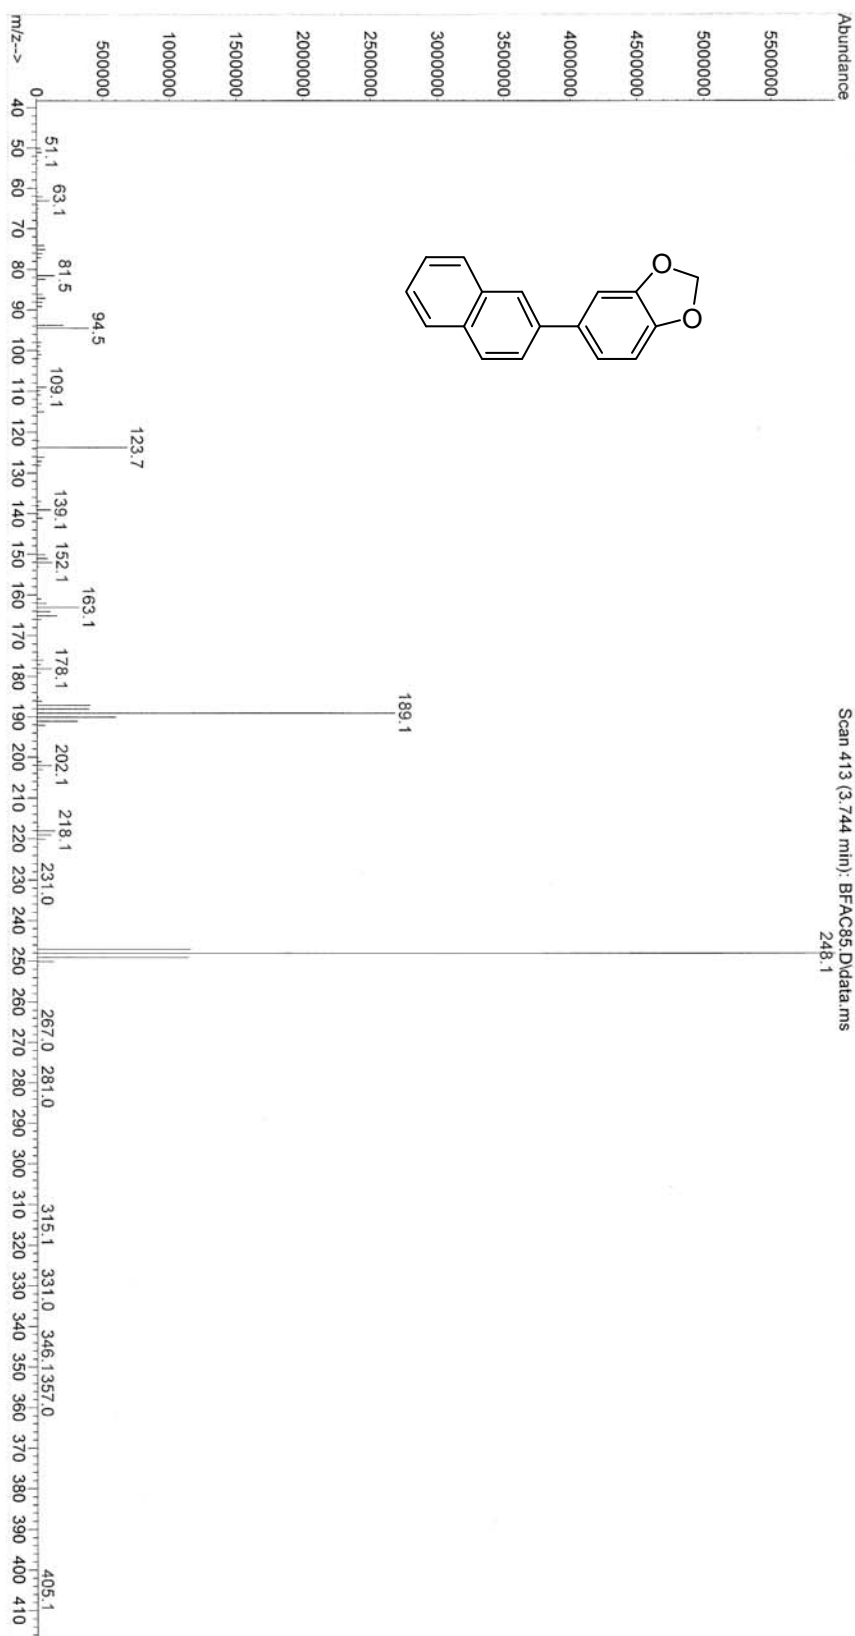

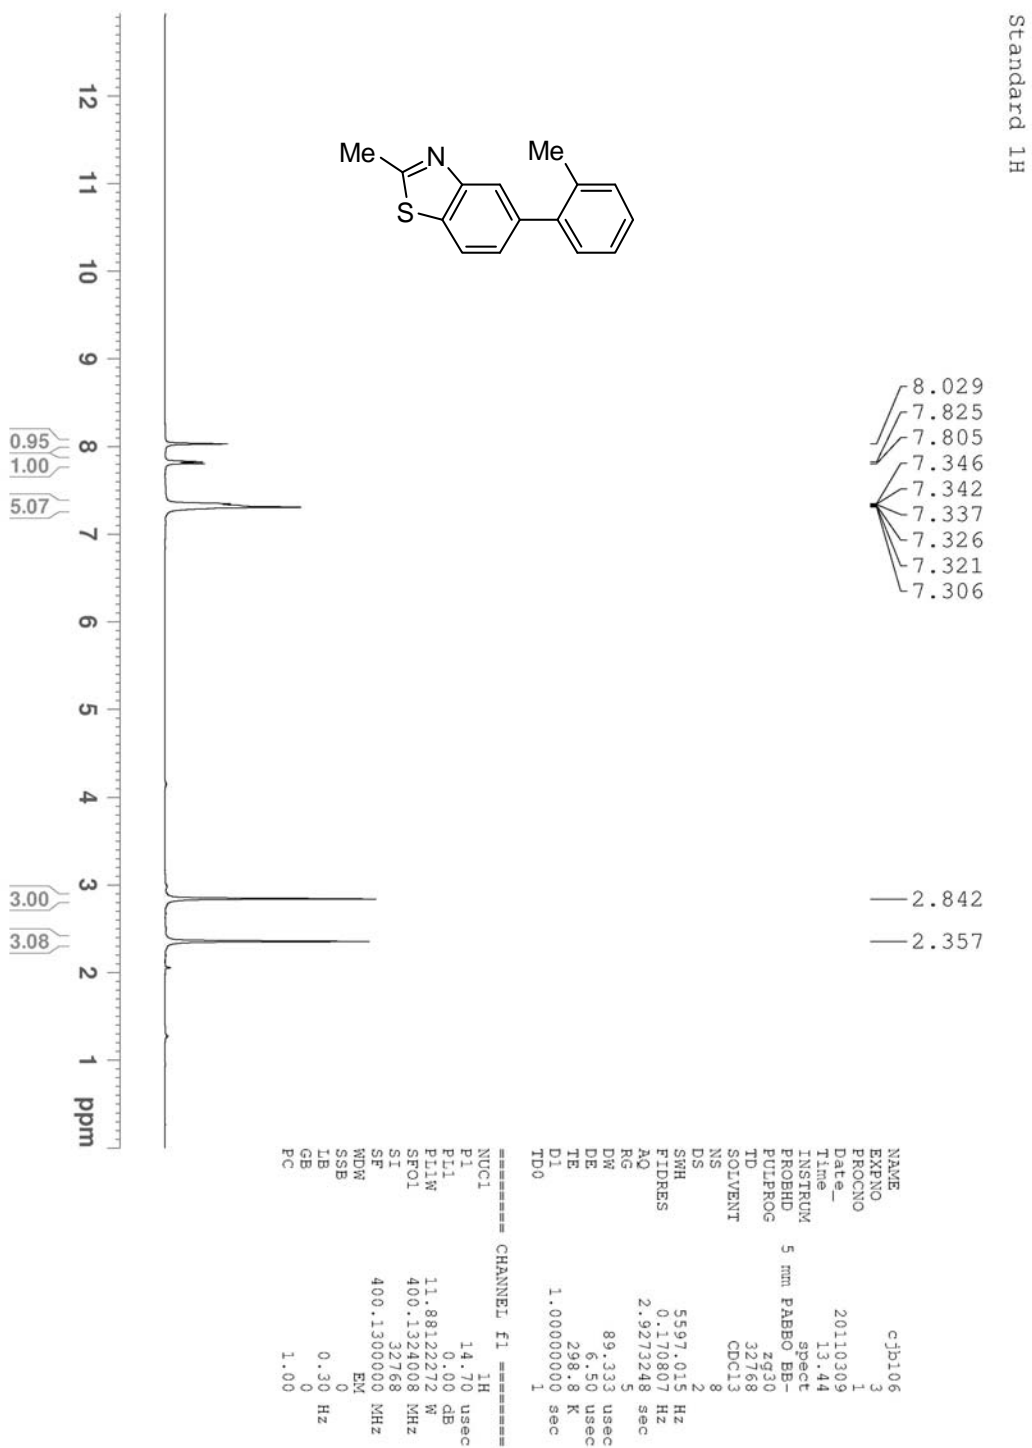

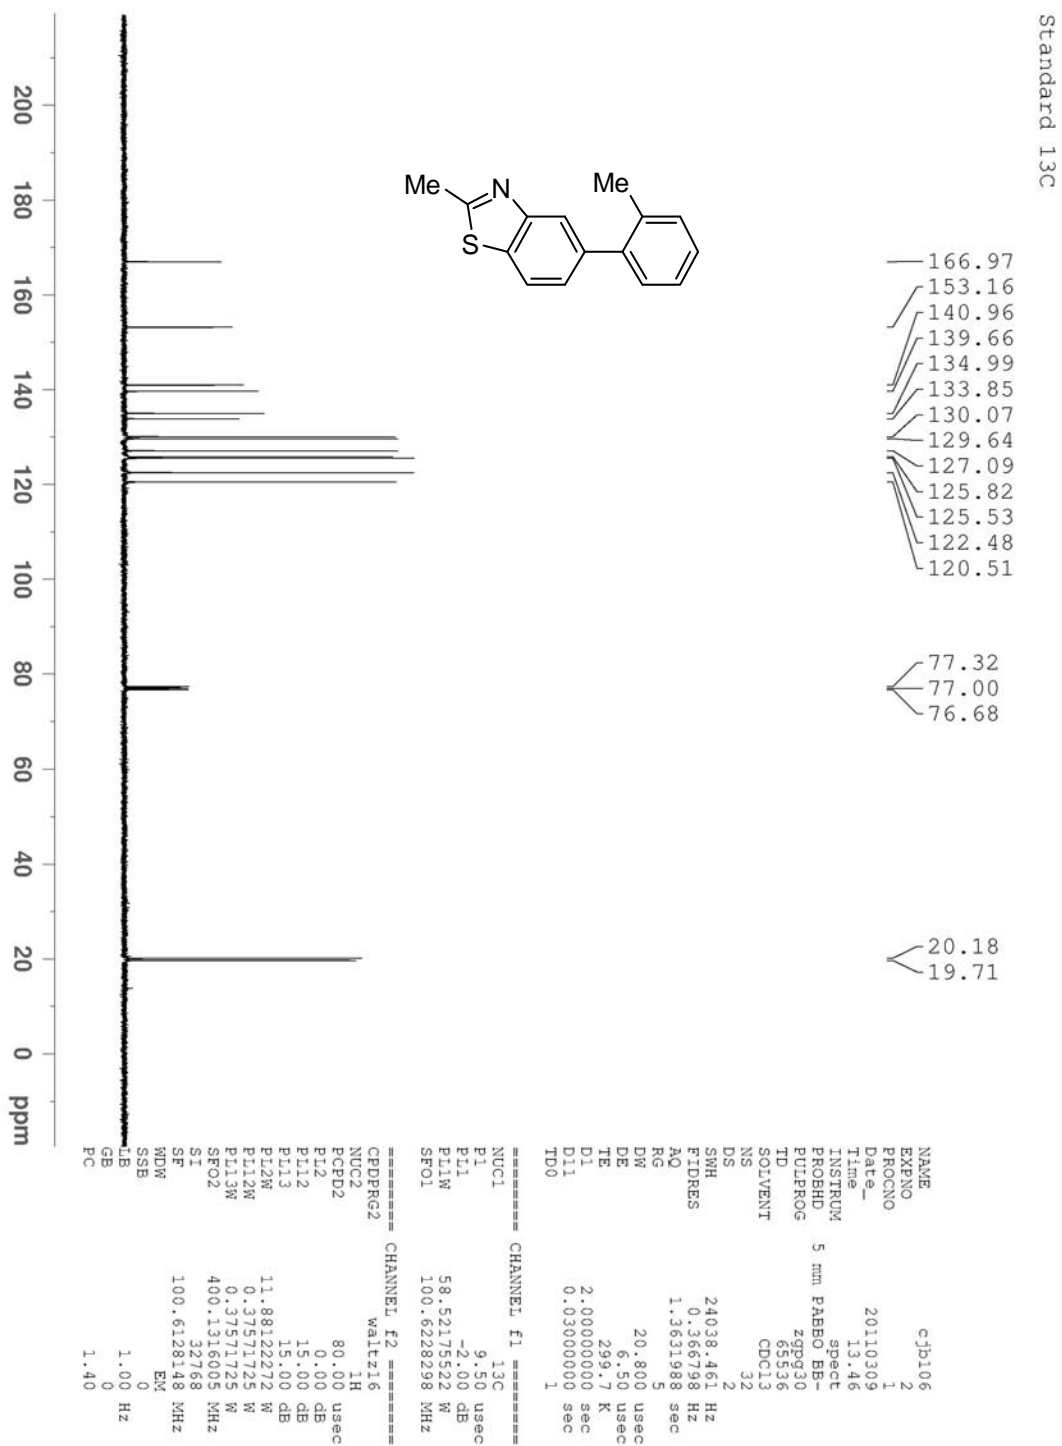

File : C:\msdchem\1\DATA\JIM\cjb106-crude.D  
Operator : Seam  
Acquired : 7 Mar 2011 11:36 using AcqMethod JIM2.M  
Instrument : 5973N  
Sample Name :  
Misc Info :  
Vial Number: 4

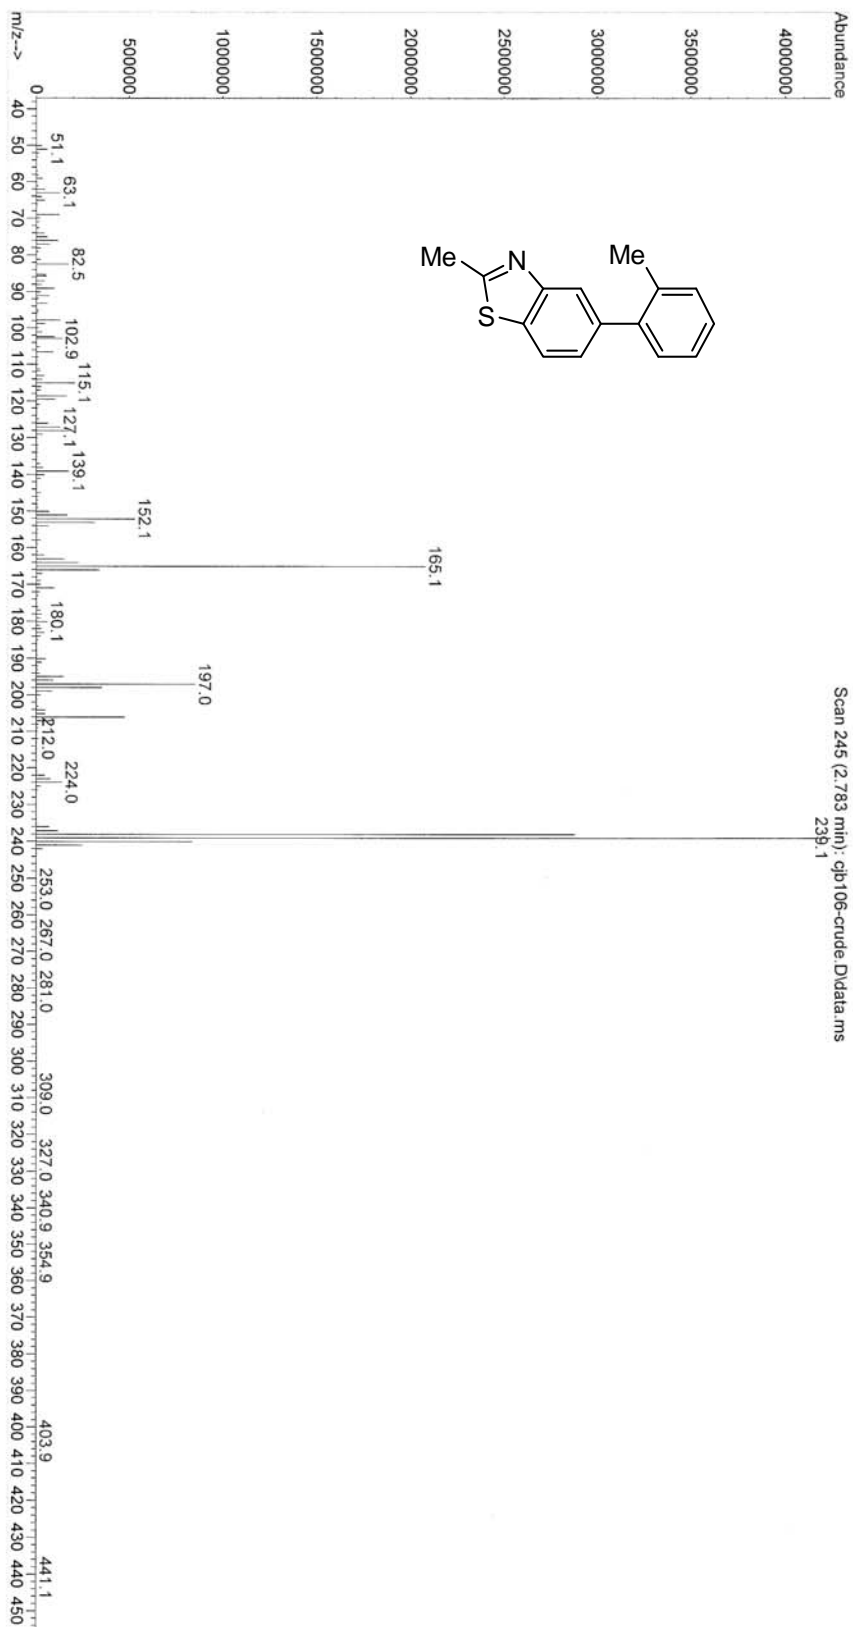

Standard 1H

7.827  
7.824  
7.602  
7.599  
7.591  
7.581  
7.578  
7.570  
7.566  
7.563  
7.559  
7.487  
7.480  
7.469  
7.449  
7.449  
7.380  
7.377  
7.360  
6.801  
6.799  
6.797

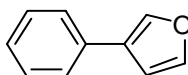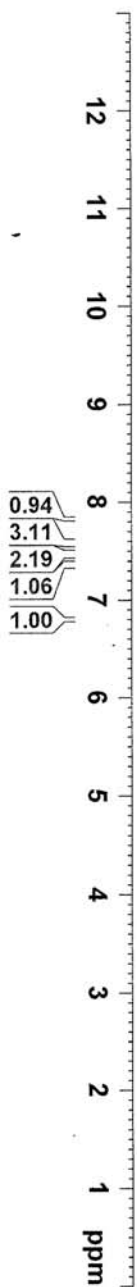

```
NAME bfac075
EXPNO 1
PROCNO 1
Date_ 20110316
Time 11.44
INSTRUM spect
PROBHD 5 mm PABBO BB-
PULPROG zg30
TD 32768
SOLVENT CDC13
NS 8
DS 2
SWH 5597.015 Hz
FIDRES 0.170807 Hz
AQ 2.9273248 sec
RG 5
DW 89.333 usec
DE 6.50 usec
TE 298.0 K
D1 1.00000000 sec
TDO 1

===== CHANNEL f1 =====
NUC1 1H
P1 14.70 usec
PL1 0.00 dB
PL1W 11.88122272 W
SFO1 400.1324008 MHz
SI 32768
SF 400.1300000 MHz
WDW EM
SSB 0
LB 0.30 Hz
GB 0
PC 1.00
```

Standard 13C

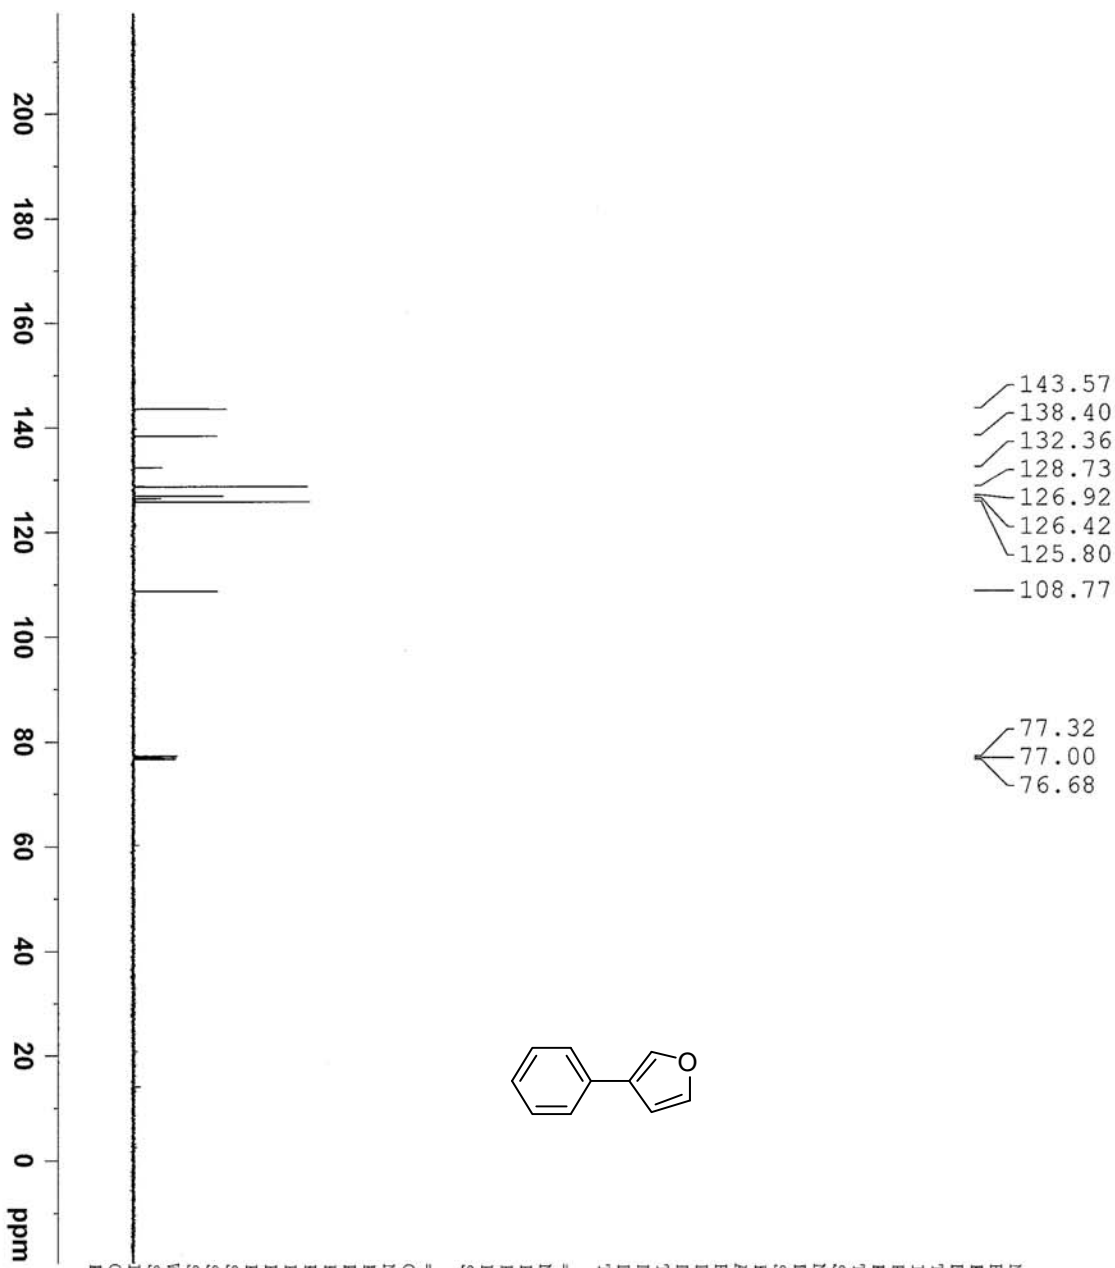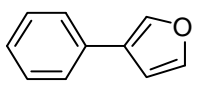

```

NAME                bfac075
EXPNO                2
PROCNO              1
Date_               20110316
Time_              11.47
INSTRUM            spect
PROBHD             5 mm PABBO BB-
PULPROG            zgpg30
TD                 65536
SOLVENT            CDCl3
NS                 13
DS                 2
SWH                24038.461 Hz
FIDRES             0.366798 Hz
AQ                 1.3631988 sec
RG                 5
DW                 20.800 usec
DE                 6.50 usec
TE                 298.4 K
D1                 2.00000000 sec
D11                0.03000000 sec
TD0                1

===== CHANNEL F1 =====
NUC1                13C
P1                  9.50 usec
PL1                 -2.00 dB
PL1W                58.52175522 W
SFO1                100.6228298 MHz

===== CHANNEL F2 =====
CPDPRG2            waltz16
NUC2                1H
PCPD2              80.00 usec
PL2                 0.00 dB
PL12                15.00 dB
PL13                15.00 dB
PL2W                11.88122272 W
PL12W               0.37571725 W
PL13W               0.37571725 W
SFO2                400.1316005 MHz
SI                  32768
SE                  100.6127856 MHz
WDW                 EM
SSB                 0
GB                  1.00 Hz
PC                  1.40
    
```



File : C:\msdchem\1\DATA\JIM\CJB065.D  
Operator : Seam  
Acquired : 26 Feb 2011 00:09 using AcqMethod METHOD2.M  
Instrument : 5973N  
Sample Name :  
Misc Info :  
Vial Number: 3

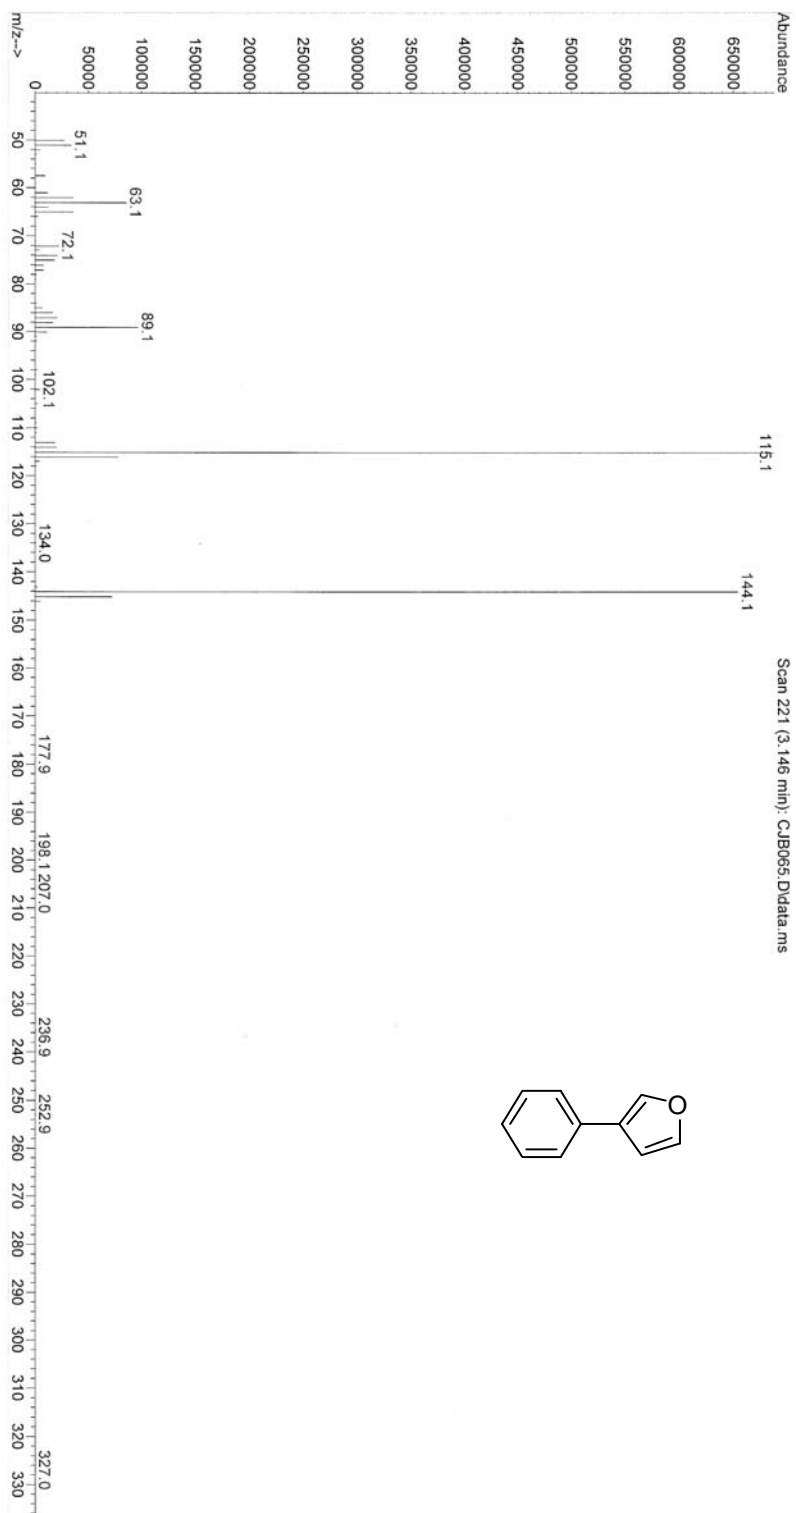

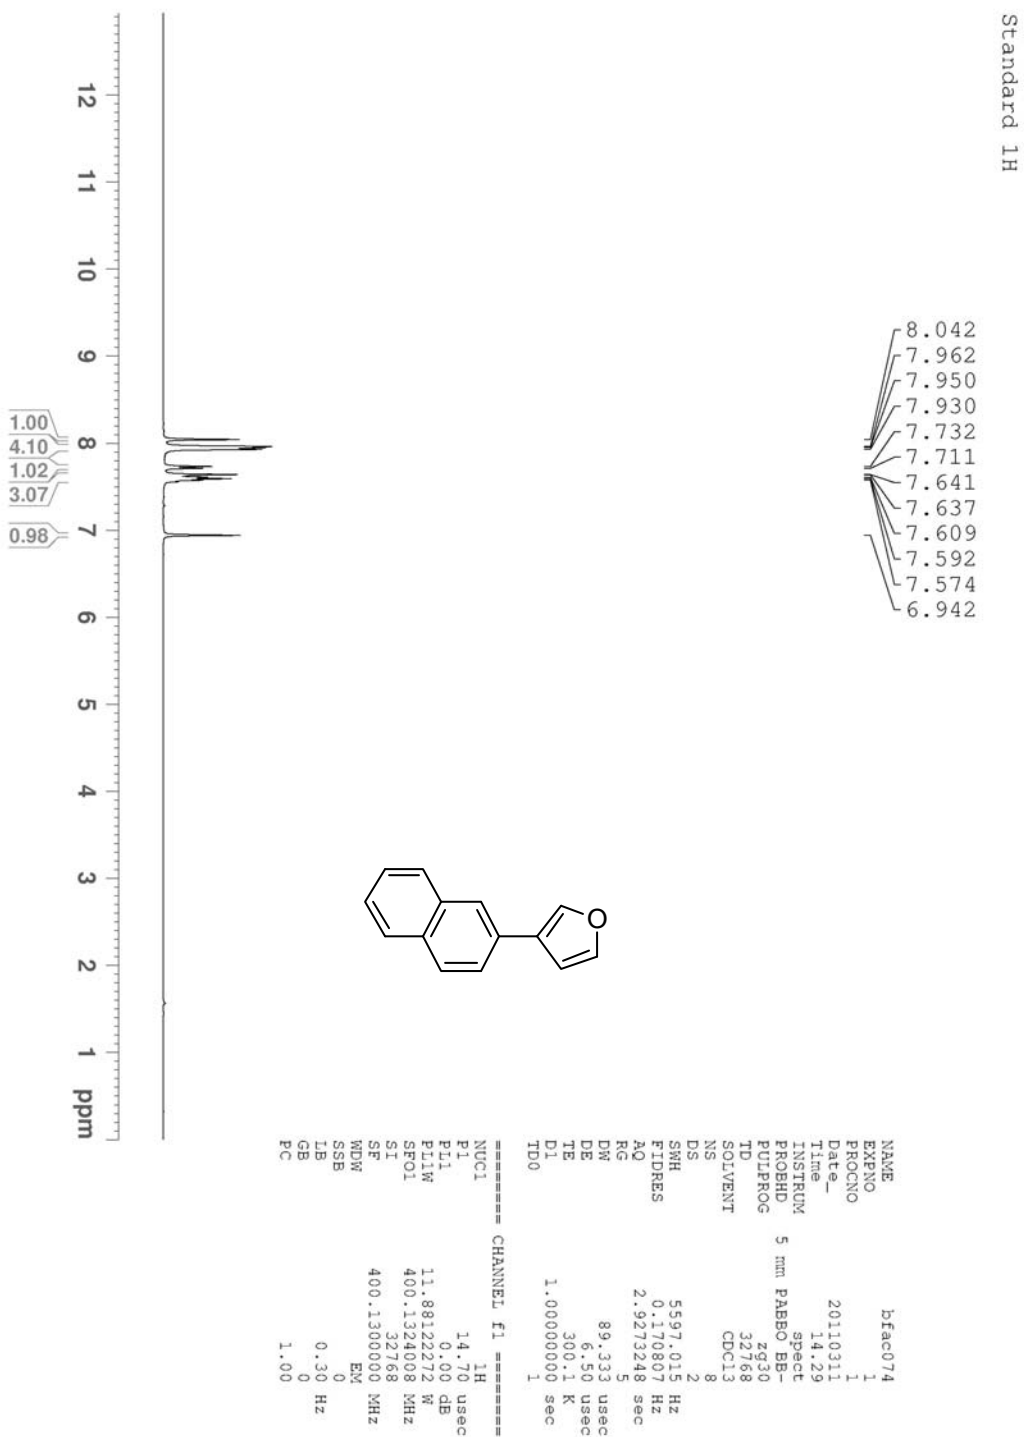

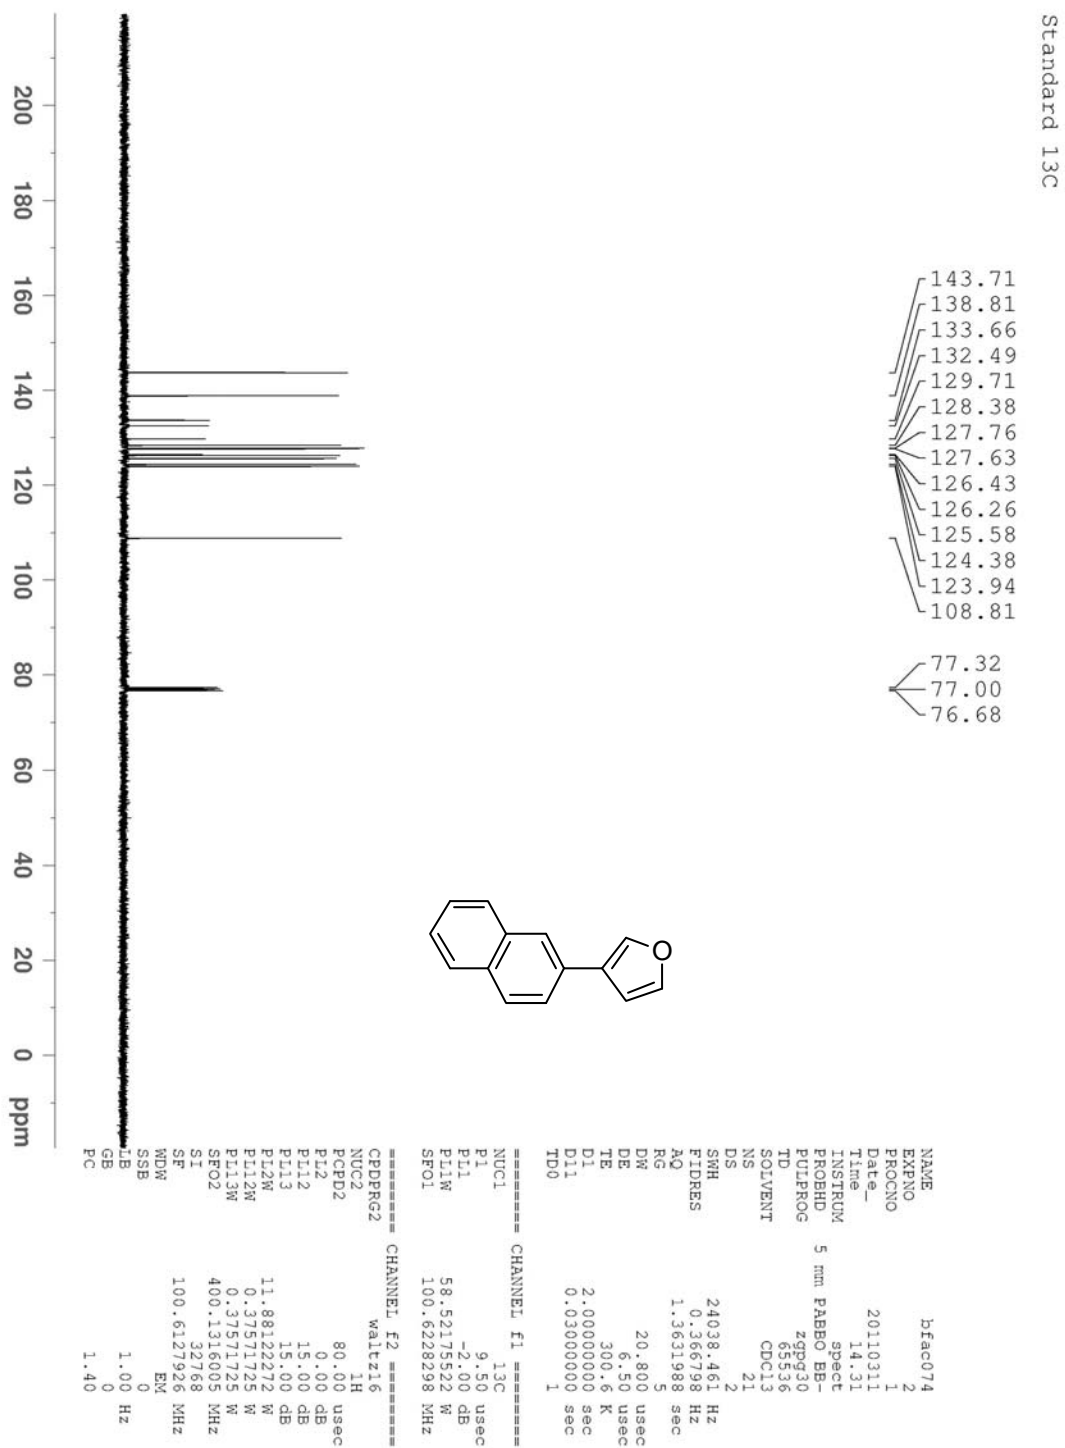

Supporting Information

File : C:\msdchem\1\DATA\cmsc\bfac74.D  
Operator : Seam  
Acquired : 10 Mar 2011 15:45 using AcqMethod JTM2.M  
Instrument : 5973N  
Sample Name :  
Misc Info :  
Vial Number: 3

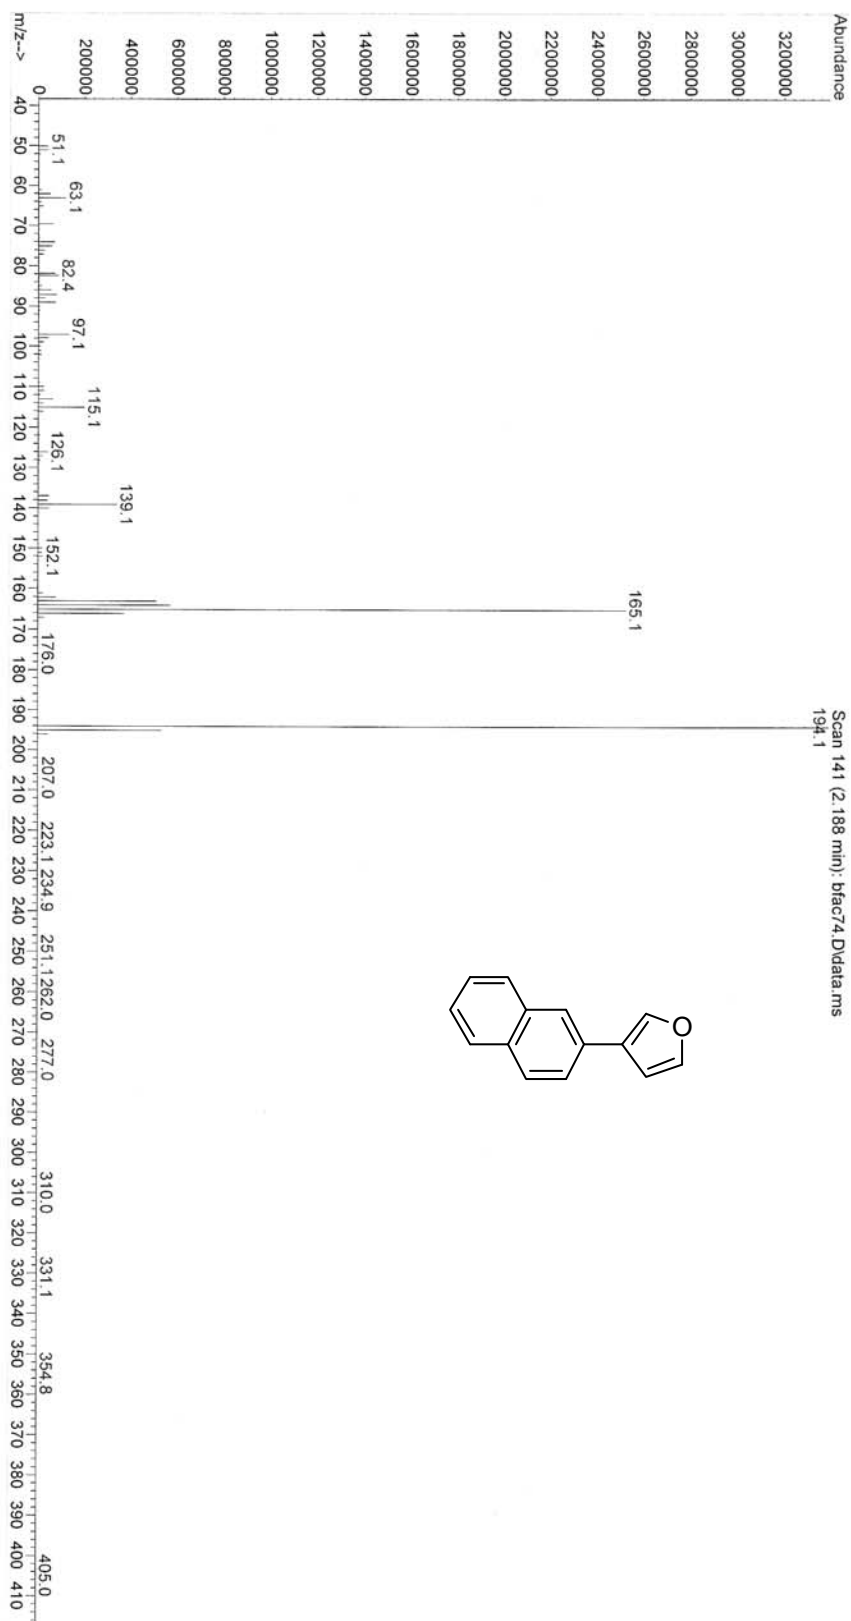

Elemental Composition Report

Page 1

Single Mass Analysis

Tolerance = 5.0 PPM / DBE: min = -1.5, max = 50.0  
Element prediction: Off

Monoisotopic Mass, Odd and Even Electron Ions

Formula(e) evaluated with 1 results within limits (up to 50 closest results for each mass)

Elements Used:

C: 0-14 H: 0-11 O: 0-1 Na: 0-1 39K: 0-1

Kin-Dept-2903011 chan kin ho 40 (0.667) Cm (39:48)

TOF MS EI+

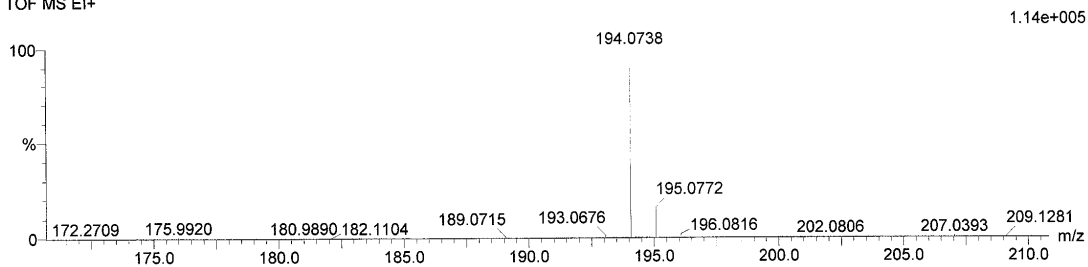

Minimum:

Maximum: 5.0 5.0 -1.5

50.0

| Mass     | Calc. Mass | mDa | PPM | DBE  | i-FIT | Formula   |
|----------|------------|-----|-----|------|-------|-----------|
| 194.0738 | 194.0732   | 0.6 | 3.1 | 10.0 | 24.1  | C14 H10 O |

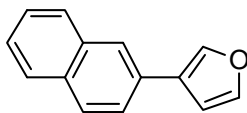

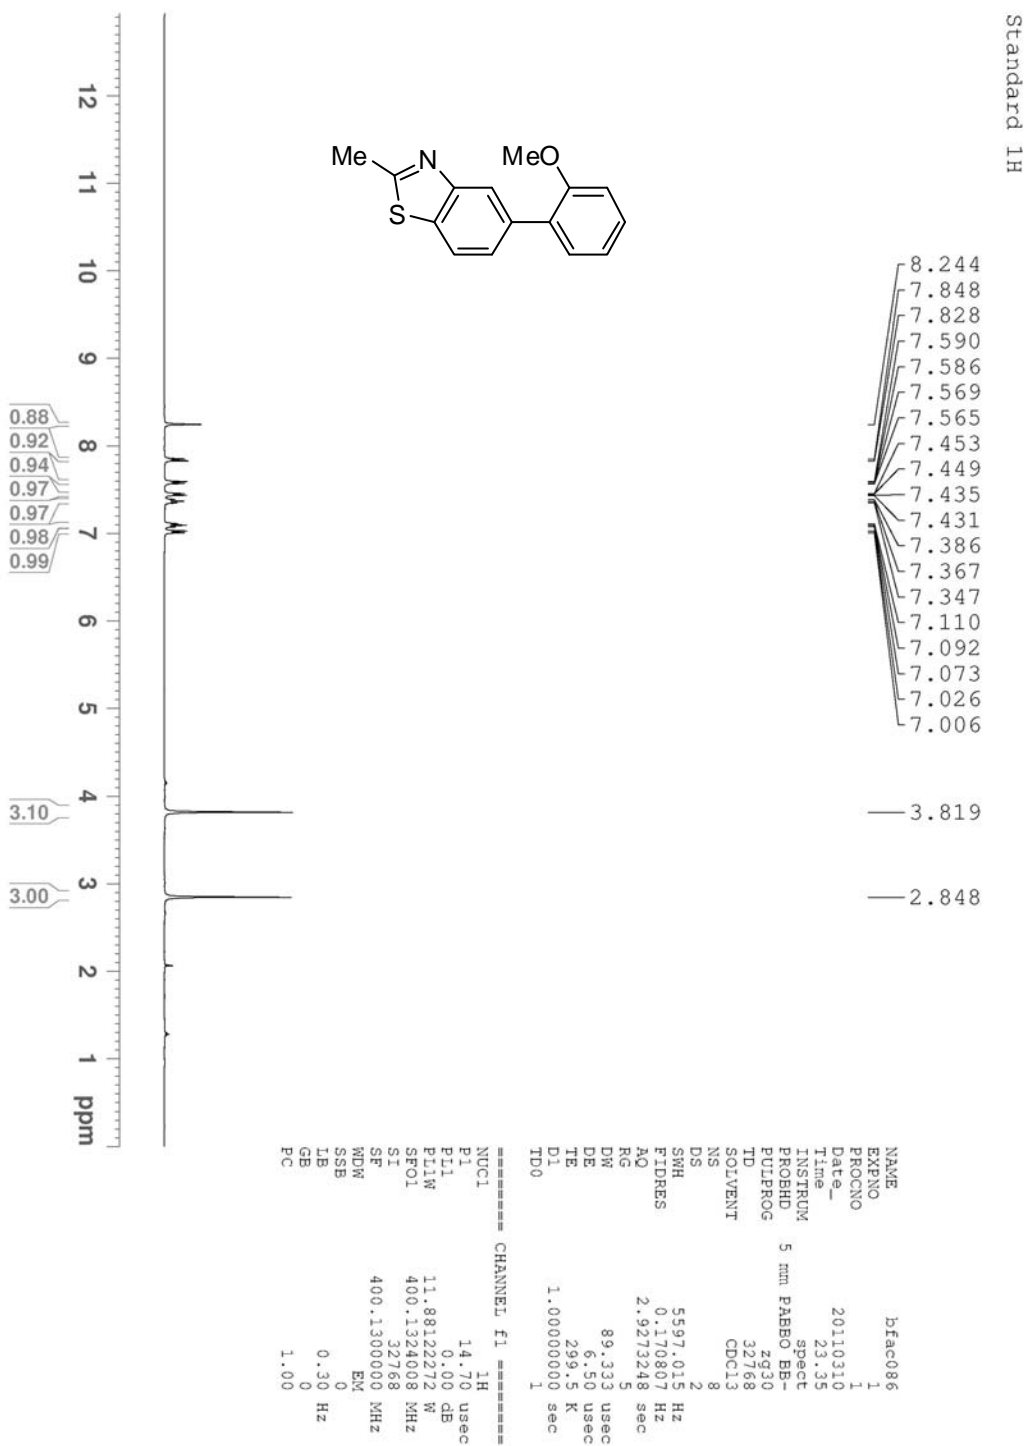

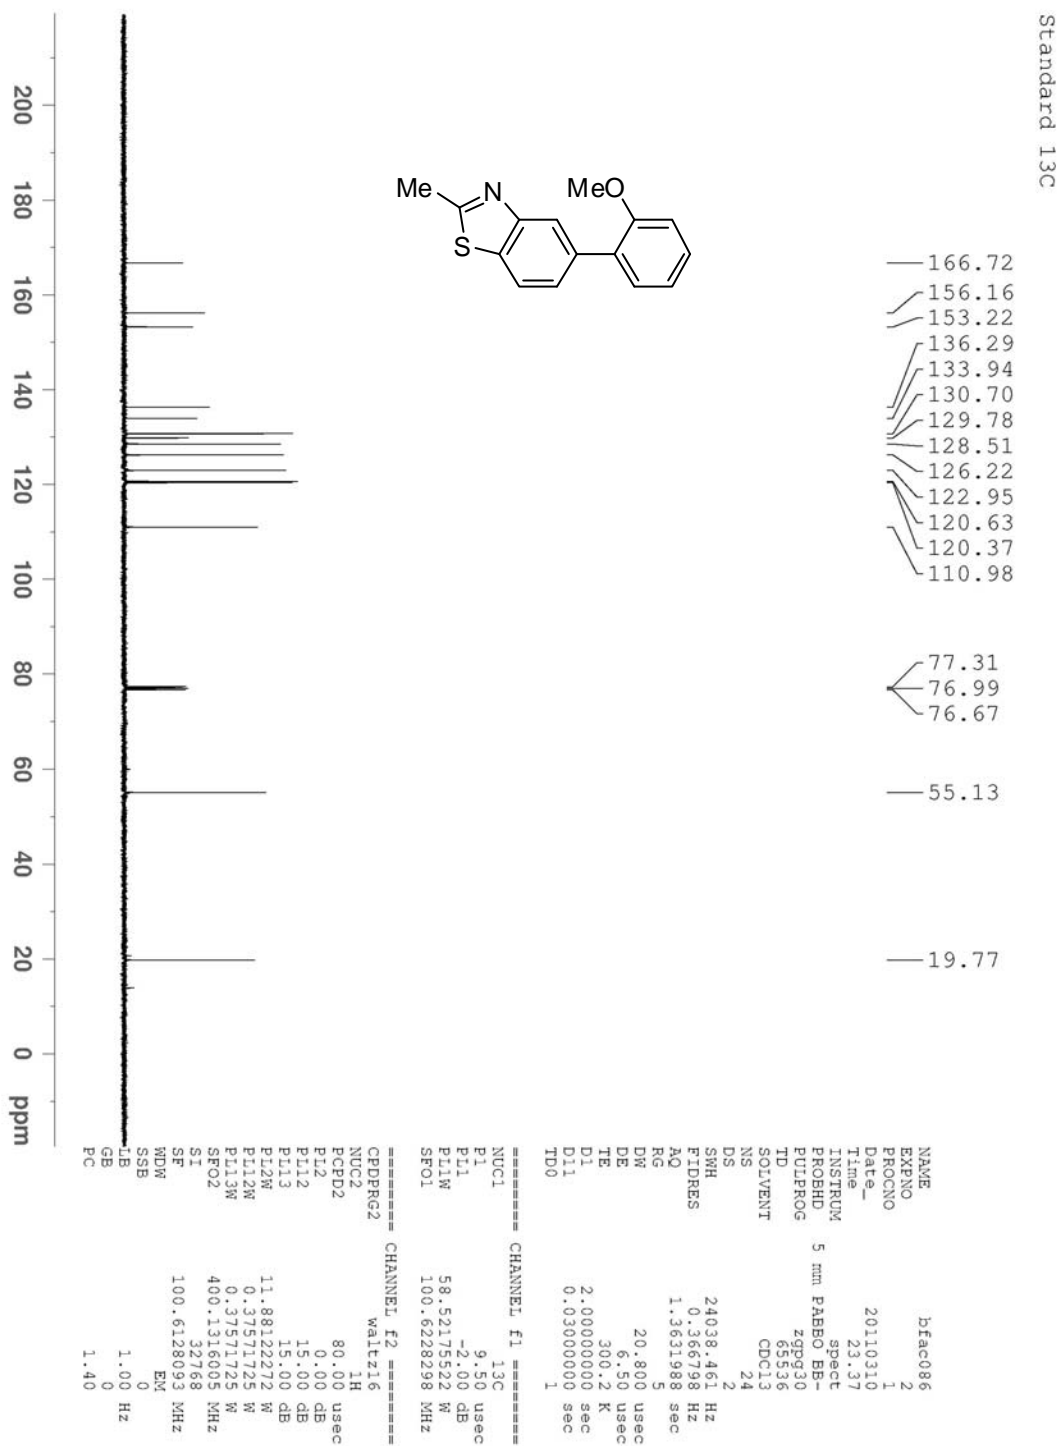

Supporting Information

File : C:\msdchem\1\DATA\cmso\BFAC86.D  
Operator : Seam  
Acquired : 10 Mar 2011 19:51 using AcqMethod JIM2.M  
Instrument : 5973N  
Sample Name :  
Misc Info :  
Vial Number: 7

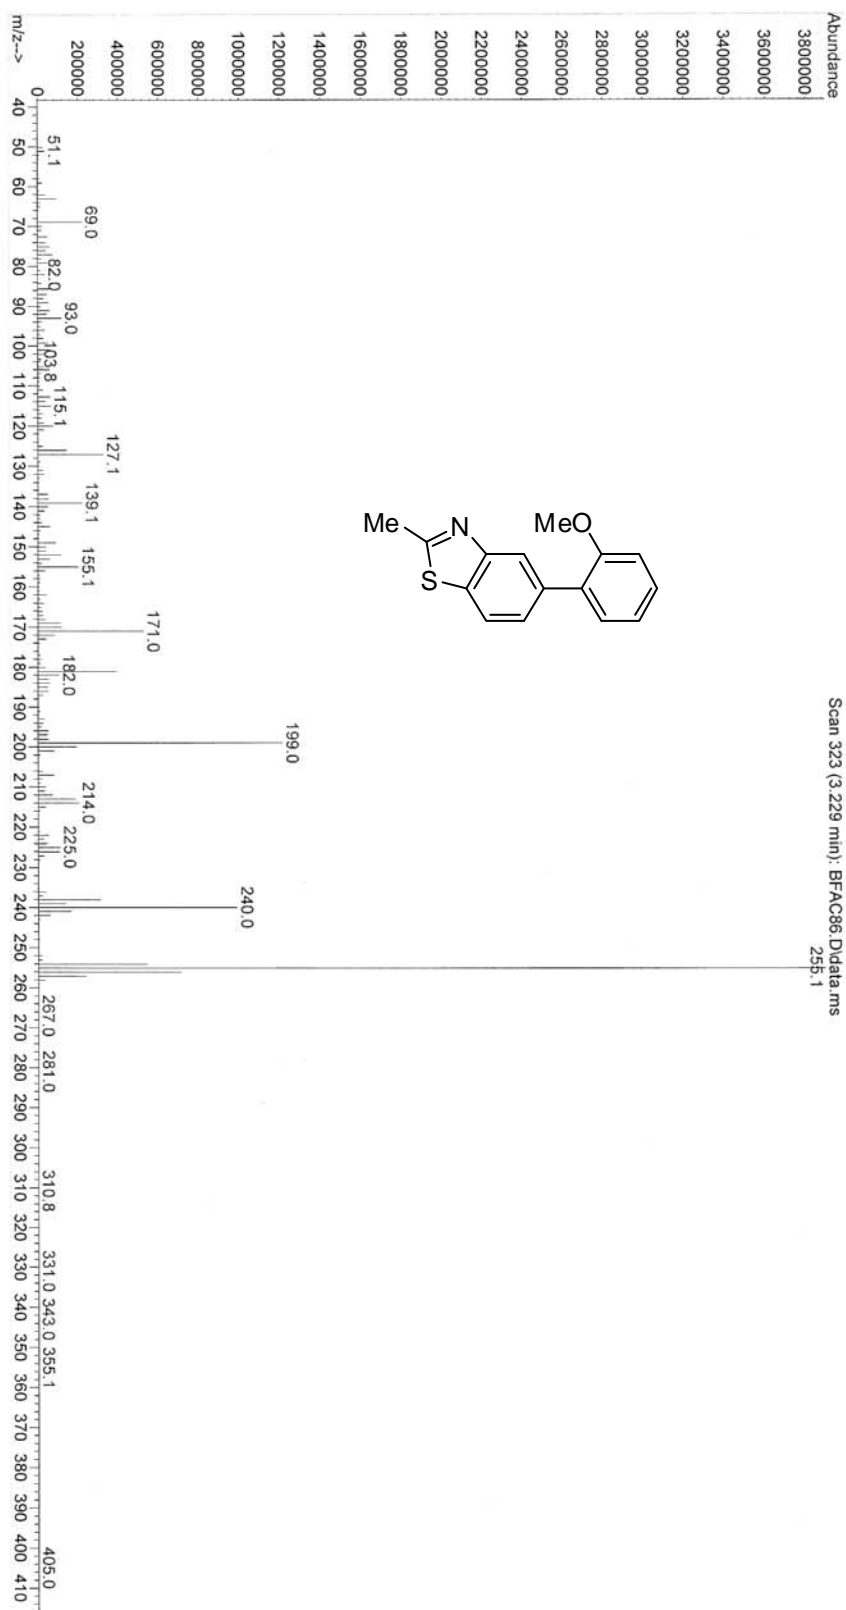



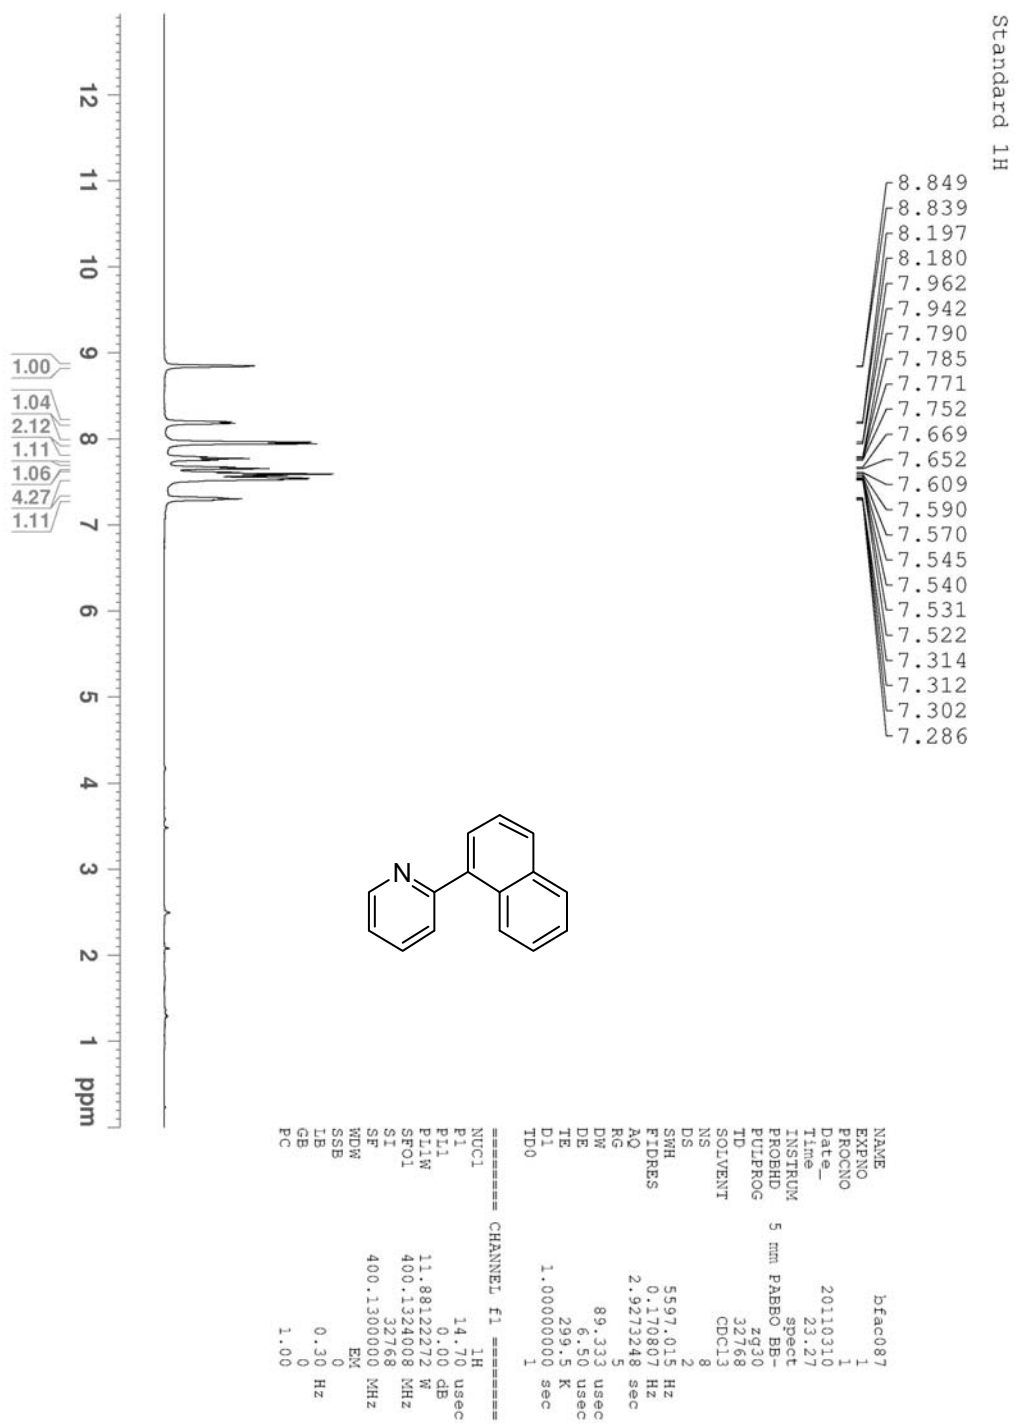

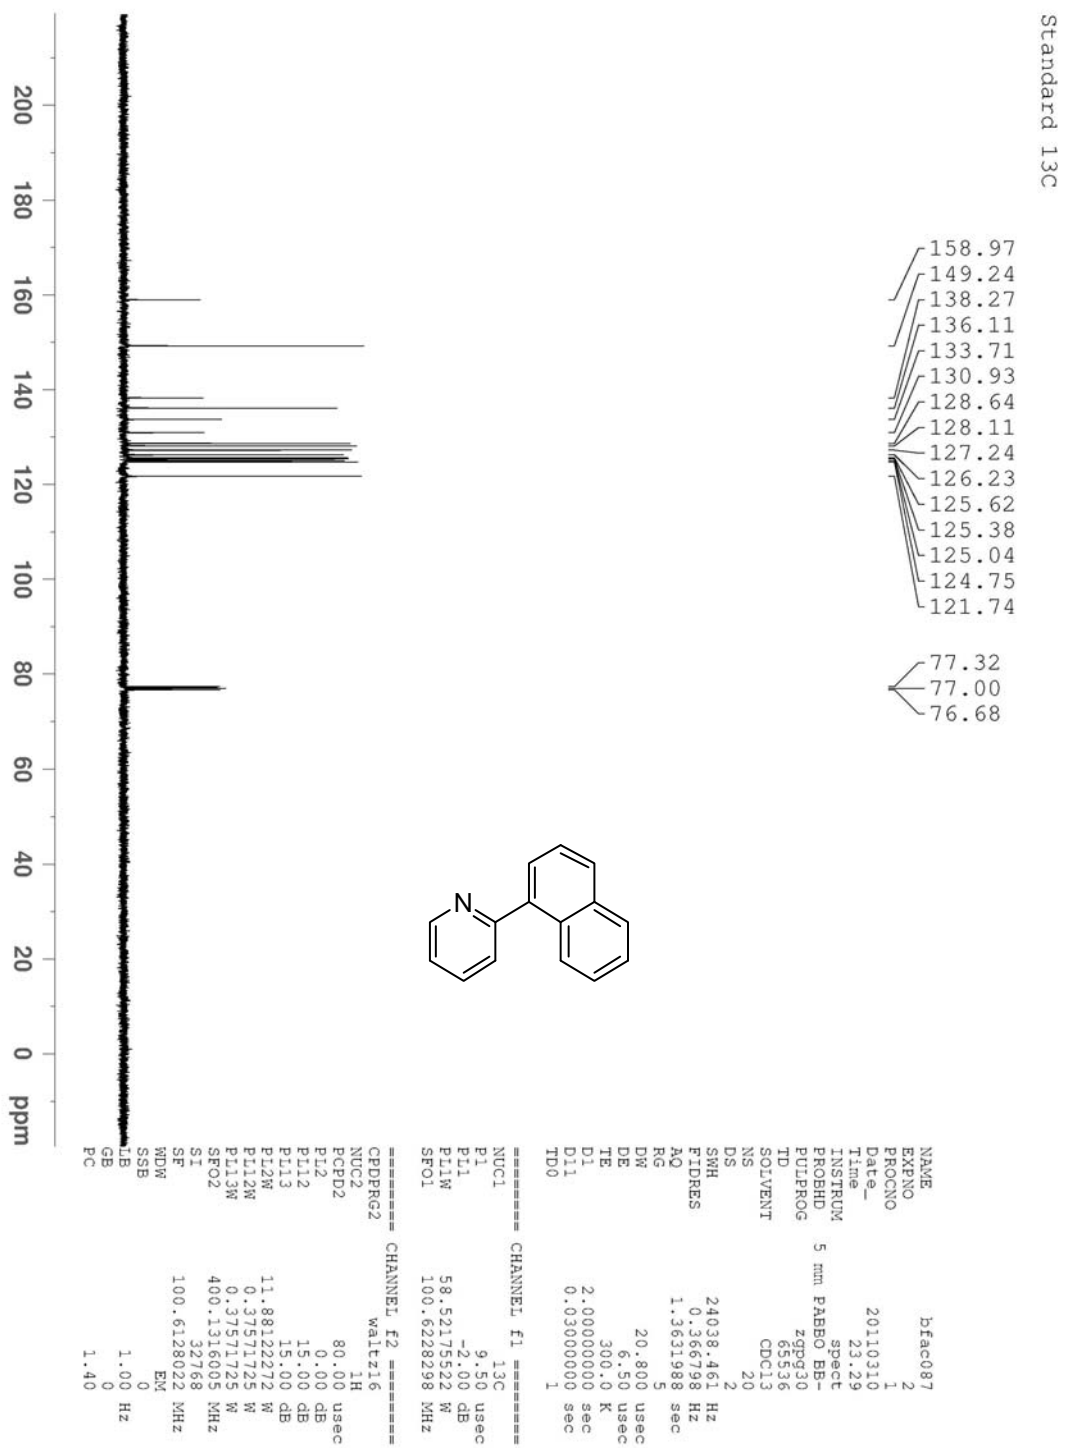

Supporting Information

File : C:\msdchem\1\DATA\cms0\BFAC97.D  
Operator : Seam  
Acquired : 10 Mar 2011 19:58 using AcqMethod JIM2.M  
Instrument : 5973N  
Sample Name :  
Misc Info :  
Vial Number: 8

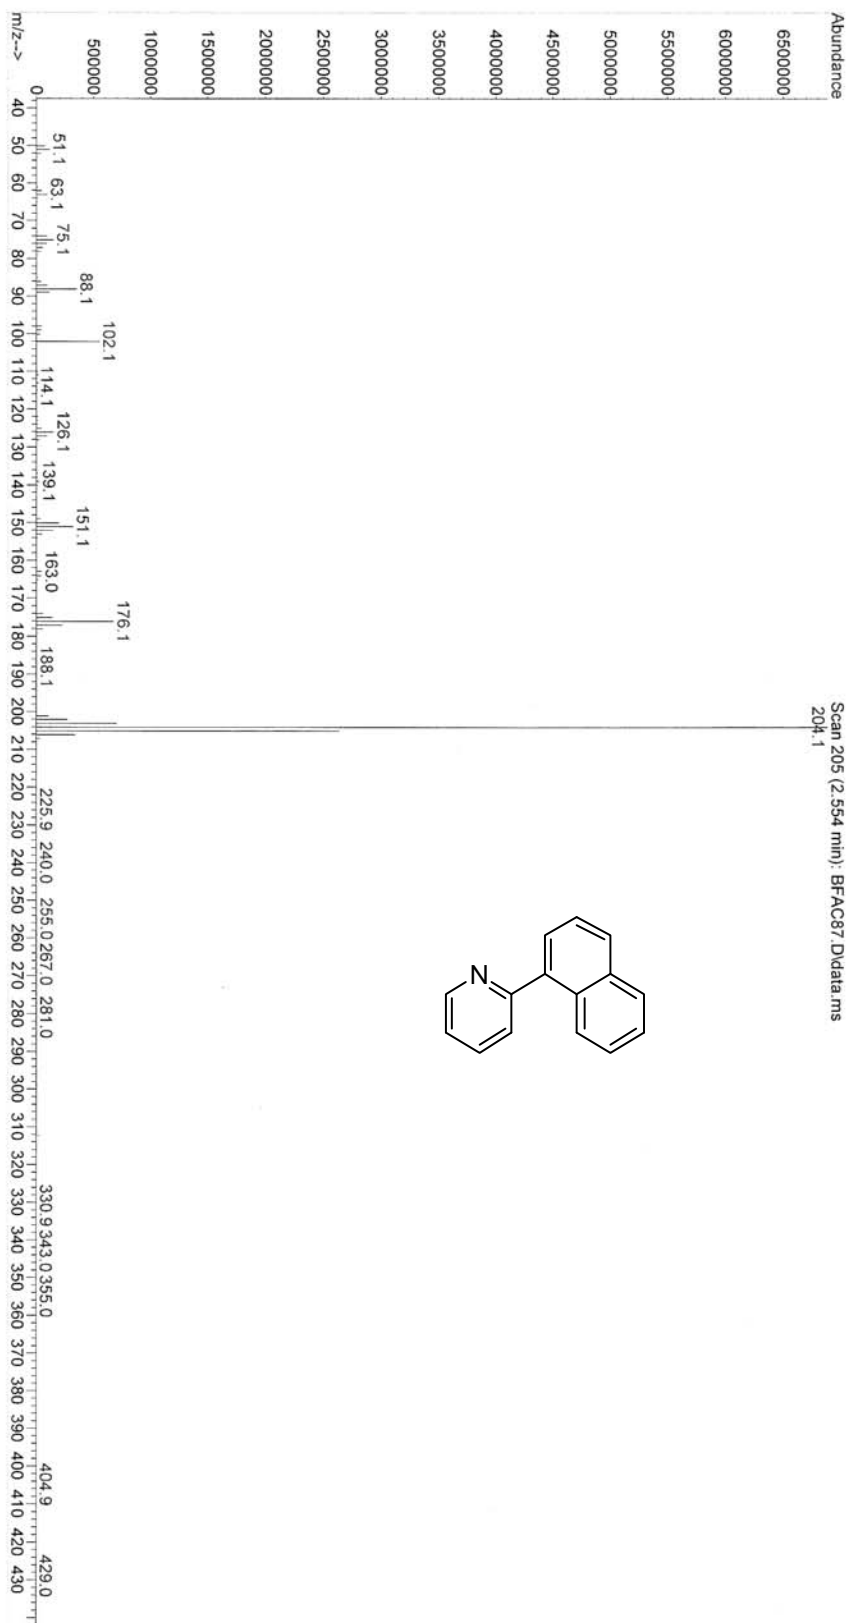

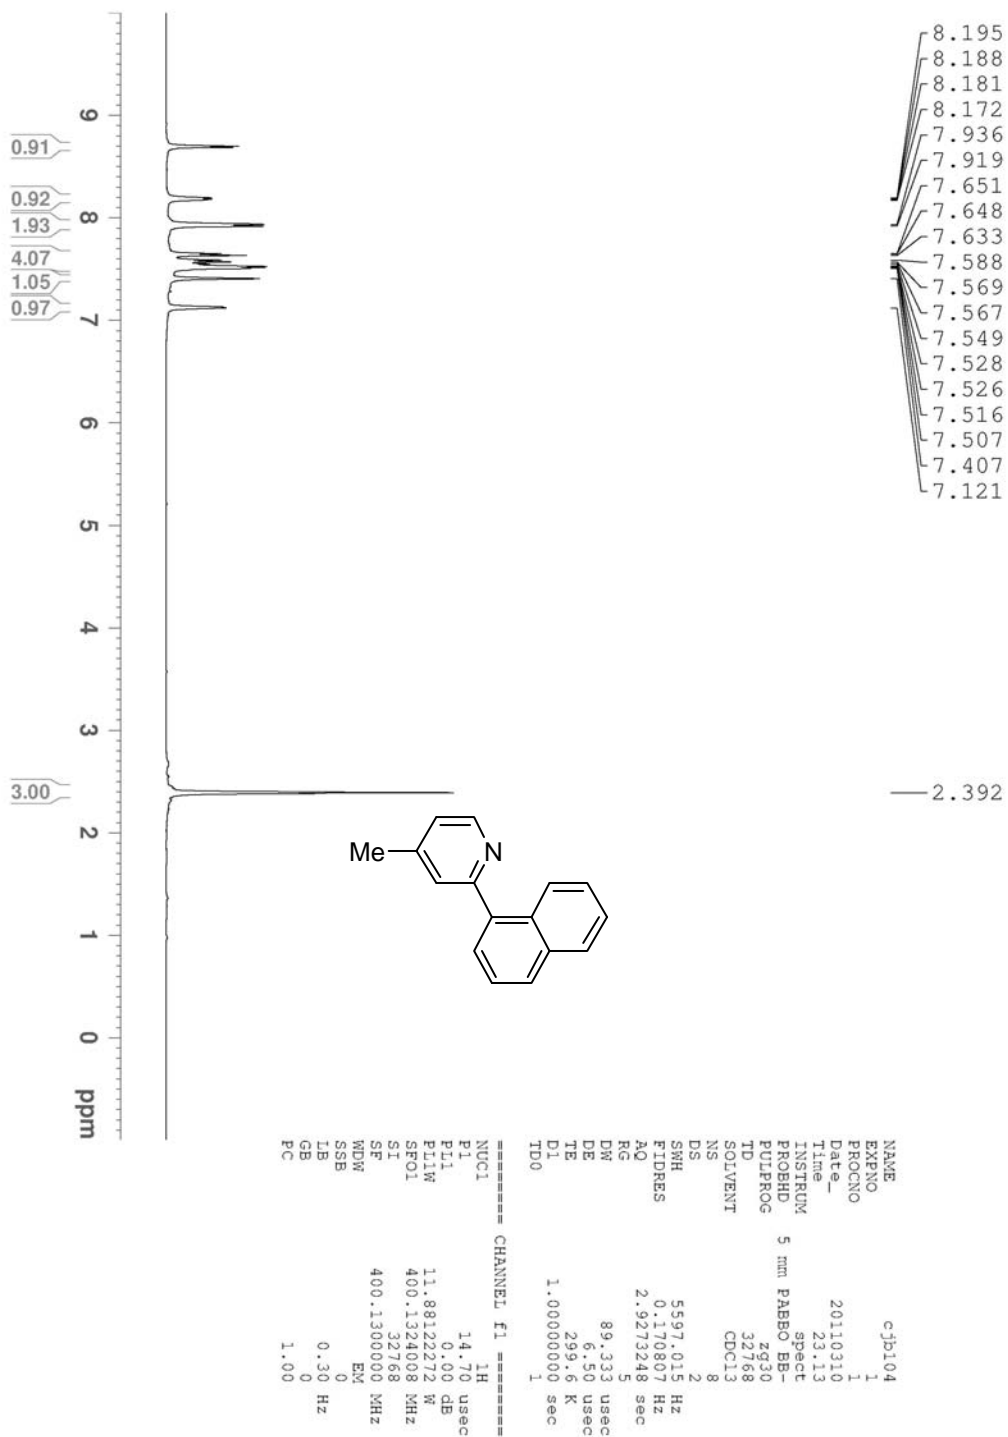

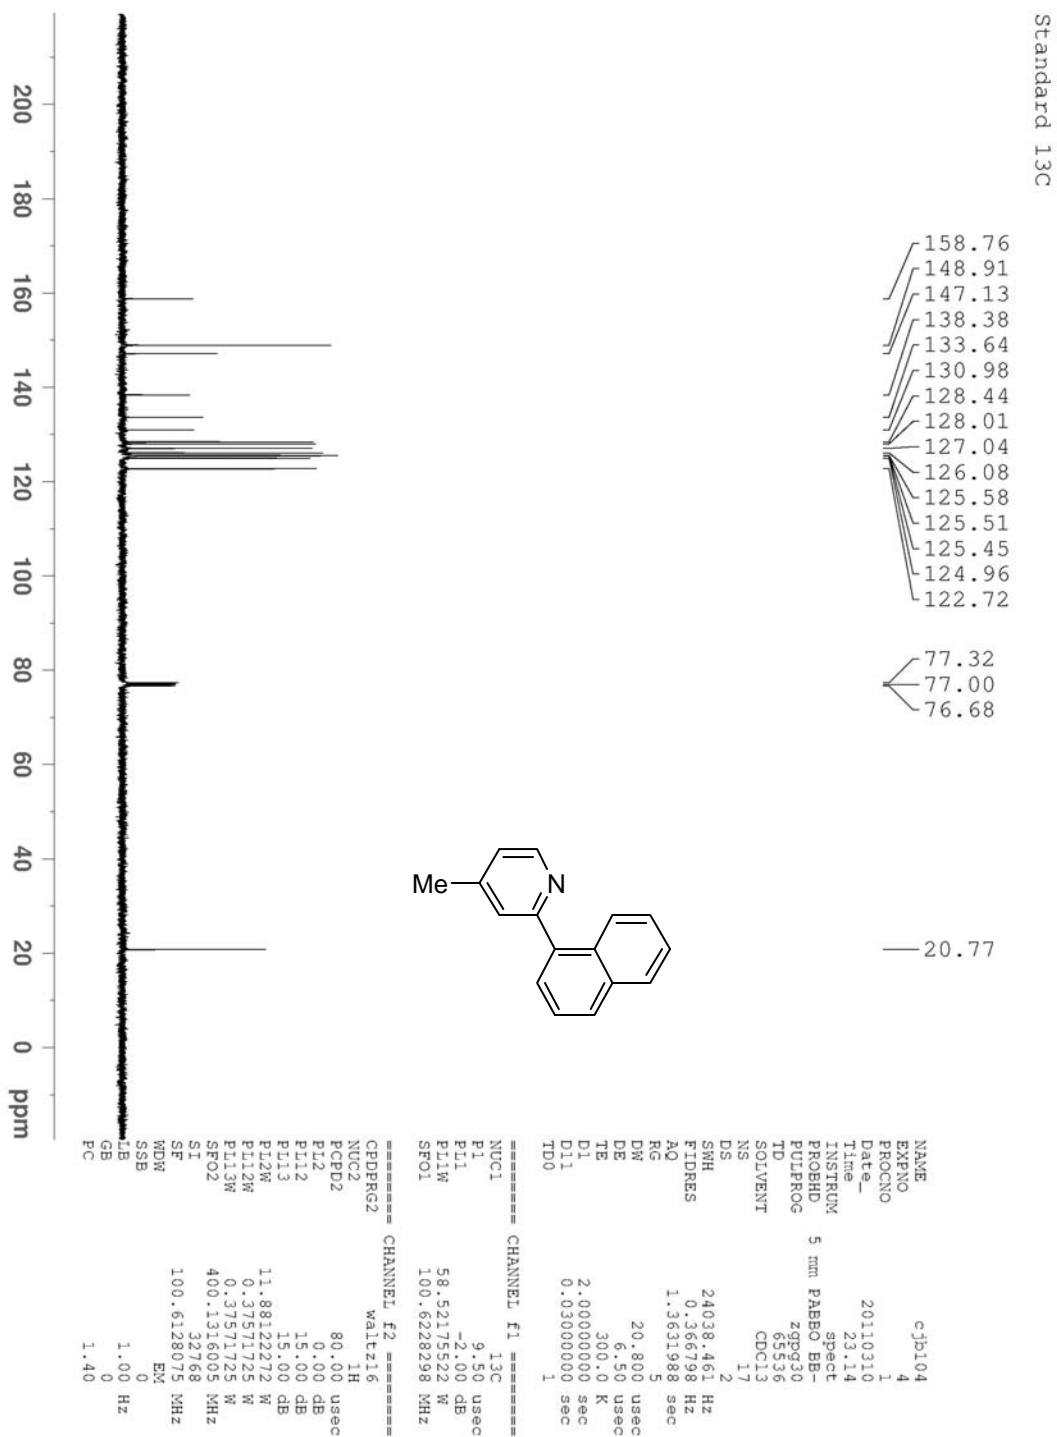

File : C:\msdchem\1\DATA\JIM\cjb104-crude.D  
Operator : Seam  
Acquired : 6 Mar 2011 1:01 using AcqMethod METHOD2.M  
Instrument : 5973N  
Sample Name :  
Misc Info :  
Vial Number: 8

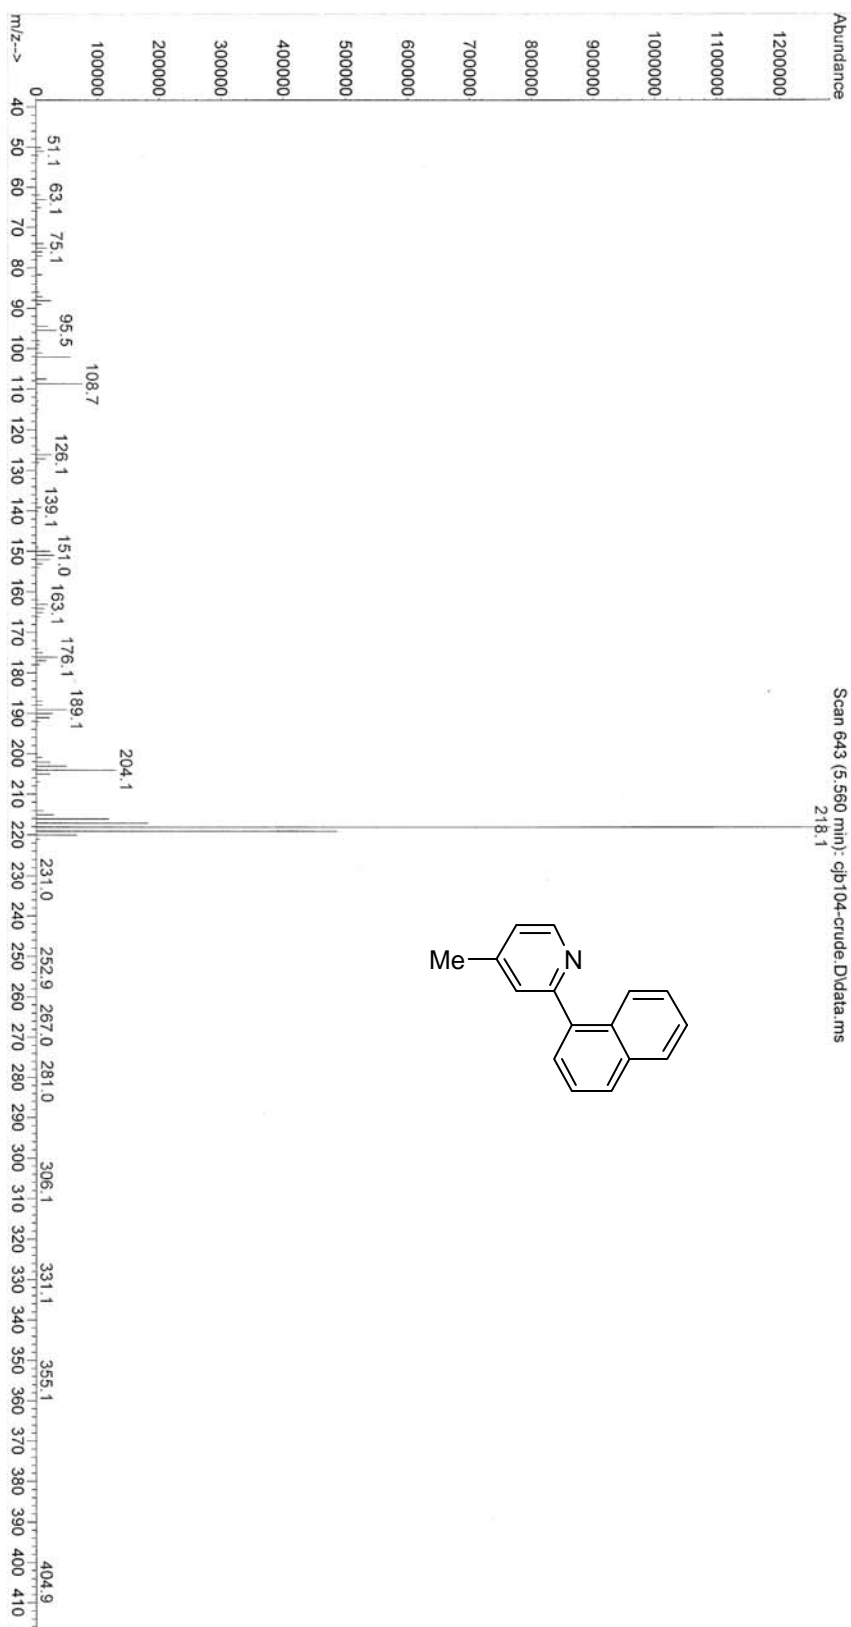

## 10. References.

1. Armarego, W. L. F.; Perrin, D. D., In *Purification of Laboratory Chemicals*, 4<sup>th</sup>, Ed. Butterworth-Heinemann: Oxford UK: 1996.
2. Reddy, K. R.; Krishna, G. G., Palladium-imidazole derivatives as highly active catalysts for Heck reactions. *Tetrahedron Lett* **2005**, *46* (4), 661-663.
3. Letsinger, R. L.; MacLean, D. B., Organoboron Compounds. XVI. Coöperative Functional Group Effects in Reactions of Boronoarylbenzimidazoles. *Journal of the American Chemical Society* **1963**, *85* (15), 2230-2236.
4. Andrus, M. B.; Song, C., *Org. Lett.* **2001**, *3*, 3761-3764.
5. Liu, W.; Cao, H.; Zhang, H.; Zhang, H.; Chung, K. H.; He, C.; Wang, H.; Kwong, F. Y.; Lei, A., *J. Am. Chem. Soc.* **2010**, *132*, 16737-16740.
6. Kataoka, N.; Shelby, Q.; Hartwig, J. P., *J. Org. Chem.* **2002**, *67*, 5553.
7. Hatakeyama, T.; Hashimoto, S.; Ishizuka, K.; Nakamura, M., *J. Am. Chem. Soc.* **2009**, *131*, 11949-11963.
8. Murata, M.; Oda, T.; Watanabe, S.; Masuda, Y., *Synthesis* **2007**, 351-354.
9. V.Percec; Golding, G. M.; Smidrkal, J.; Weichold, O., *J. Org. Chem.* **2004**, *69*, 3447.
10. Liu, P.; Feng, X.-J.; He, R., *Tetrahedron* **2010**, *66*, 631-636.
11. So, C. M.; Lau, C. P.; Kwong, F. Y., *Angew. Chem. Int. Ed.* **2008**, *47*, 8059-8063.
12. Tao, B.; Boykin, D. W., *J. Org. Chem.* **2004**, *69*, 4330-4335.
13. Ackermann, L.; Potukuchi, H. K.; Althammer, A.; Born, R.; Mayer, P., *Org. Lett.* **2010**, *12*, 1004-1007.
14. Pawara, S. S.; Shingareb, M. S.; Thore, S. N., *Lett. in Org. Chem.* **2007**, *4*, 486-490.
15. Raders, S. M.; Kingston, J. V.; Verkade, J. G., *J. Org. Chem.* **2010**, *75*, 1744-1747.
16. Terao, Y.; Wakui, H.; Satoh, T.; Miura, M.; Nomura, M., *J. Am. Chem. Soc.* **2001**, *123*, 10407-10408.
17. Albaneze-Walker, J.; Raju, R.; Vance, J. A.; Goodman, A. J.; Reeder, M. R.; Liao, J.; Maust, M. T.; Irish, P. A.; Espino, P.; Andrews, D. R., *Org. Lett.* **2009**, *11*, 1463-1466.
18. Milne, J. E.; Buchwald, S. L., *J. Am. Chem. Soc.* **2004**, *126*, 13028-13032.
19. Egi, M.; Azechi, K.; Akai, S., *Org. Lett.* **2009**, *11*, 5002-5005.
20. Barder, T. E.; Walker, S. D.; Martinell, J. R.; Buchwald, S. L., *J. Am. Chem. Soc.* **2005**, *127*, 4685-4696.
21. Navarro, O.; Marion, N.; Mei, G. J.; Nolan, S. P., *Chemistry-A European Journal* **2006**, *12*, 5142-5148.
22. Fleckenstein, C.; Roy, S.; Leuthau; Plenio, H., Sulfonated N-heterocyclic carbenes for Suzuki coupling in water. *Chemical Communications* **2007**, (27), 2870-2872.
